1 **The m<sup>6</sup>A reader YTHDF2 is a negative regulator for dendrite development and maintenance of**  
2 **retinal ganglion cells**

3

4 **Short title: YTHDF2 regulates dendrite development and maintenance of RGC**

5

6 Fugui Niu<sup>1,2</sup>, Peng Han<sup>1</sup>, Jian Zhang<sup>1</sup>, Yuanchu She<sup>1</sup>, Lixin Yang<sup>1</sup>, Jun Yu<sup>1</sup>, Mengru Zhuang<sup>1</sup>, Kezhen  
7 Tang<sup>3</sup>, Yuwei Shi<sup>1</sup>, Baisheng Yang<sup>1</sup>, Chunqiao Liu<sup>4</sup>, Bo Peng<sup>5,6\*</sup>, Sheng-Jian Ji<sup>1\*</sup>

8

9 <sup>1</sup>School of Life Sciences, Department of Biology, Shenzhen Key Laboratory of Gene Regulation and  
10 Systems Biology, Brain Research Center, Southern University of Science and Technology, Shenzhen,  
11 Guangdong 518055, China.

12 <sup>2</sup>SUSTech-HIT Joint Graduate Program, Southern University of Science and Technology, Shenzhen,  
13 Guangdong 518055, China.

14 <sup>3</sup>Shenzhen Institutes of Advanced Technology, Chinese Academy of Sciences, Shenzhen, Guangdong  
15 518055, China

16 <sup>4</sup>State Key Laboratory of Ophthalmology, Zhongshan Ophthalmic Center, Sun Yat-sen University,  
17 Guangzhou 510060, China

18 <sup>5</sup>Department of Neurosurgery, Huashan Hospital, and Institute for Translational Brain Research, State  
19 Key Laboratory of Medical Neurobiology, MOE Frontier Center for Brain Science, Fudan University,  
20 Shanghai 200032, China.

21 <sup>6</sup>Co-innovation Center of Neuroregeneration, Nantong University, Nantong, Jiangsu 226001, China.

22 \*For correspondence: [peng@fudan.edu.cn](mailto:peng@fudan.edu.cn) (B.P.), [jisi@SUSTech.edu.cn](mailto:jisi@SUSTech.edu.cn) (S.-J.J.)

23

24

25

26 **Abstract**

27 The precise control of growth and maintenance of the retinal ganglion cell (RGC) dendrite  
28 arborization is critical for normal visual functions in mammals. However, the underlying mechanisms  
29 remain elusive. Here we find that the m<sup>6</sup>A reader YTHDF2 is highly expressed in the mouse RGCs.  
30 Conditional knockout (cKO) of *Ythdf2* in the retina leads to increased RGC dendrite branching,  
31 resulting in more synapses in the inner plexiform layer. Interestingly, the *Ythdf2* cKO mice show  
32 improved visual acuity compared with control mice. We further demonstrate that *Ythdf2* cKO in the  
33 retina protects RGCs from dendrite degeneration caused by the experimental acute glaucoma model.  
34 We identify the m<sup>6</sup>A-modified YTHDF2 target transcripts which mediate these effects. This study  
35 reveals mechanisms by which YTHDF2 restricts RGC dendrite development and maintenance. YTHDF2  
36 and its target mRNAs might be valuable in developing new treatment approaches for glaucomatous  
37 eyes.

38

39

40

41

42 **Impact statement**

43 The m<sup>6</sup>A reader YTHDF2 negatively regulates RGC dendrite branching through destabilizing its m<sup>6</sup>A-  
44 modified target mRNAs encoding proteins controlling dendrite development and maintenance.  
45 *Ythdf2* cKO improves visual acuity and alleviates acute ocular hypertension-induced glaucoma in mice.

46

## 47 Introduction

48 The mammalian retina is an ideal model system to study neuronal development and neural  
49 circuit formation. The retinal ganglion cells (RGCs) are the final and only output neurons in the  
50 vertebrate retina and their dendrites collect the electrical information concerning the visual signal  
51 from all other cells preceding them. One of the major focuses of research in the retina is to  
52 understand how RGC dendrite arborization arises during development (**Prigge and Kay 2018**).  
53 Existing evidences supported that homotypic repulsion controls retinal dendrite patterning (**Lefebvre**  
54 **et al. 2015**). However, in mice which had most RGCs genetically eliminated, the dendrite size and  
55 shape of remaining RGCs appeared relatively normal (**Lin et al. 2004**). Thus, the fact that the  
56 dendrites of remaining RGC did not expand to neighboring areas by the remaining RGCs supports the  
57 existence of the intrinsic limit for RGC dendrite patterning, which cooperates with the homotypic  
58 repulsion to determine the dendrite size of RGCs (**Lefebvre et al. 2015**). However, such intrinsic  
59 limiting mechanisms remain elusive.

60 Glaucoma is one of the leading causes for blindness. The major risk factors for glaucoma include  
61 increased intraocular tension. Studies have shown that glaucoma causes pathological changes in RGC  
62 dendrites before axon degeneration and soma loss were detected in different model animals (**Weber**  
63 **et al. 1998; Shou et al. 2003; Morgan et al. 2006**). Thus, elucidation of mechanisms governing RGC  
64 dendrite arbor maintenance bears clinical significance.

65  $N^6$ -methyladenosine ( $m^6A$ ) is the most widely distributed and extensively studied internal  
66 modification in mRNA (**Dominissini et al. 2012; Meyer et al. 2012; Nachtergaele and He 2018**).  $m^6A$   
67 modification has been shown to regulate brain development and functions in the nervous system  
68 (**Livneh et al. 2020; Yu et al. 2021**). By effectors, most of these studies have focused on its  
69 demethylases (“ $m^6A$  erasers”) and methyltransferases (“ $m^6A$  writers”). Since the fate of  $m^6A$ -  
70 modified transcripts are decoded by the  $m^6A$  binding proteins (“ $m^6A$  readers”), how the readers  
71 mediate these functions and what are their neural target mRNAs remain to be elucidated. In addition,

72 more precisely controlled spatial-temporal ablation of the m<sup>6</sup>A readers instead of null knockout is  
73 required to elucidate their functions and mechanisms in nervous system.

74 In this study, we identified an m<sup>6</sup>A-dependent intrinsic limiting mechanism for RGC dendrite  
75 arborization and maintenance. Conditional knockout of the m<sup>6</sup>A reader YTHDF2 in the developing  
76 mouse retina increases RGC dendrite branching and improves visual acuity. YTHDF2 also mediates  
77 acute ocular hypertension (AOH)-induced RGC degeneration, the experiment model for glaucoma,  
78 and *Ythdf2* cKO in the retina alleviates AOH-induced RGC dendrite shrinking and neuronal loss. The  
79 regulation of RGC dendrite development and maintenance by YTHDF2 is mediated by two distinct  
80 groups of m<sup>6</sup>A-modified target mRNAs which encode proteins that promote dendrite arborization  
81 during development and maintain dendrite tree during injury, respectively. Therefore, our study  
82 reveals mechanisms by which YTHDF2 restricts RGC dendrite development and maintenance, which  
83 sheds light on developing new treatment approaches for glaucomatous eyes.

84

## 85 **Results**

### 86 **Knockdown of YTHDF2 leads to a robust increase of RGC dendrite branching**

87 To examine whether m<sup>6</sup>A modification and its reader proteins play a role in the dendrite  
88 development, we utilized the retina as the model system. We first checked their expression patterns  
89 in the developing mouse retina. Immunostaining with a widely used m<sup>6</sup>A antibody demonstrated that  
90 RGCs had high m<sup>6</sup>A modification levels (*Figure 1—figure supplement 1A*). Consistent with the m<sup>6</sup>A  
91 distribution, the m<sup>6</sup>A reader YTHDF2 is highly expressed in RGCs (*Figure 1A; Figure 1—figure*  
92 *supplement 1A*). Conversely, the expression of YTHDF2 in other layers of the retina is much lower  
93 (*Figure 1A; Figure 1—figure supplement 1B*). Another two m<sup>6</sup>A readers YTHDF1 and YTHDF3 show  
94 similar expression patterns (*Figure 1—figure supplement 1C,D*). The strong expression of YTHDFs and  
95 high level of m<sup>6</sup>A modification in RGCs suggest that the m<sup>6</sup>A reader YTHDFs might play roles in RGC  
96 development. We dissected and dissociated the retinal cells and cultured in vitro. We generated lenti  
97 viral shRNAs against YTHDFs, which showed similarly efficient knockdown (KD) of YTHDFs in RGC

98 cultures in vitro (*Figure 1B; Figure 1—figure supplement 1E,F*). In these YTHDF-deficient RGC cultures,  
99 the first and most obvious phenotype that we observed is the robust increase of dendrite branching  
100 of cultured RGCs treated by *shYthdf2* (*Figure 1C,D; Figure 1—figure supplement 1G,H*). In contrast,  
101 the dendrite branching of RGCs with YTHDF1 KD using *shYthdf1* was not significantly different from  
102 control shRNA (*Figure 1—figure supplement 1I*), while YTHDF3 KD using *shYthdf3* caused a slight  
103 (statistically significant in several Sholl radii) decrease of RGC dendrite branching compared with  
104 control shRNA (*Figure 1—figure supplement 1J*). These results suggest that the m<sup>6</sup>A reader YTHDF2  
105 might play an important role in controlling dendrite branching of RGCs.

106

### 107 **Conditional knockout of *Ythdf2* in the retina increases RGC dendrite branching in vivo without** 108 **disturbing sublaminal targeting**

109 To further explore whether YTHDF2 physiologically regulates RGC dendrite branching in vivo, we  
110 generated *Ythdf2* conditional knockout (*Ythdf2* cKO) mouse (*Figure 2A*). We used the *Six3-cre* mouse  
111 line (*Furuta et al. 2000*), which has been widely used in the field to generate retina-specific  
112 knockouts (*Lefebvre et al. 2012; Riccomagno et al. 2014; Sapkota et al. 2014; Krishnaswamy et al.*  
113 **2015**). YTHDF2 expression is efficiently eliminated in the *Ythdf2* cKO retina compared with their  
114 littermate controls at E12.5 (*Figure 2—figure supplement 1A*) and E15.5 (*Figure 2B*). Retina  
115 progenitors, amacrine cells, bipolar cells, photoreceptors, or horizontal cells were not affected in  
116 *Ythdf2* cKO retina (*Figure 2—figure supplement 1B-L*), suggesting that YTHDF2 is not involved in the  
117 generation or development of these cells. This is in line with the low YTHDF2 expression in these cells.  
118 The RGC number or density was not affected in the *Ythdf2* cKO retina (*Figure 2C,D*), demonstrating  
119 that *Ythdf2* knockout does not disturb RGC neurogenesis. We then cultured RGCs from the *Ythdf2*  
120 cKO retina. The dendrite branching of *Ythdf2* cKO RGCs was significantly increased compared with  
121 littermate controls (*Figure 2E,F*). RGCs include over 40 subtypes (*Sanes and Masland 2015; Baden et*  
122 **al. 2016**). We thus examined the RGC dendrite branching within different subtypes. One of the RGC  
123 subgroups responds preferentially to movement in particular directions and is named the ON-OFF

124 directionally selective RGCs (ooDSGCs). Expression of CART (cocaine- and amphetamine-regulated  
125 transcript), a neuropeptide, distinguishes ooDSGCs from other RGCs (**Kay et al. 2011**). The dendrite  
126 branching of ooDSGCs marked by CART/Brn3a co-staining in *Ythdf2* cKO retinal cultures also  
127 increased compared with control (*Figure 2G,H*). These data further confirm that the m<sup>6</sup>A reader  
128 YTHDF2 regulates dendrite branching of RGCs.

129       Next, we wanted to confirm this phenotype in vivo by checking specific RGC subtypes.  
130 Intravitreal injection of an AAV reporter expressing ZsGreen visualized the dendrite morphology of  
131 ooDSGCs marked by CART immunostaining (*Figure 3A*). ooDSGCs showed dramatically increased  
132 dendrite branching in *Ythdf2* cKO retina compared with control retina by Sholl analysis (*Figure 3A,B*).  
133 The intrinsically photosensitive RGCs (ipRGCs) are unique and melanopsin-expressing cells, which  
134 exhibit an intrinsic sensitivity to light (**Hattar et al. 2002**). We analyzed the morphology of ipRGCs  
135 visualized by wholemound immunostaining of melanopsin and found that the dendrite branching of  
136 ipRGCs was significantly increased in the *Ythdf2* cKO retina (*Figure 3C,D; Figure 3—figure supplement*  
137 *1A-E*). A similar trend was observed in the SMI-32<sup>+</sup>  $\alpha$ RGCs (*Figure 3E,F*). These results strongly  
138 indicate that the m<sup>6</sup>A reader YTHDF2 negatively regulates RGC dendrite branching in vivo and *Ythdf2*  
139 cKO promotes RGC dendrite arborization.

140       In the retina, RGCs target their dendrites in different sublaminae of the inner plexiform layer  
141 (IPL). Since the IPL sublamina targeting of RGC dendrites is critical for normal visual functions, we  
142 wondered whether the increased dendrite branching caused by *Ythdf2* cKO was also accompanied by  
143 altered sublamina patterning of RGC dendrites. We used a *Thy1-GFP* reporter (line O) which labels a  
144 few RGCs (**Feng et al. 2000**). As shown in *Figure 3—figure supplement 1F,G*, GFP intensity is generally  
145 higher in IPL of the *Ythdf2* cKO retina compared with their littermate controls, which further proves  
146 the increased RGC dendrite branching and density. However, the sublamina pattern of GFP signals  
147 looks similar between cKO and littermate control (*Figure 3—figure supplement 1F,G*). Sublamina  
148 dendrite patterning of the ipRGC subtype visualized by immunostaining of melanopsin also  
149 demonstrated the similar phenotype (*Figure 3—figure supplement 1H,I*). These data suggest that

150 YTHDF2 has a general control of RGC dendrite branching but has no striking effect on the sublamina  
151 targeting of RGC dendrite. These results are consistent with the previous findings that the RGC  
152 dendrite targeting is determined genetically and several transcription factors controlling laminar  
153 choice have been identified in RGCs and amacrine cells (**Cherry et al. 2011; Kay et al. 2011; Lefebvre  
154 et al. 2015; Liu et al. 2018**).

155

#### 156 **IPL of *Ythdf2* cKO retina is thicker and has more synapses**

157 The increased dendrite branching of RGCs further prompted us to check whether *Ythdf2* cKO changes  
158 IPL development. Immunostaining of P6 retina vertical sections using a MAP2 antibody demonstrated  
159 that IPL thickness significantly increased in *Ythdf2* cKO retina (*Figure 4A,B*). As a control, the  
160 thicknesses of other retinal layers showed no difference between the *Ythdf2* cKO and control mice  
161 (*Figure 4—figure supplement 1A-D*). Quantification of MAP2 IF intensity in IPL suggested that the IPL  
162 of *Ythdf2* cKO retina became denser with dendrites (*Figure 4A,C*). These results suggest that the  
163 increased dendrite branching results in a thicker and denser IPL in the *Ythdf2* cKO retina.

164 The inner plexiform layer (IPL) of retina is concentrated with synaptic connections, which  
165 contain synapses among and between bipolar-amacrine-ganglion cells. The increased RGC dendrite  
166 branching and denser IPL in the *Ythdf2* cKO retina prompted us to wonder whether there are  
167 changes in synaptic connections in IPL. We used co-staining of the presynaptic marker Bassoon and  
168 the postsynaptic marker PSD-95 to count the colocalization puncta of Bassoon<sup>+</sup>/PSD-95<sup>+</sup>. We found  
169 that the numbers of Bassoon<sup>+</sup>/PSD-95<sup>+</sup> excitatory synapses in IPL of *Ythdf2* cKO retina are  
170 significantly larger than that of control retina (*Figure 4D,E*). As a control, the numbers of the  
171 excitatory ribbon synapses marked by the colocalization of Bassoon<sup>+</sup>/PSD-95<sup>+</sup> in OPL (outer plexiform  
172 layer) show no difference between *Ythdf2* cKO and control retinas (*Figure 4—figure supplement 1E,F*).

173 All these data verify that the IPL of *Ythdf2* cKO retina is thicker and has more synapses.

174

#### 175 **Visual acuity is improved for the *Ythdf2* cKO mice**

176 The features of RGC dendrites, including their size, shape, arborization pattern and localization,  
177 influence the amount and type of synaptic inputs that RGCs receive, which in turn determine how  
178 RGCs respond to specific visual stimuli such as the direction of motion (**Liu and Sanes 2017**). The  
179 increased dendrite branching, the thicker and denser IPL, and the more synapses in the IPL inspired  
180 us to further explore whether the visual responses of the *Ythdf2* cKO mice were changed or not.  
181 *Ythdf2* cKO mice looked normal and had similar body weight and size compared with control mice for  
182 either sex (male in *Figure 5A,B*; female in *Figure 5C,D*). The generally normal development of *Ythdf2*  
183 cKO mice is consistent with the specific and limited expression of *Six3-cre* in retina (*Figure 5—figure*  
184 *supplement 1A*), and only sparse spots in ventral forebrain (*Figure 5—figure supplement 1B*) (**Furuta**  
185 **et al. 2000**). We used an optomotor response (OMR)-based assay (**Prusky et al. 2004; Umino et al.**  
186 **2008; Shi et al. 2018**) to monitor visual functions of *Ythdf2* cKO mice (*Figure 5E*). Surprisingly, the  
187 *Ythdf2* cKO mice showed modestly improved visual acuity compared with the control mice,  
188 measuring spatial frequency threshold as  $0.45 \pm 0.0043$  c/deg (cycle per degree) and  $0.43 \pm 0.0085$   
189 c/deg, respectively (*Figure 5F*, male mice). Similar phenotype was observed in female mice (*Figure*  
190 *5G*). These results suggest that the visual acuity is modestly improved in the *Ythdf2* cKO mice.

191 This phenotype is most likely attributed to the increased RGC dendrite branching and thicker  
192 and denser IPL with more synapses because all other parts and processes of retina are not affected  
193 except RGC dendrite in the *Ythdf2* cKO mediated by *Six3-cre* (*Figure 2—figure supplement 1 and*  
194 *Figure 4—figure supplement 1*). The eyes and optic fibers also showed no difference between *Ythdf2*  
195 cKO and control mice (*Figure 5—figure supplement 1C-E*). We further checked the targeting of optic  
196 nerves to the brain by anterograde labeling with cholera toxin subunit B (CTB) and found no  
197 difference of retinogeniculate or retinocollicular projections between *Ythdf2* cKO and control mice  
198 (*Figure 5—figure supplement 1F,G*), suggesting the guidance and central targeting of RGC axons are  
199 not affected in the *Ythdf2* cKO.

200

201 **YTHDF2 target mRNA were identified with transcriptomic and proteomic analysis**



202 Next, we continued to explore the underlying molecular mechanisms of the effects on dendrite  
203 branching caused by *Ythdf2* cKO in the retina. First, we wanted to know what transcripts YTHDF2  
204 recognizes and binds. We carried out anti-YTHDF2 RNA immunoprecipitation (RIP) in the retina  
205 followed by RNA sequencing of the elute (RIP-Seq). Two biological replicates of anti-YTHDF2 RIP-Seq  
206 identified 1638 transcripts (*Supplementary file 1*). Functional annotation of YTHDF2 RIP targets  
207 revealed significant enrichment in Cellular Component terms such as neuron part and neuron  
208 projection, and Biological Process terms such as cellular component organization and neuron  
209 projection development. We further zoomed in to check neural terms in Cellular Component (*Figure*  
210 *6A*) and Biological Process (*Figure 6B*). We found that substantial numbers of YTHDF2 target  
211 transcripts are involved in cytoskeleton, dendrite and their organization and development (*Figure*  
212 *6A,B*), which is consistent with the dendrite branching phenotype observed in the *Ythdf2* cKO retina.

213 The working model for YTHDF2 is that it binds and destabilizes its m<sup>6</sup>A-modified target  
214 transcripts (**Wang et al. 2014**). Since the destabilization of mRNAs will eventually decrease their  
215 protein levels, we carried out proteome analysis using mass spectrometry (MS) in acute *shYthdf2*-  
216 mediated knockdown of cultured RGCs, in order to identify directly affected targets. Three biological  
217 replicates of YTHDF2 knockdown (KD) followed by MS (YTHDF2 KD/MS) identified 114 proteins which  
218 were upregulated by YTHDF2 KD (*Supplementary file 2*). Functional annotation of these proteins  
219 revealed significant enrichment in neuron development- and cytoskeleton-related terms (*Figure 6C*),  
220 which is similar to anti-YTHDF2 RIP-Seq results.

221 By overlapping the two gene lists screened from anti-YTHDF2 RIP-Seq (*Supplementary file 1*) and  
222 YTHDF2 KD/MS\_upregulation (*Supplementary file 2*), we identified a group of potential YTHDF2  
223 target mRNAs in RGCs (*Supplementary file 3*), including *Kalrn*, *Strn* and *Ubr4*. m<sup>6</sup>A modification of  
224 these mRNAs were verified by anti m<sup>6</sup>A pull down (*Figure 6D*). *Kalrn* (*Kalirin*) gene generates three  
225 alternative splicing isoforms *Kalrn7*, *Kalrn9*, and *Kalrn12* encoding guanine-nucleotide exchange  
226 factors (GEFs) for Rho GTPases (Rho-GEF), which have been shown to regulate hippocampal and  
227 cortical dendritic branching (**Xie et al. 2010; Yan et al. 2015**), and are required for normal brain

228 functions (***Penzes et al. 2001; Xie et al. 2007; Cahill et al. 2009; Russell et al. 2014; Lu et al. 2015;***  
229 ***Herring and Nicoll 2016***). Strn (Striatin) was first identified in striatum, and functions as a B subunit  
230 of the serine/threonine phosphatase PP2A and is also a core component of a multiprotein complex  
231 called STRIPAK (striatin-interacting phosphatase and kinase complex) (***Benoist et al. 2006; Li et al.***  
232 ***2018***). Strn was reported to regulate dendritic arborization only in striatal neurons but not in cortical  
233 neurons (***Li et al. 2018***). However, whether and how Kalrn and Strn work in the retina was still  
234 unknown. Ubr4 (ubiquitin protein ligase E3 component N-recogin 4) is also known as p600 and has  
235 been shown to play roles in neurogenesis, neuronal migration, neuronal signaling and survival  
236 (***Parsons et al. 2015***). However, whether Ubr4 regulates dendrite development remains elusive.

237

### 238 **YTHDF2 controls the stability of its target mRNAs which encode proteins regulating RGC dendrite** 239 **branching**

240 MS analysis after YTHDF2 KD has shown that the protein levels of these target mRNAs were  
241 upregulated (*Supplementary file 2*). IF using antibodies against Strn and Ubr4 detected specific  
242 signals in the IPL which were increased in *Ythdf2* cKO retina compared with control retina (*Figure 7—*  
243 *figure supplement 1A*). Enrichment of these proteins in IPL implies that these proteins might function  
244 locally in RGC dendrites to regulate dendrite development.

245 We next wanted to know whether YTHDF2 controlled the protein levels of these m<sup>6</sup>A-modified  
246 target mRNAs through regulation of translation or transcript stability. As shown in *Figure 7—figure*  
247 *supplement 1B-D*, the mRNA levels of *Kalrn7*, *Kalrn9*, *Kalrn12*, *Strn* and *Ubr4* were dramatically  
248 increased after KD of YTHDF2 or METTL14, supporting that YTHDF2 might regulate stability of these  
249 target mRNAs. We further evaluated potential changes in the stability of these target mRNAs in an  
250 m<sup>6</sup>A-dependent manner. We further verified this by directly measuring the stability of these target  
251 mRNAs. As shown in *Figure 7A*, all the target mRNAs showed significantly increased stability in the  
252 *Ythdf2* cKO retina compared with controls. These results suggest that YTHDF2 controlled the protein  
253 levels of its m<sup>6</sup>A-modified target mRNAs by decreasing their stability.

254 Next we explored the functions of these YTHDF2 target mRNAs in RGC dendrite development.  
255 We first generated siRNAs against these transcripts (*Figure 7—figure supplement 1E*). We then  
256 checked the effects on RGC dendrite branching after KD of these target mRNAs by siRNAs in cultured  
257 RGCs. As shown in *Figure 7B*, knockdown of *Kalrn7*, *Kalrn9*, *Kalrn12*, *Strn* or *Ubr4* led to significant  
258 decreases of RGC dendrite branching. Interestingly, the *siCocktail* against all these target mRNAs  
259 further significantly reduced the RGC dendrite branching compared with each individual siRNA  
260 (*Figure 7—figure supplement 1F*), suggesting that these targets may work in different pathways to  
261 regulate the RGC dendrite morphology. We further examined whether these target mRNAs mediate  
262 YTHDF2-regulated RGC dendrite branching. As shown in *Figure 2E-H*, and *Figure 3*, cKO of *Ythdf2* led  
263 to increased dendrite branching of RGCs both in vitro and in vivo. Transfection of siRNAs against  
264 these target mRNAs rescued dendrite branching increases in cultured *Ythdf2* cKO RGCs (*Figure 7C*).  
265 We continued to generate and performed intravitreal injection of AAV viral *shKalrn12* and *shUbr4*,  
266 which significantly rescued dendrite branching increases of CART<sup>+</sup> oODSGCs and SMI-32<sup>+</sup> αRGCs in  
267 *Ythdf2* cKO retina in vivo (*Figure 7D*).

268 Taken together, we identified a group of YTHDF2 target mRNAs that encode proteins regulating  
269 RGC dendrite branching, which mediate YTHDF2-controlled RGC dendrite branching.

270

### 271 ***Ythdf2* cKO retina is more resistant to acute ocular hypertension (AOH)**

272 The glaucomatous eyes are symptomatized with progressive neurodegeneration and vision loss  
273 (***Agostinone and Di Polo 2015***). High intraocular pressure is a major risk factor in glaucoma and has  
274 been shown to cause pathological changes in RGC dendrites before axon degeneration or soma loss  
275 is detected in different model animals (***Weber et al. 1998; Shou et al. 2003; Morgan et al. 2006***). Our  
276 findings that *Ythdf2* cKO in retina promotes RGC dendrite branching during development inspired us  
277 to wonder whether YTHDF2 also regulates RGC dendrite maintenance in the acute glaucoma model  
278 caused by acute ocular hypertension (AOH). We utilized the AOH model made with control and  
279 *Ythdf2* cKO mice to check whether *Ythdf2* cKO in the retina could alter the pathology in the

280 glaucomatous eyes. RGC dendrite branching is significantly decreased after AOH operation compared  
281 with non-AOH in either genotype (*Figure 8—figure supplement 1A,B*). Interestingly, the *Ythdf2* cKO  
282 retina with AOH operation maintains significantly higher dendrite complexity compared with the  
283 glaucomatous eyes of *Ythdf2<sup>fl/fl</sup>* control mice (*Figure 8A,B*). In addition, there are significant RGC  
284 neuron losses in both genotypes after AOH (*Figure 8C,D*). However, the reduction of RGC number in  
285 the *Ythdf2* cKO retina is less than control retina (*Figure 8C,D*). These results support that *Ythdf2* cKO  
286 protects retina from RGC dendrite degeneration and soma loss caused by AOH.

287       Next we wanted to know whether and how YTHDF2 target mRNAs mediate these effects in the  
288 AOH models. We first checked the expression of YTHDF2 target mRNAs identified in the developing  
289 retina (*Supplementary file 3*) in the adult *Ythdf2* cKO and control retina. We found that two target  
290 mRNAs *Hspa12a* and *Islr2* show upregulation in the adult *Ythdf2* cKO retina compared with control  
291 (*Figure 8—figure supplement 1C*). m<sup>6</sup>A modification of *Hspa12a* and *Islr2* mRNAs was further verified  
292 by anti-m<sup>6</sup>A pulldown (*Figure 8—figure supplement 1D*). *Hspa12a* encodes heat shock protein A12A  
293 which is an atypical member of the heat shock protein 70 family and has been shown to be  
294 downregulated in diseases such as ischemic stroke, schizophrenia, and renal cell carcinoma (**Pongrac**  
295 **et al. 2004; Mao et al. 2018; Min et al. 2020**). *Islr2* encodes immunoglobulin superfamily containing  
296 leucine-rich repeat protein 2 and is poorly studied. Here, we found that *Hspa12a* and *Islr2* are  
297 downregulated in the retina after AOH operation (*Figure 8—figure supplement 1E*), which is likely  
298 caused by upregulation of YTHDF2 in the AOH-treated retina (*Figure 8—figure supplement 1F-H*). We  
299 therefore hypothesized that AOH upregulates YTHDF2 which in turn downregulates its targets  
300 *Hspa12a* and *Islr2*, thus causing RGC dendrite degeneration and soma loss. If this is the case,  
301 overexpression of *Hspa12a* and *Islr2* might protect RGC dendrite from AOH-triggered degeneration.  
302 We thus generated AAV harboring overexpression constructs of *Hspa12a* and *Islr2* which were  
303 intravitreally injected to wild type retinas. After the AOH induction, the retinas overexpressing  
304 *Hspa12a* and *Islr2* maintain significantly more complex RGC dendrite arbor compared with control  
305 AAV (*Figure 8E,F*).

306 These data verify that loss-of-function of YTHDF2 and gain-of-function of its targets *Hspa12a*  
307 and *Islr2* have neuroprotective roles in the glaucomatous retina.

308

### 309 **Discussion**

310 Functions and mechanisms of mRNA m<sup>6</sup>A modification in the dendrite development were not known.  
311 Here, we revealed a critical role of the m<sup>6</sup>A reader YTHDF2 in RGC dendrite development and  
312 maintenance. YTHDF2 have two phases of function to control RGC dendrite development first and  
313 then maintenance through regulating two sets of target mRNAs. In early postnatal stages, the target  
314 mRNAs *Kalrn7*, *Kalrn9*, *Kalrn12*, *Strn* and *Ubr4* mediate YTHDF2 functions to regulate RGC dendrite  
315 development. In the adult mice, another set of target mRNAs *Hspa12a* and *Islr2* mediate YTHDF2  
316 function to regulate RGC dendrite maintenance.

317

### 318 **Positive and negative regulators for dendrite development**

319 The general principle for dendrite arborization is that the dendrite arbor cannot be either too big or  
320 too small in order to precisely sample a presynaptic target area during neural circuit formation  
321 (*Lefebvre et al. 2015*). Numerous extrinsic and intrinsic mechanisms have been found to regulate  
322 dendritic arbor patterning, which involves both positive and negative factors to achieve balanced  
323 control of dendritic growth (*Jan and Jan 2010; Dong et al. 2015; Ledda and Paratcha 2017*). For the  
324 secreted and diffusible cues, BDNF promotes dendrite branching and complexity (*Cheung et al. 2007*);  
325 the non-canonical Wnt7b/PCP pathway is a positive regulator of dendrite growth and branching  
326 (*Rosso et al. 2005*); the non-canonical Wnt receptor Ryk works as a negative regulator by limiting the  
327 extent of dendritic branching (*Lanoue et al. 2017*). For the contact-mediated signals, the cadherins  
328 *Celsr2* and *Celsr3* regulate dendrite growth in an opposite manner in cortical pyramidal and Purkinje  
329 neurons, and hippocampal neurons, respectively (*Shima et al. 2004; Shima et al. 2007*). For the  
330 transcription factors, studies have shown that manipulation of *Cux1* and *Cux2* levels has distinct  
331 effects on apical and basal arbors of cortical dendrites (*Cubelos et al. 2015*); interestingly, the

332 functions of Sp4 in dendrite development are dependent on the cellular context of its expression, e.g.  
333 Sp4 promotes dendrite growth and branching in hippocampal dentate granule cells but limits  
334 dendrite branching in cerebellar granule cells (*Ramos et al. 2007; Zhou et al. 2007*). Here we  
335 identified another negative regulator YTHDF2 which works posttranscriptionally, and loss-of-function  
336 of YTHDF2 increased dendrite complexity during development and protected RGC degeneration from  
337 AOH.

338

### 339 **Posttranscriptional regulation of dendrite development**

340 It is well established that mRNAs can be transported and targeted to specific neuronal compartments  
341 such as axons and dendrites. Local translation of these mRNAs enables exquisite and rapid control of  
342 local proteome in specific subcellular compartments (*Ledda and Paratcha 2017*). Local translation is  
343 known to play roles in controlling dendrite arborization (*Chihara et al. 2007*), and is regulated by  
344 specific RNA-binding proteins (*Jan and Jan 2010*). In Drosophila, the RNA binding proteins  
345 Pumilio (Pum), Nanos (Nos), Glorund (Glo) and Smaug (Smg) regulate morphogenesis and branching  
346 of specific classes of dendritic arborization (da) neurons through controlling translation of their  
347 target mRNAs including *nanos* mRNA itself (*Ye et al. 2004; Brechbiel and Gavis 2008*). The mouse  
348 homologue of another RNA-binding protein Staufeu, *Stau1*, regulates dendritic targeting of  
349 ribonucleoprotein particles and dendrite branching (*Vessey et al. 2008*). Here we found that the m<sup>6</sup>A  
350 reader and RNA-binding protein YTHDF2 controls stability of its target mRNAs and regulates dendrite  
351 branching in RGCs. It would be interesting to see whether these target mRNAs are localized into  
352 dendrites and whether YTHDF2 works in dendrites to control their stability and translation. Actually,  
353 *Strn4* mRNA has been shown to be present in dendrites and locally translated (*Lin et al. 2017*). In  
354 addition, how the proteins encoded by these target mRNAs regulate RGC dendrite branching during  
355 development and maintenance remains to be explored and will be important future directions.

356

### 357 **Neuroprotective genes in retinal injuries and degeneration**

358 Transcriptome analyses have revealed differentially expressed genes after retinal injuries such as  
359 AOH-induced glaucoma and optic nerve crush (ONC), and the up-regulated genes are of importance  
360 for discovering new treatment approaches (**Jakobs 2014; Tran et al. 2019**). One of the previous  
361 studies has identified *Mettl3*, encoding the m<sup>6</sup>A writer, as an up-regulated gene after ONC (**Agudo et**  
362 **al. 2008**). Here we found *Ythdf2*, encoding an m<sup>6</sup>A reader, was also up-regulated in the retina after  
363 AOH. We further found that *Hspa12a* and *Islr2*, two targets of YTHDF2 in adult retina, were  
364 downregulated in glaucomatous retinas. Overexpression of *Hspa12a* and *Islr2* protected retina from  
365 AOH-caused RGC dendrite degeneration. Our findings in this study suggest that YTHDF2 and its  
366 neuroprotective target mRNAs might be valuable in developing novel therapeutic approaches to  
367 treat neurodegeneration caused by glaucoma and other retinal injuries.

368

## 369 **Materials and methods**

### 370 **Key resources table**

| Reagent type (species) or resource      | Source or reference      | Identifiers                            |
|-----------------------------------------|--------------------------|----------------------------------------|
| <b>Antibodies</b>                       |                          |                                        |
| Chicken polyclonal anti-GFP             | Abcam                    | Cat#: ab13970, RRID: AB_300798         |
| Chicken polyclonal anti-MAP2            | Abcam                    | Cat#: ab5392, RRID: AB_2138153         |
| Guinea pig polyclonal anti-RBPMS        | PhosphoSolutions         | Cat#: 1832-RBPMS, RRID: AB_2492226     |
| Goat polyclonal anti-VACHT              | Millipore                | Cat#: ABN100, RRID: AB_2630394         |
| Mouse monoclonal anti-β Actin           | Abcam                    | Cat#: ab6276, RRID: AB_2223210         |
| Mouse monoclonal anti-β Actin           | ABclonal                 | Cat#: AC004, RRID: AB_2737399          |
| Mouse monoclonal anti-AP2α              | DSHB                     | Cat#: 3B5, RRID: AB_2313947            |
| Mouse monoclonal anti-Bassoon           | Enzo Life Sciences       | Cat#: ADI-VAM-PS003, RRID: AB_10618753 |
| Mouse monoclonal anti-Brn3a             | Millipore                | Cat#: MAB1585, RRID: AB_94166          |
| Mouse monoclonal anti-Calbindin-D-28K   | Sigma-Aldrich            | Cat#: C9848, RRID: AB_476894           |
| Mouse monoclonal anti-PKCα              | Santa Cruz Biotechnology | Cat#: sc-8393, RRID: AB_628142         |
| Mouse monoclonal anti-SMI-32            | BioLegend                | Cat#: 801701, RRID: AB_2564642         |
| Mouse monoclonal anti-Strn (Striatin)   | BD Biosciences           | Cat#: 610838, RRID: AB_398157          |
| Rabbit polyclonal anti-CART             | Phoenix Pharmaceuticals  | Cat#: H-003-62, RRID: AB_2313614       |
| Rabbit polyclonal anti m <sup>6</sup> A | Synaptic Systems         | Cat# 202003, RRID: AB_2279214          |
| Rabbit polyclonal anti-Melanopsin       | Thermo Fisher Scientific | Cat#: PA1-780, RRID: AB_2267547        |
| Rabbit polyclonal anti-PKCα             | Cell Signaling           | Cat#: CST-2056                         |

|                                   |                          |                                     |
|-----------------------------------|--------------------------|-------------------------------------|
| Mouse monoclonal anti-PSD-95      | Abcam                    | Cat#: ab2723, RRID: AB_303248       |
| Rabbit polyclonal anti-Recoverin  | Millipore                | Cat#: AB5585, RRID: AB_2253622      |
| Rabbit polyclonal anti-YTHDF2     | Proteintech              | Cat#: 24744-1-AP, RRID: AB_2687435  |
| Rabbit polyclonal anti-YTHDF1     | Proteintech              | Cat#: 17479-1-AP, RRID: AB_2217473  |
| Rabbit polyclonal anti-YTHDF3     | Abcam                    | Cat#: ab103328, RRID: AB_10710895   |
| Rabbit polyclonal anti-Ubr4       | Abcam                    | Cat#: ab86738, RRID: AB_1952666     |
| Sheep polyclonal anti-Chx10       | Exalpha                  | Cat#: X1179P                        |
| Alexa 488 donkey anti-chicken IgY | Jackson Immunoresearch   | Cat#: 703-545-155, RRID: AB_2340375 |
| Alexa 488 donkey anti-g. pig IgG  | Jackson Immunoresearch   | Cat#: 706-545-148, RRID: AB_2340472 |
| Alexa 488 donkey anti-mouse IgG   | Thermo Fisher Scientific | Cat#: A-21202, RRID: AB_141607      |
| Alexa 488 donkey anti-rabbit IgG  | Thermo Fisher Scientific | Cat#: A-21206, RRID: AB_141708      |
| Alexa 555 donkey anti-goat IgG    | Thermo Fisher Scientific | Cat#: A-21432, RRID: AB_2535853     |
| Alexa 555 donkey anti-mouse IgG   | Thermo Fisher Scientific | Cat#: A-31570, RRID: AB_2536180     |
| Alexa 555 donkey anti-rabbit IgG  | Thermo Fisher Scientific | Cat#: A-31572, RRID: AB_162543      |
| Alexa 555 donkey anti-sheep IgG   | Thermo Fisher Scientific | Cat# A-21436, RRID: AB_2535857      |
| Alexa 555 goat anti-chicken IgY   | Thermo Fisher Scientific | Cat#: A-21437, RRID: AB_2535858     |
| Alexa 647 donkey anti-mouse IgG   | Thermo Fisher Scientific | Cat#: A-31571, RRID: AB_162542      |
| HRP donkey anti-mouse IgG         | Abcam                    | Cat#: ab97030, RRID: AB_10680919    |
| HRP donkey anti-rabbit IgG        | Abcam                    | Cat#: ab16284, RRID: AB_955387      |
| HRP VHH anti-mouse IgG            | AlpaLife                 | Cat#: KTSM1321                      |
| HRP VHH anti-rabbit IgG           | AlpaLife                 | Cat#: KTSM1322                      |

#### Chemicals, Peptides, and Recombinant Proteins

|                                                                               |          |                   |
|-------------------------------------------------------------------------------|----------|-------------------|
| TRIzol Reagent                                                                | Life     | Cat#: 15596018    |
| PrimeScript™ RT Master Mix                                                    | Takara   | Cat#: RR036B      |
| 2× ChamQ™ Universal SYBR qPCR Master Mix                                      | Vazyme   | Cat#: Q711-02     |
| DMEM, high glucose                                                            | Gibco    | Cat#: 11965-092   |
| Dulbecco's Modified Eagle's Medium, 10×, low glucose                          | Sigma    | Cat#: D2429       |
| DMEM, high glucose                                                            | Hyclone  | Cat#: SH30022.01  |
| Fetal Bovine Serum (FBS)                                                      | Gibco    | Cat#: 10270-106   |
| Dulbecco's Phosphate-Buffered Saline, 1× without calcium and magnesium (DPBS) | Corning  | Cat#: 21-031-CVR  |
| poly-D-lysine, Cultrex                                                        | Trevigen | Cat#: 3439-100-01 |
| Laminin (mouse), Culrex                                                       | Trevigen | Cat#: 3400-010-01 |
| DMEM/F-12, GlutaMAX™                                                          | Gibco    | Cat#: 10565-018   |
| Neurobasal™ Medium, minus phenol red                                          | Gibco    | Cat#: 12348-017   |
| Penicillin-Streptomycin                                                       | Life     | Cat#: 15140-122   |
| B27 serum-free supplement, 50×                                                | Life     | Cat#: 17504044    |
| N-2 Supplement, 100×                                                          | Gibco    | Cat#: 17502-048   |
| Insulin                                                                       | Sigma    | Cat#: I6634       |
| cpt-cAMP, 8-(4-Chlorophenylthio) Adenosine 3':5'-CY                           | Sigma    | Cat#: C3912       |



|                                                                               |                          |                                  |
|-------------------------------------------------------------------------------|--------------------------|----------------------------------|
| N-acetyl-L-cysteine (NAC)                                                     | Sigma                    | Cat#: A8199                      |
| Forskolin                                                                     | Sigma                    | Cat#: F6886                      |
| Recombinant Human/Murine/Rat BDNF                                             | PeproTech                | Cat#: 450-02                     |
| Recombinant Human NT-3                                                        | PeproTech                | Cat#: 450-03                     |
| Recombinant Murine EGF                                                        | PeproTech                | Cat#: 315-09                     |
| Recombinant Human FGF-basic                                                   | PeproTech                | Cat#: 100-18B                    |
| Puromycin                                                                     | Thermo Fisher Scientific | Cat#: A11138-03                  |
| Puromycin                                                                     | Sigma                    | Cat#: P8833                      |
| Paraformaldehyde                                                              | Vetec                    | Cat#: V900894-100G               |
| O.C.T. Compound and Cryomolds, Tissue-Tek                                     | SAKURA                   | Cat#: 4583                       |
| ChemiBLOCKER                                                                  | Millipore                | Cat#: 2170                       |
| Triton x-100                                                                  | Sigma                    | Cat#: V900502                    |
| CTB (Cholera Toxin Subunit B) conjugated by Alexa Fluor™ 555                  | Invitrogen               | Cat#: C34776                     |
| VECTASHIELD Antifade Mounting Medium with DAPI                                | Vector Laboratory        | Cat#: H-1200                     |
| Mounting Medium, antifading (with DAPI)                                       | Solarbio                 | Cat#: S2110                      |
| Normal Goat Serum                                                             | Novus                    | Cat#: NBP2-23475                 |
| <b>Critical Commercial Assays</b>                                             |                          |                                  |
| Pierce™ BCA Protein Assay Kit                                                 | Thermo Fisher Scientific | Cat#: 23227                      |
| GeneSilencer® Transfection Reagent                                            | Genlantis                | Cat#: T500750                    |
| Magna MeRIP™ m <sup>6</sup> A Kit                                             | Millipore                | Cat#: 17-10499                   |
| EZ-Magna RIP™ RNA-Binding Protein Immunoprecipitation Kit                     | Millipore                | Cat#: 17-701                     |
| <b>Experimental Models: Cell Lines</b>                                        |                          |                                  |
| HEK293T                                                                       | ATCC                     | Cat#: CRL-11268, RRID: CVCL_1926 |
| <b>Experimental Models: Organisms/Strains</b>                                 |                          |                                  |
| Mouse: <i>Ythdf2</i> <sup>fl/fl</sup>                                         | <b>(Yu et al. 2021)</b>  | N/A                              |
| Mouse: Tg(Six3-cre)69Frt <sup>y</sup> /GcoJ                                   | Jackson Laboratory       | Cat#: JAX_019755                 |
| Mouse: B6.Cg-Tg(Thy1-EGFP)OJrs/GfngJ                                          | Jackson Laboratory       | Cat#: JAX_007919                 |
| Mouse: B6.129X1-Gt(ROSA)26Sor <sup>tm1(EYFP)Cos</sup> /J                      | Jackson Laboratory       | Cat#: JAX_006148                 |
| <b>Oligonucleotides</b>                                                       |                          |                                  |
| shRNA targeting sequence of negative control:<br>GCATCAAGGTGAACTTCAAGA        | This paper               | N/A                              |
| shRNA targeting sequence of mouse <i>Ythdf2</i> : GGACGTTCCCAATAGCCAAC        | <b>(Yu et al. 2018)</b>  | N/A                              |
| shRNA targeting sequence of mouse <i>Ythdf1</i> :<br>GGACATTGGTACTTGGGATAA    | This paper               | N/A                              |
| shRNA targeting sequence of mouse <i>Mettl14#6</i> :<br>GCTGGACCTGGGATGATATTA | This paper               | N/A                              |

|                                                                                                               |                               |     |
|---------------------------------------------------------------------------------------------------------------|-------------------------------|-----|
| shRNA targeting sequence of mouse <i>Mettl14#7</i> :<br>CCCAGCTTGACTTTGCTTTA                                  | This paper                    | N/A |
| shRNA targeting sequence of negative control (AAV):<br>TTCTCCGAACGTGTCACGTAA                                  | This paper                    | N/A |
| shRNA targeting sequence of mouse <i>Kalrn12</i> : TGATGAGCTGATGGAAGAA                                        | This paper                    | N/A |
| shRNA targeting sequence of mouse <i>Ubr4</i> : AATGATGAGCAGTCATCTC                                           | This paper                    | N/A |
| shRNA targeting sequence of mouse <i>Ythdf3</i> : GGATTTGGCAATGATACTTTG                                       | This paper                    | N/A |
| siRNA targeting sequence of negative control:<br>UUCUCCGAACGUGUCACGUTT                                        | <b>(Yu et al. 2018)</b>       | N/A |
| siRNA targeting sequence of mouse <i>Kalrn7</i> :<br>AGUACAAUCCUGGCCAUGUTT                                    | <b>(Xie et al. 2007)</b>      | N/A |
| siRNA targeting sequence of mouse <i>Kalrn9</i> :<br>ACUGGACUGGACUUCUAUUTT                                    | <b>(Yan et al. 2015)</b>      | N/A |
| siRNA targeting sequence of mouse <i>Kalrn12</i> :<br>CGAUGAGCUGAUGGAAGAATT                                   | <b>(Yan et al. 2015)</b>      | N/A |
| siRNA targeting sequence of mouse <i>Strn</i> : GGUGAAGAUCGAGAUACAATT                                         | <b>(Breitman et al. 2008)</b> | N/A |
| siRNA targeting sequence of mouse <i>Ubr4</i> : AAUGAUGAGCAGUCAUCUATT                                         | <b>(Shim et al. 2008)</b>     | N/A |
| qPCR primers of mouse <i>18s</i><br>Fwd:<br>GCTTAATTTGACTCAACACGGGA<br>Rev:<br>AGCTATCAATCTGTCAATCCTGTC       | <b>(Wang et al. 2018)</b>     | N/A |
| qPCR primers of mouse <i>Gapdh</i><br>Fwd:<br>TTGTCAGCAATGCATCCTGCACCACC<br>Rev:<br>CTGAGTGGCAGTGATGGCATGGAC  | <b>(Mains et al. 2011)</b>    | N/A |
| qPCR primers of mouse <i>Ythdf2</i><br>Fwd:<br>GAGCAGAGACCAAAGGTCAAG<br>Rev: CTGTGGGCTCAAGTAAGGTTTC           | This paper                    | N/A |
| qPCR primers of mouse <i>Kalrn7</i><br>Fwd:<br>GATACCATATCCATTGCCTCCAGGACC<br>Rev:<br>CCAGGCTGCGCGCTAAACGTAAG | <b>(Mains et al. 2011)</b>    | N/A |
| qPCR primers of mouse <i>Kalrn9</i><br>Fwd: GCCCCTCGCCAAAGCCACAGC<br>Rev: CCAGTGAGTCCCCTGGTGGGC               | <b>(Mains et al. 2011)</b>    | N/A |

|                                                                                                                       |                                |                                                                                    |
|-----------------------------------------------------------------------------------------------------------------------|--------------------------------|------------------------------------------------------------------------------------|
| qPCR primers of mouse <i>Kalrn12</i><br>Fwd: CAGCAGCCACGTGCCTGCAGC<br>Rev:<br>TCTTGACATTGGGAATGGGCCGCAC               | <b>(Mains et al. 2011)</b>     | N/A                                                                                |
| qPCR primers of mouse <i>Strn</i><br>Fwd: TGAAGCCTGGAATGTGGACC<br>Rev: CTATTGGCCTCTTCACCCC                            | This paper                     | N/A                                                                                |
| qPCR primers of mouse <i>Ubr4</i><br>Fwd: TGAGTGAGGACAAGGGCAAC<br>Rev: GGGTTGGATCGAACGAAGGT                           | This paper                     | N/A                                                                                |
| qPCR Primer for mouse <i>Hspa12a</i><br>Fwd: GGGTTTGACAGGCTAAGGA<br>Rev: TCTGATGGACGGTCAGGTCT                         | This paper                     | N/A                                                                                |
| qPCR Primer for mouse <i>Islr2</i><br>Fwd: GAAGCTCCCTTAGACTGTCACC<br>Rev: CCCCATCGTGACTCCTGCTG                        | This paper                     | N/A                                                                                |
| PCR Primer for mouse <i>Hspa12a</i> CDS<br>Fwd: ATGGCGGACAAGGAAGCTGG<br>Rev: GTAATTTAAGAAGTCGATCCCC                   | This paper                     | N/A                                                                                |
| PCR Primer for mouse <i>Islr2</i> CDS<br>Fwd: ATGGGGCCCTTTGGAGC<br>Rev: GCCCGCTGTCTGCCTGTAG                           | This paper                     | N/A                                                                                |
| Mouse genotyping primers for <i>Ythdf2</i> loxp site 1:<br>GCTTGTAGTTATGTTGTGTACCAC and<br>GCAGCTCTGACTATTCTAAAACCTCC | This paper                     | N/A                                                                                |
| Mouse genotyping primers for <i>Ythdf2</i> loxp site 2:<br>CTCATAACATCCATAGCCACAGG and<br>CCAAGAGATAGCTTTCCTAATG      | This paper                     | N/A                                                                                |
| Mouse genotyping primers for <i>Six3-cre</i> : CCTTCCTCCCTCTATGTG and<br>GAACGAACCTGGTCGAAATC                         | Chunqiao Liu's lab             | N/A                                                                                |
| Mouse genotyping primers for <i>Thy1-GFP</i> : CGGTGGTGCAGATGAACTT and<br>ACAGACACACCCAGGACA                          | The Jackson Laboratory website | N/A                                                                                |
| Mouse genotyping primers for Rosa-YFP mutant site:<br>AGGGCGAGGAGCTGTTC and<br>TGAAGTCGATGCCCTTCAG                    | The Jackson Laboratory website | N/A                                                                                |
| Mouse genotyping primers for Rosa-YFP wildtype site:<br>CTGGCTTCTGAGGACCG and<br>CAGGACAACGCCACACA                    | The Jackson Laboratory website | N/A                                                                                |
| <b>Recombinant DNA</b>                                                                                                |                                |                                                                                    |
| Plasmid: pLKO.1-TRC                                                                                                   | Addgene                        | Addgene plasmid #10878, RRID: Addgene_10878                                        |
| <b>Software and Algorithms</b>                                                                                        |                                |                                                                                    |
| GraphPad Prism 7.0                                                                                                    | GraphPad                       | <a href="https://www.graphpad.com">https://www.graphpad.com</a> , RRID: SCR_002798 |

|               |                                   |                                                                                     |
|---------------|-----------------------------------|-------------------------------------------------------------------------------------|
| STAR v2.5     | ( <i>Dobin et al. 2013</i> )      | <a href="https://github.com/alexdobin/STAR/">https://github.com/alexdobin/STAR/</a> |
| HTSeq         | ( <i>Anders et al. 2015</i> )     | <a href="https://pypi.org/project/HTSeq/">https://pypi.org/project/HTSeq/</a>       |
| ImageJ (Fiji) | ( <i>Schindelin et al. 2012</i> ) | <a href="http://fiji.sc">http://fiji.sc</a> , RRID:SCR_002285                       |
| Matlab        | Matlab                            | <a href="https://ww2.mathworks.cn">https://ww2.mathworks.cn</a>                     |

371

## 372 **Animals and generation of the *Ythdf2* cKO mice**

373 *Ythdf2*<sup>f/f</sup> mice were reported previously (*Yu et al. 2021*). *Six3-cre* (*Furuta et al. 2000*), *Thy1-GFP*  
374 (*Feng et al. 2000*) and *Rosa26-eYFP* (*Srinivas et al. 2001*) mice were from Jackson Laboratory. For  
375 timed pregnancy, embryos were identified as E0.5 when a copulatory plug was observed. Genotyping  
376 primers are as following: the first *Ythdf2-loxP* site, 5'-GCTTGTAGTTATGTTGTGTACCAC-3' and 5'-  
377 GCAGCTCTGACTATTCTAAAACCTCC-3'; the second *Ythdf2-loxP* site, 5'-  
378 CTCATAACATCCATAGCCACAGG-3' and 5'-CCAAGAGATAGCTTTCCTAATG-3'.  
379 *Six3-cre* site, 5'-CCTCCTCCCTCTCTATGTG-3' and 5'-GAACGAACCTGGTCGAAATC-3'.  
380 *Rosa26-eYFP* wild type site, 5'-CTGGCTTCTGAGGACCG-3' and 5'-CAGGACAACGCCACACA-3'; the  
381 mutant site, 5'-AGGGCGAGGAGCTGTTC-3' and 5'-TGAAGTCGATGCCCTTCAG-3'. All experiments  
382 using mice were carried out following the animal protocols approved by the  
383 Laboratory Animal Welfare and Ethics Committee of Southern University of Science and Technology.

384

## 385 **Retinal neuronal culture**

386 Retinal neurons were dissociated from E14.5-15.5 mouse embryos by papain in DPBS (1× Dulbecco's  
387 Phosphate-Buffered Saline, Corning) following the previously described methods (*Kechad et al. 2012*),  
388 and neuronal suspension was plated on acid-washed glass coverslips pre-coated with poly-D-lysine  
389 (Trevigen, 100 µg/ml) for 1 hr and laminin (Trevigen, 5 µg/ml) overnight at 37°C. Culture medium was  
390 made up of half DMEM/F12 medium (Gibco) and half neurobasal medium (Gibco), supplemented  
391 with B27 supplement (Life, 0.5×), penicillin-streptomycin (Life, 1×), N-2 supplement (Gibco, 0.5×), N-  
392 acetyl-L-cysteine (Sigma, NAC 0.6 mg/ml), cpt-cAMP (Sigma, 100 µM), forskolin (Sigma, 10 µM), and  
393 insulin (Sigma, 25 µg/ml). EGF (PeproTech, 50 ng/ml), BDNF (PeproTech, 50 ng/ml), NT-3 (PeproTech,  
394 25 ng/ml), and FGF-basic (PeproTech, 10 ng/ml) were freshly added before using.

395

396 **Knockdown using lentiviral shRNA, siRNA or AAV shRNA, and overexpression using AAV system**

397 Lentiviral knockdown plasmids encoding shRNA (*shCtrl*: 5'-GCATCAAGGTGAACTTCAAGA-3'; *shYthdf2*:

398 5'-GGACGTTCCCAATAGCCAACT-3'; *shYthdf1*: 5'- GGACATTGGTACTTGGGATAA-3'; *shYthdf3*: 5'-

399 GGATTTGGCAATGATACTTTG-3'; *shMettl14#6*: 5'-GCTGGACCTGGGATGATATTA-3'; *shMettl14#7*: 5'-

400 CCCAGCTTGACTTTGCTTTA-3') were generated from pLKO.1-TRC and lentivirus preparation process

401 was described previously (**Yu et al. 2018**). All siRNA were chosen from previous studies and the

402 target sequences of siRNA are as following: *siCtrl* (RNAi negative control): 5'-

403 UUCUCCGAACGUGUCACGUTT-3' (**Yu et al. 2018**); *siKalrn7*: 5'- AGUACAAUCCUGGCAUGUTT-3' (**Xie**

404 **et al. 2007**); *siKalrn9*: 5'-ACUGGACUGGACUUCUAUUTT-3' (**Yan et al. 2015**); *siKalrn12*: 5'-

405 CGAUGAGCUGAUGGAAGAATT-3' (**Yan et al. 2015**); *siStrn*: 5'-GGUGAAGAUCGAGAUACAATT-3'

406 (**Breitman et al. 2008**); *siUbr4*: 5'-AAUGAUGAGCAGUCAUCUATT-3' (**Shim et al. 2008**). AAV

407 knockdown plasmids encoding shRNA (*shCtrl*: 5'-TTCTCCGAACGTGTACGTAA-3'; *shKalrn12*: 5'-

408 TGATGAGCTGATGGAAGAA-3'; *shUbr4*: 5'-AATGATGAGCAGTCATCTC-3') were generated using

409 pHBAAV-U6-MCS-CMV-EGFP and packaged in serotype-9 by Hanbio ( $1.5 \times 10^{12}$  genomic copies per ml).

410 AAV overexpression plasmids of *Hspa12a* (NM\_175199.3; PCR primer for mouse *Hspa12a*: 5'-

411 ATGGCGGACAAGGAAGCTGG-3' and 5'-GTAATTTAAGAAGTCGATCCCC-3') and *Islr2* (NM\_001161541.1;

412 PCR Primer for mouse *Islr2*: 5'-ATGGGGCCCTTTGGAGC-3' and 5'-GCCCGCTGTCTGCCTGTAG-3') were

413 generated from pHBAAV-CMV-MCS-3flag-T2A-ZsGreen and packaged serotype-9 by Hanbio ( $1.2 \times 10^{12}$

414 genomic copies per ml).

415 GeneSilencer® Transfection Reagent (Genlantis) was used in siRNA transfection following the

416 manufacturer's protocols. Culture medium was changed after 1 day of lentiviral shRNA infection or

417 siRNA transfection. For lentiviral shRNA assay, puromycin (Thermo or Sigma, 1 µg/ml) was added

418 after 2 days of infection. Immunofluorescence, RNA or protein preparation was performed after

419 shRNA or siRNA worked for 3 days. For AAV intravitreal injection, P0-P1 mouse pups were

420 anesthetized in ice and then eyes were pierced at the edge of corneal by 30G × 1/2 needle (BD,

421 305106) under stereomicroscope. Then 1  $\mu$ l AAV was intravitreally injected with 10  $\mu$ l Syringe  
422 (Hamilton, 80330) following the pinhole. P15 or adult mice were anesthetized with 2.5% Avertin and  
423 then eyes were pierced at the side of corneal and the outer segment of sclera by 30G  $\times$  1/2 needle  
424 successively. 2  $\mu$ l AAV was intravitreally injected with 10  $\mu$ l Syringe following the pinhole on the  
425 sclera. All subsequent experiments such as acute ocular hypertension operation and immunostaining  
426 were carried out after at least 3 weeks (10 days for ZsGreen/CART labeling of ooDSGCs in *Ythdf2* cKO  
427 and control mice in *Figure 3A*).

428

#### 429 **RT-qPCR**

430 Total RNA was extracted from cells or tissues with TRIzol Reagent (Life) and then used for reverse  
431 transcription by PrimeScript<sup>TM</sup> RT Master Mix (TaKaRa). Synthesized cDNA was used for qPCR by 2 $\times$   
432 ChamQ<sup>TM</sup> Universal SYBR qPCR Master Mix (Vazyme) on StepOnePlus<sup>TM</sup> Real-Time PCR System (ABI)  
433 or BioRad CFX96 Touch Real-Time PCR system. Primers used for qPCR are as following: mouse *Gapdh*:  
434 5'-TTGTCAGCAATGCATCCTGCACCACC-3' and 5'-CTGAGTGGCAGTGATGGCATGGAC-3' (**Mains et al.**  
435 **2011**); mouse *Kalrn7*: 5'- GATACCATATCCATTGCCTCCAGGACC-3' and 5'-  
436 CCAGGCTGCGCGCTAAACGTAAG-3' (**Mains et al. 2011**); mouse *Kalrn9*: 5'-  
437 GCCCCTCGCCAAAGCCACAGC-3' and 5'-CCAGTGAGTCCCGTGGTGGGC-3' (**Mains et al. 2011**); mouse  
438 *Kalrn12*: 5'- CAGCAGCCACGTGCCTGCAGC-3' and 5'-TCTTGACATTGGGAATGGGCCGCAC-3' (**Mains et al.**  
439 **2011**); mouse *Strn*: 5'-TGAAGCCTGGAATGTGGACC-3' and 5'-CTATTGGCCTCTTCACCCC-3'; mouse  
440 *Ubr4*: 5'- TGAGTGAGGACAAGGGCAAC-3' and 5'-GGGTTGGATCGAACGAAGGT-3'; mouse *Ythdf2*: 5'-  
441 GAGCAGAGACCAAAGGTCAAG-3'and 5'-CTGTGGGCTCAAGTAAGGTTC-3'; 18s: 5'-  
442 GCTTAATTTGACTCAACACGGGA-3' and 5'-AGCTATCAATCTGTCAATCCTGTC-3' (**Wang et al. 2018**);  
443 mouse *Hspa12a*: 5'-GGGTTTGCACAGGCTAAGGA-3' and 5'-TCTGATGGACGGTCAGGTCT-3'; mouse *Islr2*:  
444 5'-GAAGCTCCCTTAGACTGTCACC-3' and 5'-CCCCATCGTGACTCCTGCTG-3'.

445

#### 446 **Immunofluorescence and immunostaining**

447 For tissue sections, mouse embryonic eyes were fixed with 4% PFA (Sigma) in 0.1 M Phosphate Buffer  
448 (PB) for 30-45 min at room temperature (RT); eyes of mouse pups (< P10) were pre-fixed briefly and  
449 then eyecups were dissected and fixed for 45 min-1 hr at RT; for P20-30 or adult mice, eyecups were  
450 dissected after myocardial perfusion with 0.9% NaCl, followed by fixation for 1 hr. After PBS (3 × 5  
451 min) washing, tissues were dehydrated with 30% sucrose in 0.1 M PB overnight at 4°C, then  
452 embedded with O.C.T. (SAKURA) and cryosectioned at 12 μm (20 μm for Thy1-GFP section analysis)  
453 with Leica CM1950 Cryostat. Tissue sections were permeabilized and blocked with 10%  
454 ChemiBLOCKER (Millipore) and 0.5% Triton x-100 (Sigma) in PBS (PBST) for 1 hr at RT and incubated  
455 in PBST overnight at 4°C with following primary antibodies: chicken anti-GFP (1:1000, Abcam  
456 ab13970), chicken anti-MAP2 (1:10000, Abcam ab5392), goat anti-VACHT (1:1000, Millipore ABN100),  
457 guinea pig anti-RBPMS (1:1000, PhosphoSolutions 1832-RBPMS), mouse anti-AP2α (1:1000, DSHB  
458 3B5), mouse anti-Bassoon (1:2500, Enzo Life Sciences ADI-VAM-PS003), mouse anti-Brn3a (1:300,  
459 Millipore MAB1585), mouse anti-Calbindin-D-28K (1:200, Sigma C9848), mouse anti-PKCα (1:500,  
460 Santa Cruz sc-8393), rabbit anti-Strn (Striatin) (1:500, BD Biosciences 610838), rabbit anti-CART  
461 (1:2000, Phoenix Pharmaceuticals H-003-62), rabbit anti-m<sup>6</sup>A (1:200, Synaptic Systems 202003),  
462 rabbit anti-melanopsin (1:1000, Thermo PA1-780), rabbit anti-PKCα (1:1000, Cell Signaling CST-2056),  
463 rabbit anti-PSD95 (1:1000, Abcam ab18258), rabbit anti-Recoverin (1:1000, Millipore AB5585), rabbit  
464 anti-YTHDF2 (1:1000, Proteintech 24744-1-AP), rabbit anti-YTHDF1 (1:1000, Proteintech 17479-1-AP),  
465 rabbit anti-YTHDF3 (1:1000, Abcam ab103328), rabbit anti-Ubr4 (1:300, Abcam ab86738), sheep anti-  
466 Chx10 (1:1000, Exalpha X1179P). After three times of PBS washing, sections were incubated in PBST  
467 for 1 hr at RT with secondary antibodies: Alexa 488 donkey anti-chicken (1:500, Jackson 703-545-155),  
468 Alexa 488 donkey anti guinea pig (1:500, Jackson 706-545-148), Alexa 488 donkey anti-mouse (1:500,  
469 Thermo A21202), Alexa 488 donkey anti-rabbit (1:500, Thermo A21206), Alexa 555 donkey anti-goat  
470 (1:1000, Thermo A21432), Alexa 555 donkey anti-mouse (1:1000, Thermo A31570), Alexa 555 donkey  
471 anti-rabbit (1:1000, Thermo A31572), Alexa 555 donkey anti-sheep (1:1000, Thermo A21436), Alexa  
472 555 goat anti-chicken (1:1000, Thermo A21437), or Alexa 647 donkey anti-mouse (1:200, Thermo

473 A31571) and then mounted with the VECTASHIELD Antifade Mounting Medium with DAPI (Vector  
474 Laboratory).

475 For cultured neurons, after twice of PBS washing, cells were fixed for 15 min with 4% PFA in 0.1  
476 M PB at RT, then washed with PBS three times and blocked in PBST for 20 min at RT. Antibody  
477 incubation conditions are the same as tissue sections.

478 For wholemount immunostaining of retina, eyes were dissected after myocardial perfusion with  
479 0.9% NaCl. Then retinas were separated from sclera and fixed with 4% PFA in 0.1M PB for 1 hr at RT.  
480 Then retinas were blocked with 5% normal goat serum (Novus), 0.4% Triton x-100 in PBS overnight at  
481 4°C. Primary antibodies such as chicken anti-GFP (1:1000, Abcam ab13970), mouse anti-Brn3a (1:300,  
482 Millipore MAB1585), mouse anti-SMI-32 (1:200, BioLegend 801701), or rabbit anti-Melanopsin  
483 (1:1000, Thermo PA1-780), rabbit anti-CART (1:2000, Phoenix Pharmaceuticals H-003-62) were  
484 diluted in 5% normal goat serum, 0.4% Triton x-100 in PBS and incubated overnight at 4°C. Then  
485 retinas were incubated with Alexa 488 donkey anti-chicken (1:500, Jackson 703-545-155), Alexa 488  
486 donkey anti-mouse (1:500, Thermo A21202), Alexa 555 donkey anti-mouse (1:1000, Thermo A-31570)  
487 and Alexa 555 donkey anti-rabbit (1:1000, Thermo A31572) second antibodies in 5% normal goat  
488 serum (Novus), 0.4% Triton x-100 in PBS and finally mounted with the VECTASHIELD Antifade  
489 Mounting Medium with DAPI.

490 All images were captured on Nikon A1R confocal microscope or Zeiss LSM 800 confocal  
491 microscope with identical settings for each group in the same experiment. A region of interest (ROI),  
492 length or thickness in immunofluorescence experiments were obtained with ImageJ. The number of  
493 neurons in specific area was counted blindly and manually. To quantify RGC dendrite lamination in  
494 IPL with Thy1-GFP, z-stack and maximum projection were performed during the analysis. GFP  
495 intensity values across IPL depth were measured by ImageJ/Analyze/Plot Profile function (*Liu et al.*  
496 **2018**). To quantify the numbers of Bassoon<sup>+</sup>/PSD-95<sup>+</sup> excitatory synapses in IPL, the colocalization  
497 puncta was measured by ImageJ/Analyze/Puncta Analyzer as described previously (*Ippolito and*  
498 *Eroglu 2010*).



499

#### 500 **Sholl analysis**

501 For confocal images of cultured RGCs, MAP2 signals in original format were analyzed with simple  
502 neurite tracer and then quantified with Sholl analysis (5  $\mu\text{m}$  per distance from soma center) which  
503 was a widely used method in neurobiology to quantify the complexity of dendritic arbors using  
504 ImageJ (*Schindelin et al. 2012; Binley et al. 2014*). Retina wholemount data were captured in z-stack  
505 mode (0.5-1  $\mu\text{m}$  per slide) with confocal microscopes. ZsGreen, eGFP and SMI-32 signals were  
506 directly analyzed with simple neurite tracer and then z projection of all tracers was quantified with  
507 Sholl analysis (10  $\mu\text{m}$  per distance from soma center), while melanopsin signals were maximum-  
508 projected before tracing.

509

#### 510 **Optomotor response assay.**

511 *Ythdf2* cKO and control mice aged about 6 weeks were dark-adapted overnight before experiment  
512 and used in the optomotor response assay following the previously reported protocols (*Douglas et al.*  
513 *2005; Sergeeva et al. 2018*). Using the Matlab program, 0.2 cycle/degree (15 sec per direction of  
514 rotation) was first used for mice to adapt this experiment, and 0.3, 0.35, 0.4, 0.43, 0.45, 0.47, 0.5 and  
515 0.55 c/deg (30 sec per direction of rotation) were used in the following recordings. Mouse behaviors  
516 were analyzed in real time during the experiment and re-checked with video recordings. Finally, data  
517 for each mouse were determined by the minimal spatial frequency between left and right optomotor  
518 response.

519

#### 520 **CTB Labelling of Optic Nerve**

521 To label RGC axon terminals in mouse brain, RGC axons were anterogradely labeled by CTB (Cholera  
522 Toxin Subunit B) conjugated with Alexa Fluor™ 555 (Invitrogen, C34776) through intravitreal injection  
523 48 hr before sacrifice. After PFA perfusion, the brains were fixed with 4% PFA in 0.1 M PB overnight,  
524 dehydrated with 15% sucrose and 30% sucrose in 0.1 M PB overnight at 4°C sequentially, embedded

525 with O.C.T. for coronal section, and cryosectioned at 12  $\mu\text{m}$  with Leica CM1950 Cryostat. After PBS  
526 washing, the sections were mounted with VECTASHIELD Antifade Mounting Medium with DAPI  
527 (Vector Laboratory). The images were captured on Tissue Genostics with identical settings for each  
528 group in the same experiment with the TissueFAXS 7.0 software.

529

### 530 **RNA immunoprecipitation and sequencing (RIP-Seq)**

531 For RNA Immunoprecipitation (RIP) experiment, we used the EZ-Magna RIP<sup>TM</sup> RNA-Binding Protein  
532 Immunoprecipitation Kit (Millipore) following the manual with minor modifications. Briefly,  $1 \times 10^7$   
533 retina neurons were subjected to each 100  $\mu\text{l}$  lysis buffer. The amount of YTHDF2 antibody  
534 (Proteintech, 24744-1-AP) and control IgG used for immunoprecipitation is 5  $\mu\text{g}$ , respectively.  
535 Incubation was done overnight at 4  $^{\circ}\text{C}$ . After quality control monitoring using Agilent 2100, 100 ng  
536 RNA of input and elutes after RIP were used to generate the library using the TruSeq Stranded RNA  
537 Sample Preparation Kit (Illumina) and sequenced on the Illumina HiSeq 3000 platform (Jingneng,  
538 Shanghai, China). The filtered reads were mapped to the mouse reference genome (GRCm38) using  
539 STAR v2.5 (*Dobin et al. 2013*) with default parameters. The resulting bam files were fed to HTSeq  
540 tool (*Anders et al. 2015*) to count the number of RNA-seq reads, which was further normalized to  
541 calculate FPKM. To determine which gene is enriched, we computed the FPKM from RIP elute to  
542 input and any fold change greater than 2 ( $p$  value less than 0.05) was considered enriched. All  
543 enriched genes were used to do the Gene Ontology (GO) analyses. GO enrichment analysis was  
544 implemented by the GOseq R package, in which gene length bias was corrected. GO terms with  
545 corrected  $p$  value less than 0.05 were considered significantly enriched.

546

### 547 **MS analysis**

548 E15.5 retinal neurons were cultured and infected with lenti viral *shYthdf2* or *shCtrl*. After puromycin  
549 (Sigma) selection, cells were washed with ice-cold PBS and then lysed with freshly prepared lysis  
550 buffer composed of 8 M urea (Sigma), 0.1 M HEPES (pH 7.4, Invitrogen), and protease inhibitors

551 (Roche). The cell lysates were then ultrasonicated on ice and centrifuged at  $10,000 \times g$  for 10 min at  
552  $4^\circ\text{C}$  to discard the cell debris. Protein concentration was measured using the BCA Protein Assay Kit  
553 (Thermo Scientific). 100  $\mu\text{g}$  of total protein for each group were reduced with 5 mM dithiothreitol  
554 (Sigma) for 30 min at  $56^\circ\text{C}$  and then alkylated with 11 mM iodoacetamide (Sigma) for 15 min at RT in  
555 dark. After using 100 mM TEAB (Sigma) to dilute the urea concentration to less than 2 M in each  
556 sample, trypsin (Promega) was then added to digest the proteins overnight at  $37^\circ\text{C}$ . Peptides were  
557 further desalted by Strata X C18 SPE column (Phenomenex) and labelled with TMT10plex Mass Tag  
558 Labelling kit (Thermo Scientific) according to the manufacturer's instructions. Finally, the labeled  
559 peptides were subjected to HPLC fractionation and LC-MS/MS analysis. Proteins with fold changes  
560 greater than 1.3 and p values less than 0.05 were considered to be regulated by YTHDF2 KD with  
561 statistical significance.

562

### 563 **Anti-m<sup>6</sup>A Immunoprecipitation**

564 Total retinal RNA was extracted from P0 WT mouse pups. Immunoprecipitation of m<sup>6</sup>A-modified  
565 transcripts was carried out with Magna MeRIP™ m<sup>6</sup>A Kit (Merck-Millipore, 17-10499) following the  
566 manual. m<sup>6</sup>A antibody (Synaptic Systems, 202003) and corresponding control IgG were used in this  
567 experiment. The RNA samples pulled down from the experiment were used for RT-qPCR.

568

### 569 **Acute ocular hypertension (AOH) model**

570 Mice were anesthetized with 5% chloral hydrate in normal saline (10  $\mu\text{l/g}$ ) based on body weight and  
571 the Compound Tropicamide Eye Drops were used to scatter pupil. The anterior chamber was  
572 penetrated using the 32G  $\times$  1/2'' needles (TSK) and filled with the BBS Sterile Irrigating Solution  
573 (Alcon) which was hung at a high position to provide proper pressure. Intraocular pressure was  
574 measured with the Tonolab tonometer (icare) for every 10 min and maintained at 85-90 mmHg for 1  
575 hr. Levofloxacin hydrochloride was used after the operation and mice were revived in a  $37^\circ\text{C}$   
576 environment. Retinas were analyzed for gene expression of YTHDF2 1 day after AOH, gene

577 expression of *Hspa12a* and *Islr2* 3 days after AOH, dendritic complexity and RGC number 3-7 days  
578 after AOH.

579

### 580 **Statistical analysis**

581 All experiments were conducted at a minimum of three independent biological replicates (two  
582 biological replicates for the RIP assay) or three mice/pups for each genotype/condition in the lab.  
583 Data are mean  $\pm$  SEM. Statistical analysis was performed using GraphPad Prism 7.0. When comparing  
584 the means of two groups, an unpaired or paired *t* test was performed on the basis of experimental  
585 design. The settings for all box and whisker plots are: 25th-75th percentiles (boxes), minimum and  
586 maximum (whiskers), and medians (horizontal lines). A *p* value less than 0.05 was considered as  
587 statistically significant: \**p* < 0.05, \*\**p* < 0.01, \*\*\**p* < 0.001, \*\*\*\**p* < 0.0001.

588

### 589 **Acknowledgements**

590 We thank Ke Wang and Kwok-Fai So (Jinan University) for help on the optomotor response assay. We  
591 thank Mengqing Xiang and Suo Qiu (Zhongshan Ophthalmic Center, Sun Yat-sen University) for help  
592 on AAV experiments. We thank other members of Ji laboratory for technical support, helpful  
593 discussions and comments on the manuscript. This work was supported by National Natural Science  
594 Foundation of China (31871038 and 32170955 to S.-J.J.; 31922027 and 32170958 to B.P.), Shenzhen-  
595 Hong Kong Institute of Brain Science-Shenzhen Fundamental Research Institutions (2021SHIBS0002,  
596 2019SHIBS0002), High-Level University Construction Fund for Department of Biology (internal grant  
597 no. G02226301), Science and Technology Innovation Commission of Shenzhen Municipal  
598 Government (ZDSYS20200811144002008), Program of Shanghai Subject Chief Scientist  
599 (21XD1420400), and the Innovative Research Team of High-Level Local University in Shanghai (B.P.).

600

### 601 **Author contributions**

602 S.-J.J., F.N. and B.P. formulated the idea and designed the experiments; F.N. performed and analyzed  
603 most of the experiments; P.H., J.Z. and Y.S. carried out plasmid construction, AAV injection and  
604 imaging; L.Y. performed the RIP-seq experiment; J.Y. performed the MS experiment; M.Z., Y.S., B.Y.  
605 and C.L. provided technical help and helped with data analysis; F.N. and K.T. performed the AOH  
606 experiments under the supervision of B.P.; the optomotor code was written by B.P.; S.-J.J., F.N., L.Y.,  
607 and J.Y. wrote the manuscript with inputs from other authors.

608

### 609 **Ethics**

610 All experiments using mice were carried out following the animal protocols approved by the  
611 Laboratory Animal Welfare and Ethics Committee of Southern University of Science and Technology  
612 (approval numbers: SUSTC-JY2017004, SUSTC-JY2019081).

613

### 614 **Competing interests**

615 The authors have declared that no competing interests exist.

616

### 617 **Data availability statement**

618 The RIP-seq data have been deposited to the Gene Expression Omnibus (GEO) with accession  
619 number GSE145390. The mass spectrometry proteomics data have been deposited to the  
620 ProteomeXchange Consortium via the PRIDE partner repository with the dataset  
621 identifier PXD017775.

622

### 623 **References**

624 Agostinone J, Di Polo A. 2015. Retinal ganglion cell dendrite pathology and synapse loss: Implications  
625 for glaucoma. *Prog Brain Res* **220**:199-216. DOI: <https://doi.org/10.1016/bs.pbr.2015.04.012>,  
626 PMID: [26497792](#)  
627 Agudo M, Perez-Marin MC, Lonngren U, Sobrado P, Conesa A, Canovas I, Salinas-Navarro M, Miralles-  
628 Imperial J, Hallbook F, Vidal-Sanz M. 2008. Time course profiling of the retinal transcriptome after  
629 optic nerve transection and optic nerve crush. *Mol Vis* **14**:1050-1063. PMID: [18552980](#)

- 630 Anders S, Pyl PT, Huber W. 2015. HTSeq--a Python framework to work with high-throughput  
631 sequencing data. *Bioinformatics* **31**:166-169. DOI: <https://doi.org/10.1093/bioinformatics/btu638>,  
632 PMID: 25260700
- 633 Baden T, Berens P, Franke K, Roman Roson M, Bethge M, Euler T. 2016. The functional diversity of  
634 retinal ganglion cells in the mouse. *Nature* **529**:345-350. DOI:  
635 <https://doi.org/10.1038/nature16468>, PMID: 26735013
- 636 Benoist M, Gaillard S, Castets F. 2006. The striatin family: a new signaling platform in dendritic spines.  
637 *J Physiol Paris* **99**:146-153. DOI: <https://doi.org/10.1016/j.jphysparis.2005.12.006>, PMID:  
638 16460920
- 639 Binley KE, Ng WS, Tribble JR, Song B, Morgan JE. 2014. Sholl analysis: a quantitative comparison of  
640 semi-automated methods. *J Neurosci Methods* **225**:65-70. DOI:  
641 <https://doi.org/10.1016/j.jneumeth.2014.01.017>, PMID: 24485871
- 642 Brechbiel JL, Gavis ER. 2008. Spatial regulation of nanos is required for its function in dendrite  
643 morphogenesis. *Curr Biol* **18**:745-750. DOI: <https://doi.org/10.1016/j.cub.2008.04.033>, PMID:  
644 18472422
- 645 Breitman M, Zilberberg A, Caspi M, Rosin-Arbesfeld R. 2008. The armadillo repeat domain of the APC  
646 tumor suppressor protein interacts with Striatin family members. *Biochim Biophys Acta*  
647 **1783**:1792-1802. DOI: <https://doi.org/10.1016/j.bbamcr.2008.04.017>, PMID: 18502210
- 648 Cahill ME, Xie Z, Day M, Photowala H, Barbolina MV, Miller CA, Weiss C, Radulovic J, Sweatt JD,  
649 Disterhoft JF, Surmeier DJ, Penzes P. 2009. Kalirin regulates cortical spine morphogenesis and  
650 disease-related behavioral phenotypes. *Proc Natl Acad Sci U S A* **106**:13058-13063. DOI:  
651 <https://doi.org/10.1073/pnas.0904636106>, PMID: 19625617
- 652 Cherry TJ, Wang S, Bormuth I, Schwab M, Olson J, Cepko CL. 2011. NeuroD factors regulate cell fate  
653 and neurite stratification in the developing retina. *J Neurosci* **31**:7365-7379. DOI:  
654 <https://doi.org/10.1523/jneurosci.2555-10.2011>, PMID: 21593321
- 655 Cheung ZH, Chin WH, Chen Y, Ng YP, Ip NY. 2007. Cdk5 is involved in BDNF-stimulated dendritic  
656 growth in hippocampal neurons. *PLoS Biol* **5**:e63. DOI:  
657 <https://doi.org/10.1371/journal.pbio.0050063>, PMID: 17341134
- 658 Chihara T, Luginbuhl D, Luo L. 2007. Cytoplasmic and mitochondrial protein translation in axonal and  
659 dendritic terminal arborization. *Nat Neurosci* **10**:828-837. DOI: <https://doi.org/10.1038/nn1910>,  
660 PMID: 17529987
- 661 Cubelos B, Briz CG, Esteban-Ortega GM, Nieto M. 2015. Cux1 and Cux2 selectively target basal and  
662 apical dendritic compartments of layer II-III cortical neurons. *Dev Neurobiol* **75**:163-172. DOI:  
663 <https://doi.org/10.1002/dneu.22215>, PMID: 25059644
- 664 Dobin A, Davis CA, Schlesinger F, Drenkow J, Zaleski C, Jha S, Batut P, Chaisson M, Gingeras TR. 2013.  
665 STAR: ultrafast universal RNA-seq aligner. *Bioinformatics* **29**:15-21. DOI:  
666 <https://doi.org/10.1093/bioinformatics/bts635>, PMID: 23104886
- 667 Dominissini D, Moshitch-Moshkovitz S, Schwartz S, Salmon-Divon M, Ungar L, Osenberg S, Cesarkas K,  
668 Jacob-Hirsch J, Amariglio N, Kupiec M, Sorek R, Rechavi G. 2012. Topology of the human and  
669 mouse m6A RNA methylomes revealed by m6A-seq. *Nature* **485**:201-206. DOI:  
670 <https://doi.org/10.1038/nature11112>, PMID: 22575960
- 671 Dong X, Shen K, Bulow HE. 2015. Intrinsic and extrinsic mechanisms of dendritic morphogenesis.  
672 *Annu Rev Physiol* **77**:271-300. DOI: <https://doi.org/10.1146/annurev-physiol-021014-071746>,  
673 PMID: 25386991
- 674 Douglas RM, Alam NM, Silver BD, McGill TJ, Tschetter WW, Prusky GT. 2005. Independent visual  
675 threshold measurements in the two eyes of freely moving rats and mice using a virtual-reality  
676 optokinetic system. *Vis Neurosci* **22**:677-684. DOI: <https://doi.org/10.1017/s0952523805225166>,  
677 PMID: 16332278
- 678 Feng G, Mellor RH, Bernstein M, Keller-Peck C, Nguyen QT, Wallace M, Nerbonne JM, Lichtman JW,  
679 Sanes JR. 2000. Imaging neuronal subsets in transgenic mice expressing multiple spectral variants  
680 of GFP. *Neuron* **28**:41-51. PMID: 11086982

- 681 Furuta Y, Lagutin O, Hogan BL, Oliver GC. 2000. Retina- and ventral forebrain-specific Cre  
682 recombinase activity in transgenic mice. *Genesis* **26**:130-132. PMID: [10686607](https://pubmed.ncbi.nlm.nih.gov/10686607/)
- 683 Hattar S, Liao HW, Takao M, Berson DM, Yau KW. 2002. Melanopsin-containing retinal ganglion cells:  
684 architecture, projections, and intrinsic photosensitivity. *Science* **295**:1065-1070. DOI:  
685 <https://doi.org/10.1126/science.1069609>, PMID: [11834834](https://pubmed.ncbi.nlm.nih.gov/11834834/)
- 686 Herring BE, Nicoll RA. 2016. Kalirin and Trio proteins serve critical roles in excitatory synaptic  
687 transmission and LTP. *Proc Natl Acad Sci U S A* **113**:2264-2269. DOI:  
688 <https://doi.org/10.1073/pnas.1600179113>, PMID: [26858404](https://pubmed.ncbi.nlm.nih.gov/26858404/)
- 689 Ippolito DM, Eroglu C. 2010. Quantifying synapses: an immunocytochemistry-based assay to quantify  
690 synapse number. *J Vis Exp*. DOI: <https://doi.org/10.3791/2270>, PMID: [21113117](https://pubmed.ncbi.nlm.nih.gov/21113117/)
- 691 Jakobs TC. 2014. Differential gene expression in glaucoma. *Cold Spring Harb Perspect Med* **4**:a020636.  
692 DOI: <https://doi.org/10.1101/cshperspect.a020636>, PMID: [24985133](https://pubmed.ncbi.nlm.nih.gov/24985133/)
- 693 Jan YN, Jan LY. 2010. Branching out: mechanisms of dendritic arborization. *Nat Rev Neurosci* **11**:316-  
694 328. DOI: <https://doi.org/10.1038/nrn2836>, PMID: [20404840](https://pubmed.ncbi.nlm.nih.gov/20404840/)
- 695 Kay JN, De la Huerta I, Kim IJ, Zhang Y, Yamagata M, Chu MW, Meister M, Sanes JR. 2011. Retinal  
696 ganglion cells with distinct directional preferences differ in molecular identity, structure, and  
697 central projections. *J Neurosci* **31**:7753-7762. DOI: [https://doi.org/10.1523/jneurosci.0907-  
698 11.2011](https://doi.org/10.1523/jneurosci.0907-11.2011), PMID: [21613488](https://pubmed.ncbi.nlm.nih.gov/21613488/)
- 699 Kay JN, Voinescu PE, Chu MW, Sanes JR. 2011. Neurod6 expression defines new retinal amacrine cell  
700 subtypes and regulates their fate. *Nat Neurosci* **14**:965-972. DOI: <https://doi.org/10.1038/nn.2859>,  
701 PMID: [21743471](https://pubmed.ncbi.nlm.nih.gov/21743471/)
- 702 Kechad A, Jolicoeur C, Tufford A, Mattar P, Chow RWY, Harris WA, Cayouette M. 2012. Numb is  
703 required for the production of terminal asymmetric cell divisions in the developing mouse retina. *J*  
704 *Neurosci* **32**:17197-17210. DOI: <https://doi.org/10.1523/jneurosci.4127-12.2012>, PMID: [23197712](https://pubmed.ncbi.nlm.nih.gov/23197712/)
- 705 Krishnaswamy A, Yamagata M, Duan X, Hong YK, Sanes JR. 2015. Sidekick 2 directs formation of a  
706 retinal circuit that detects differential motion. *Nature* **524**:466-470. DOI:  
707 <https://doi.org/10.1038/nature14682>, PMID: [26287463](https://pubmed.ncbi.nlm.nih.gov/26287463/)
- 708 Lanoue V, Langford M, White A, Sempert K, Fogg L, Cooper HM. 2017. The Wnt receptor Ryk is a  
709 negative regulator of mammalian dendrite morphogenesis. *Sci Rep* **7**:5965. DOI:  
710 <https://doi.org/10.1038/s41598-017-06140-z>, PMID: [28729735](https://pubmed.ncbi.nlm.nih.gov/28729735/)
- 711 Ledda F, Paratcha G. 2017. Mechanisms regulating dendritic arbor patterning. *Cell Mol Life Sci*  
712 **74**:4511-4537. DOI: <https://doi.org/10.1007/s00018-017-2588-8>, PMID: [28735442](https://pubmed.ncbi.nlm.nih.gov/28735442/)
- 713 Lefebvre JL, Kostadinov D, Chen WV, Maniatis T, Sanes JR. 2012. Protocadherins mediate dendritic  
714 self-avoidance in the mammalian nervous system. *Nature* **488**:517-521. DOI:  
715 <https://doi.org/10.1038/nature11305>, PMID: [22842903](https://pubmed.ncbi.nlm.nih.gov/22842903/)
- 716 Lefebvre JL, Sanes JR, Kay JN. 2015. Development of dendritic form and function. *Annu Rev Cell Dev*  
717 *Biol* **31**:741-777. DOI: <https://doi.org/10.1146/annurev-cellbio-100913-013020>, PMID: [26422333](https://pubmed.ncbi.nlm.nih.gov/26422333/)
- 718 Li D, Musante V, Zhou W, Picciotto MR, Nairn AC. 2018. Striatin-1 is a B subunit of protein  
719 phosphatase PP2A that regulates dendritic arborization and spine development in striatal neurons.  
720 *J Biol Chem* **293**:11179-11194. DOI: <https://doi.org/10.1074/jbc.RA117.001519>, PMID: [29802198](https://pubmed.ncbi.nlm.nih.gov/29802198/)
- 721 Lin B, Wang SW, Masland RH. 2004. Retinal ganglion cell type, size, and spacing can be specified  
722 independent of homotypic dendritic contacts. *Neuron* **43**:475-485. DOI:  
723 <https://doi.org/10.1016/j.neuron.2004.08.002>, PMID: [15312647](https://pubmed.ncbi.nlm.nih.gov/15312647/)
- 724 Lin L, Lo LH, Lyu Q, Lai KO. 2017. Determination of dendritic spine morphology by the striatin scaffold  
725 protein STRN4 through interaction with the phosphatase PP2A. *J Biol Chem* **292**:9451-9464. DOI:  
726 <https://doi.org/10.1074/jbc.M116.772442>, PMID: [28442576](https://pubmed.ncbi.nlm.nih.gov/28442576/)
- 727 Liu J, Reggiani JDS, Laboulaye MA, Pandey S, Chen B, Rubenstein JLR, Krishnaswamy A, Sanes JR. 2018.  
728 Tbr1 instructs laminar patterning of retinal ganglion cell dendrites. *Nat Neurosci* **21**:659-670. DOI:  
729 <https://doi.org/10.1038/s41593-018-0127-z>, PMID: [29632360](https://pubmed.ncbi.nlm.nih.gov/29632360/)
- 730 Liu J, Sanes JR. 2017. Cellular and Molecular Analysis of Dendritic Morphogenesis in a Retinal Cell  
731 Type That Senses Color Contrast and Ventral Motion. *J Neurosci* **37**:12247-12262. DOI:  
732 <https://doi.org/10.1523/jneurosci.2098-17.2017>, PMID: [29114073](https://pubmed.ncbi.nlm.nih.gov/29114073/)

- 733 Livneh I, Moshitch-Moshkovitz S, Amariglio N, Rechavi G, Dominissini D. 2020. The m(6)A  
734 epitranscriptome: transcriptome plasticity in brain development and function. *Nat Rev Neurosci*  
735 **21**:36-51. DOI: <https://doi.org/10.1038/s41583-019-0244-z>, PMID: 31804615
- 736 Lu J, Luo C, Bali KK, Xie RG, Mains RE, Eipper BA, Kuner R. 2015. A role for Kalirin-7 in nociceptive  
737 sensitization via activity-dependent modulation of spinal synapses. *Nat Commun* **6**:6820. DOI:  
738 <https://doi.org/10.1038/ncomms7820>, PMID: 25865668
- 739 Mains RE, Kiraly DD, Eipper-Mains JE, Ma XM, Eipper BA. 2011. Kalrn promoter usage and isoform  
740 expression respond to chronic cocaine exposure. *BMC neuroscience* **12**:20. DOI:  
741 <https://doi.org/10.1186/1471-2202-12-20>, PMID: 21329509
- 742 Mao Y, Kong Q, Li R, Zhang X, Gui Y, Li Y, Li C, Zhao Y, Liu L, Ding Z. 2018. Heat shock protein A12A  
743 encodes a novel prosurvival pathway during ischaemic stroke. *Biochim Biophys Acta Mol Basis Dis*  
744 **1864**:1862-1872. DOI: <https://doi.org/10.1016/j.bbadis.2018.03.006>, PMID: 29530582
- 745 Meyer KD, Saletore Y, Zumbo P, Elemento O, Mason CE, Jaffrey SR. 2012. Comprehensive analysis of  
746 mRNA methylation reveals enrichment in 3' UTRs and near stop codons. *Cell* **149**:1635-1646. DOI:  
747 <https://doi.org/10.1016/j.cell.2012.05.003>, PMID: 22608085
- 748 Min X, Zhang X, Li Y, Cao X, Cheng H, Li Y, Li C, Kong Q, Mao Q, Peng P, Ni Y, Li J, Duan Y, Liu L, Ding Z.  
749 2020. HSPA12A unstabilizes CD147 to inhibit lactate export and migration in human renal cell  
750 carcinoma. *Theranostics* **10**:8573-8590. DOI: <https://doi.org/10.7150/thno.44321>, PMID:  
751 [32754264](https://doi.org/10.7150/thno.44321)
- 752 Morgan JE, Datta AV, Erichsen JT, Albon J, Boulton ME. 2006. Retinal ganglion cell remodelling in  
753 experimental glaucoma. *Adv Exp Med Biol* **572**:397-402. DOI: [https://doi.org/10.1007/0-387-](https://doi.org/10.1007/0-387-32442-9_56)  
754 [32442-9\\_56](https://doi.org/10.1007/0-387-32442-9_56), PMID: 17249602
- 755 Nachtergaele S, He C. 2018. Chemical Modifications in the Life of an mRNA Transcript. *Annu Rev*  
756 *Genet* **52**:349-372. DOI: <https://doi.org/10.1146/annurev-genet-120417-031522>, PMID: 30230927
- 757 Parsons K, Nakatani Y, Nguyen MD. 2015. p600/UBR4 in the central nervous system. *Cell Mol Life Sci*  
758 **72**:1149-1160. DOI: <https://doi.org/10.1007/s00018-014-1788-8>, PMID: 25424645
- 759 Penzes P, Johnson RC, Sattler R, Zhang X, Hugarir RL, Kambampati V, Mains RE, Eipper BA. 2001. The  
760 neuronal Rho-GEF Kalirin-7 interacts with PDZ domain-containing proteins and regulates dendritic  
761 morphogenesis. *Neuron* **29**:229-242. DOI: [https://doi.org/10.1016/s0896-6273\(01\)00193-3](https://doi.org/10.1016/s0896-6273(01)00193-3), PMID:  
762 [11182094](https://doi.org/10.1016/s0896-6273(01)00193-3)
- 763 Pongrac JL, Middleton FA, Peng L, Lewis DA, Levitt P, Mirnics K. 2004. Heat shock protein 12A shows  
764 reduced expression in the prefrontal cortex of subjects with schizophrenia. *Biol Psychiatry* **56**:943-  
765 950. DOI: <https://doi.org/10.1016/j.biopsych.2004.09.005>, PMID: 15601604
- 766 Prigge CL, Kay JN. 2018. Dendrite morphogenesis from birth to adulthood. *Curr Opin Neurobiol*  
767 **53**:139-145. DOI: <https://doi.org/10.1016/j.conb.2018.07.007>, PMID: 30092409
- 768 Prusky GT, Alam NM, Beekman S, Douglas RM. 2004. Rapid quantification of adult and developing  
769 mouse spatial vision using a virtual optomotor system. *Invest Ophthalmol Vis Sci* **45**:4611-4616.  
770 DOI: <https://doi.org/10.1167/iovs.04-0541>, PMID: 15557474
- 771 Ramos B, Gaudilliere B, Bonni A, Gill G. 2007. Transcription factor Sp4 regulates dendritic patterning  
772 during cerebellar maturation. *Proc Natl Acad Sci U S A* **104**:9882-9887. DOI:  
773 <https://doi.org/10.1073/pnas.0701946104>, PMID: 17535924
- 774 Riccomagno MM, Sun LO, Brady CM, Alexandropoulos K, Seo S, Kurokawa M, Kolodkin AL. 2014. Cas  
775 adaptor proteins organize the retinal ganglion cell layer downstream of integrin signaling. *Neuron*  
776 **81**:779-786. DOI: <https://doi.org/10.1016/j.neuron.2014.01.036>, PMID: 24559672
- 777 Rosso SB, Sussman D, Wynshaw-Boris A, Salinas PC. 2005. Wnt signaling through Dishevelled, Rac  
778 and JNK regulates dendritic development. *Nat Neurosci* **8**:34-42. DOI:  
779 <https://doi.org/10.1038/nn1374>, PMID: 15608632
- 780 Russell TA, Blizinsky KD, Cobia DJ, Cahill ME, Xie Z, Sweet RA, Duan J, Gejman PV, Wang L, Csernansky  
781 JG, Penzes P. 2014. A sequence variant in human KALRN impairs protein function and coincides  
782 with reduced cortical thickness. *Nat Commun* **5**:4858. DOI: <https://doi.org/10.1038/ncomms5858>,  
783 PMID: 25224588



- 784 Sanes JR, Masland RH. 2015. The types of retinal ganglion cells: current status and implications for  
785 neuronal classification. *Annu Rev Neurosci* **38**:221-246. DOI: [https://doi.org/10.1146/annurev-  
786 neuro-071714-034120](https://doi.org/10.1146/annurev-<br/>786 neuro-071714-034120), PMID: 25897874
- 787 Sapkota D, Chintala H, Wu F, Fliesler SJ, Hu Z, Mu X. 2014. Onecut1 and Onecut2 redundantly  
788 regulate early retinal cell fates during development. *Proc Natl Acad Sci U S A* **111**:E4086-4095. DOI:  
789 <https://doi.org/10.1073/pnas.1405354111>, PMID: 25228773
- 790 Schindelin J, Arganda-Carreras I, Frise E, Kaynig V, Longair M, Pietzsch T, Preibisch S, Rueden C,  
791 Saalfeld S, Schmid B, Tinevez JY, White DJ, Hartenstein V, Eliceiri K, Tomancak P, Cardona A. 2012.  
792 Fiji: an open-source platform for biological-image analysis. *Nat Methods* **9**:676-682. DOI:  
793 <https://doi.org/10.1038/nmeth.2019>, PMID: 22743772
- 794 Sergeeva EG, Espinosa-Garcia C, Atif F, Pardue MT, Stein DG. 2018. Neurosteroid allopregnanolone  
795 reduces ipsilateral visual cortex potentiation following unilateral optic nerve injury. *Exp Neurol*  
796 **306**:138-148. DOI: <https://doi.org/10.1016/j.expneurol.2018.05.005>, PMID: 29729249
- 797 Shi C, Yuan X, Chang K, Cho KS, Xie XS, Chen DF, Luo G. 2018. Optimization of Optomotor Response-  
798 based Visual Function Assessment in Mice. *Sci Rep* **8**:9708. DOI: [https://doi.org/10.1038/s41598-  
799 018-27329-w](https://doi.org/10.1038/s41598-<br/>799 018-27329-w), PMID: 29946119
- 800 Shim SY, Wang J, Asada N, Neumayer G, Tran HC, Ishiguro K, Sanada K, Nakatani Y, Nguyen MD. 2008.  
801 Protein 600 is a microtubule/endoplasmic reticulum-associated protein in CNS neurons. *J Neurosci*  
802 **28**:3604-3614. DOI: <https://doi.org/10.1523/jneurosci.5278-07.2008>, PMID: 18385319
- 803 Shima Y, Kawaguchi SY, Kosaka K, Nakayama M, Hoshino M, Nabeshima Y, Hirano T, Uemura T. 2007.  
804 Opposing roles in neurite growth control by two seven-pass transmembrane cadherins. *Nat*  
805 *Neurosci* **10**:963-969. DOI: <https://doi.org/10.1038/nn1933>, PMID: 17618280
- 806 Shima Y, Kengaku M, Hirano T, Takeichi M, Uemura T. 2004. Regulation of dendritic maintenance and  
807 growth by a mammalian 7-pass transmembrane cadherin. *Dev Cell* **7**:205-216. DOI:  
808 <https://doi.org/10.1016/j.devcel.2004.07.007>, PMID: 15296717
- 809 Shou T, Liu J, Wang W, Zhou Y, Zhao K. 2003. Differential dendritic shrinkage of alpha and beta retinal  
810 ganglion cells in cats with chronic glaucoma. *Invest Ophthalmol Vis Sci* **44**:3005-3010. DOI:  
811 <https://doi.org/10.1167/iovs.02-0620>, PMID: 12824245
- 812 Srinivas S, Watanabe T, Lin CS, William CM, Tanabe Y, Jessell TM, Costantini F. 2001. Cre reporter  
813 strains produced by targeted insertion of EYFP and ECFP into the ROSA26 locus. *BMC Dev Biol* **1**:4.  
814 PMID: 11299042
- 815 Tran NM, Shekhar K, Whitney IE, Jacobi A, Benhar I, Hong G, Yan W, Adiconis X, Arnold ME, Lee JM,  
816 Levin JZ, Lin D, Wang C, Lieber CM, Regev A, He Z, Sanes JR. 2019. Single-Cell Profiles of Retinal  
817 Ganglion Cells Differing in Resilience to Injury Reveal Neuroprotective Genes. *Neuron*. DOI:  
818 <https://doi.org/10.1016/j.neuron.2019.11.006>, PMID: 31784286
- 819 Umino Y, Solessio E, Barlow RB. 2008. Speed, spatial, and temporal tuning of rod and cone vision in  
820 mouse. *J Neurosci* **28**:189-198. DOI: <https://doi.org/10.1523/jneurosci.3551-07.2008>, PMID:  
821 18171936
- 822 Vessey JP, Macchi P, Stein JM, Mikl M, Hawker KN, Vogelsang P, Wieczorek K, Vendra G, Riefler J,  
823 Tubing F, Aparicio SA, Abel T, Kiebler MA. 2008. A loss of function allele for murine Stauf1 leads  
824 to impairment of dendritic Stauf1-RNP delivery and dendritic spine morphogenesis. *Proc Natl*  
825 *Acad Sci U S A* **105**:16374-16379. DOI: <https://doi.org/10.1073/pnas.0804583105>, PMID:  
826 18922781
- 827 Wang X, Lu Z, Gomez A, Hon GC, Yue Y, Han D, Fu Y, Parisien M, Dai Q, Jia G, Ren B, Pan T, He C. 2014.  
828 N6-methyladenosine-dependent regulation of messenger RNA stability. *Nature* **505**:117-120. DOI:  
829 <https://doi.org/10.1038/nature12730>, PMID: 24284625
- 830 Wang Y, Li Y, Yue M, Wang J, Kumar S, Wechsler-Reya RJ, Zhang Z, Ogawa Y, Kellis M, Duyster G, Zhao  
831 JC. 2018. N(6)-methyladenosine RNA modification regulates embryonic neural stem cell self-  
832 renewal through histone modifications. *Nat Neurosci* **21**:195-206. DOI:  
833 <https://doi.org/10.1038/s41593-017-0057-1>, PMID: 29335608
- 834 Weber AJ, Kaufman PL, Hubbard WC. 1998. Morphology of single ganglion cells in the glaucomatous  
835 primate retina. *Invest Ophthalmol Vis Sci* **39**:2304-2320. PMID: 9804139

- 836 Xie Z, Cahill ME, Penzes P. 2010. Kalirin loss results in cortical morphological alterations. *Mol Cell*  
837 *Neurosci* **43**:81-89. DOI: <https://doi.org/10.1016/j.mcn.2009.09.006>, PMID: 19800004
- 838 Xie Z, Srivastava DP, Photowala H, Kai L, Cahill ME, Woolfrey KM, Shum CY, Surmeier DJ, Penzes P.  
839 2007. Kalirin-7 controls activity-dependent structural and functional plasticity of dendritic spines.  
840 *Neuron* **56**:640-656. DOI: <https://doi.org/10.1016/j.neuron.2007.10.005>, PMID: 18031682
- 841 Yan Y, Eipper BA, Mains RE. 2015. Kalirin-9 and Kalirin-12 Play Essential Roles in Dendritic Outgrowth  
842 and Branching. *Cereb Cortex* **25**:3487-3501. DOI: <https://doi.org/10.1093/cercor/bhu182>, PMID:  
843 [25146373](https://doi.org/10.1093/cercor/bhu182)
- 844 Ye B, Petritsch C, Clark IE, Gavis ER, Jan LY, Jan YN. 2004. Nanos and Pumilio are essential for dendrite  
845 morphogenesis in Drosophila peripheral neurons. *Curr Biol* **14**:314-321. DOI:  
846 <https://doi.org/10.1016/j.cub.2004.01.052>, PMID: 14972682
- 847 Yu J, Chen M, Huang H, Zhu J, Song H, Zhu J, Park J, Ji SJ. 2018. Dynamic m6A modification regulates  
848 local translation of mRNA in axons. *Nucleic acids research* **46**:1412-1423. DOI:  
849 <https://doi.org/10.1093/nar/gkx1182>, PMID: 29186567
- 850 Yu J, She Y, Ji SJ. 2021. m(6)A Modification in Mammalian Nervous System Development, Functions,  
851 Disorders, and Injuries. *Front Cell Dev Biol* **9**:679662. DOI:  
852 <https://doi.org/10.3389/fcell.2021.679662>, PMID: 34113622
- 853 Yu J, She Y, Yang L, Zhuang M, Han P, Liu J, Lin X, Wang N, Chen M, Jiang C, Zhang Y, Yuan Y, Ji SJ.  
854 2021. The m(6) A Readers YTHDF1 and YTHDF2 Synergistically Control Cerebellar Parallel Fiber  
855 Growth by Regulating Local Translation of the Key Wnt5a Signaling Components in Axons. *Adv Sci*  
856 *(Weinh)* **8**:e2101329. DOI: <https://doi.org/10.1002/advs.202101329>, PMID: 34643063
- 857 Zhou X, Qyang Y, Kelsoe JR, Masliah E, Geyer MA. 2007. Impaired postnatal development of  
858 hippocampal dentate gyrus in Sp4 null mutant mice. *Genes Brain Behav* **6**:269-276. DOI:  
859 <https://doi.org/10.1111/j.1601-183X.2006.00256.x>, PMID: 16899055

860

861

862 **Figures, figure legends, and supplementary files**

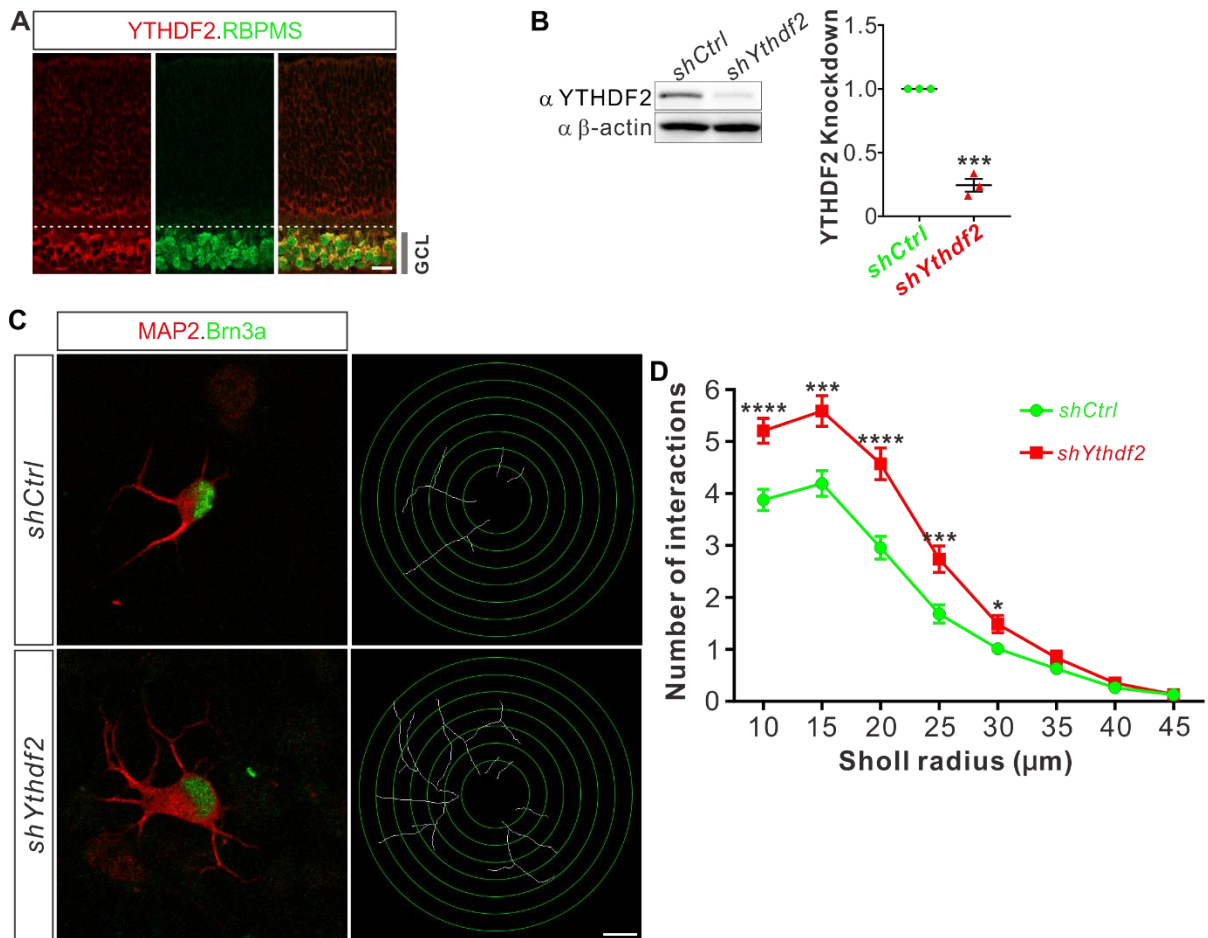

863

864 **Figure 1. Knockdown of YTHDF2 leads to a robust increase of RGC dendrite branching.**

865 **(A)** Representative confocal images showing high expression of YTHDF2 in RGCs (marked by RBPMS)  
866 in P0 retina. Note that all RGCs marked by the pan-RGC marker RBPMS express YTHDF2 while all  
867 YTHDF2-expressing cells are RBPMS<sup>+</sup> RGCs. GCL, ganglion cell layer. Scale bars: 20  $\mu$ m.

868 **(B)** Western blotting (WB) confirming efficient knockdown (KD) of YTHDF2 in cultured RGCs using  
869 *shYthdf2*. Data of WB quantification are mean  $\pm$  SEM and are represented as dot plots: \*\*\**p* =  
870 0.00012 (*n* = 3 replicates); by unpaired Student's *t* test.

871 **(C)** Examination of RGC dendrite development after YTHDF2 KD. As shown, significantly increased  
872 branching of dendrites marked by MAP2 immunofluorescence was observed in cultured RGCs  
873 marked by Brn3a. Dendrite traces were drawn for the corresponding RGCs. Scale bar: 10  $\mu$ m.

874 (D) Quantification of dendrite branching (C) using Sholl analysis. As shown, numbers of interactions  
 875 are significantly greater in *shYthdf2* groups ( $n = 68$  RGCs) than *shCtrl* groups ( $n = 72$  RGCs) in Sholl  
 876 radii between 10-30  $\mu\text{m}$ . Data are mean  $\pm$  SEM. \*\*\*\* $p = 4.32\text{E-}05$  (10  $\mu\text{m}$ ), \*\*\* $p = 0.00038$  (15  $\mu\text{m}$ ),  
 877 \*\*\*\* $p = 2.85\text{E-}05$  (20  $\mu\text{m}$ ), \*\*\* $p = 0.00084$  (25  $\mu\text{m}$ ), \* $p = 0.020$  (30  $\mu\text{m}$ ), by unpaired Student's *t* test.  
 878

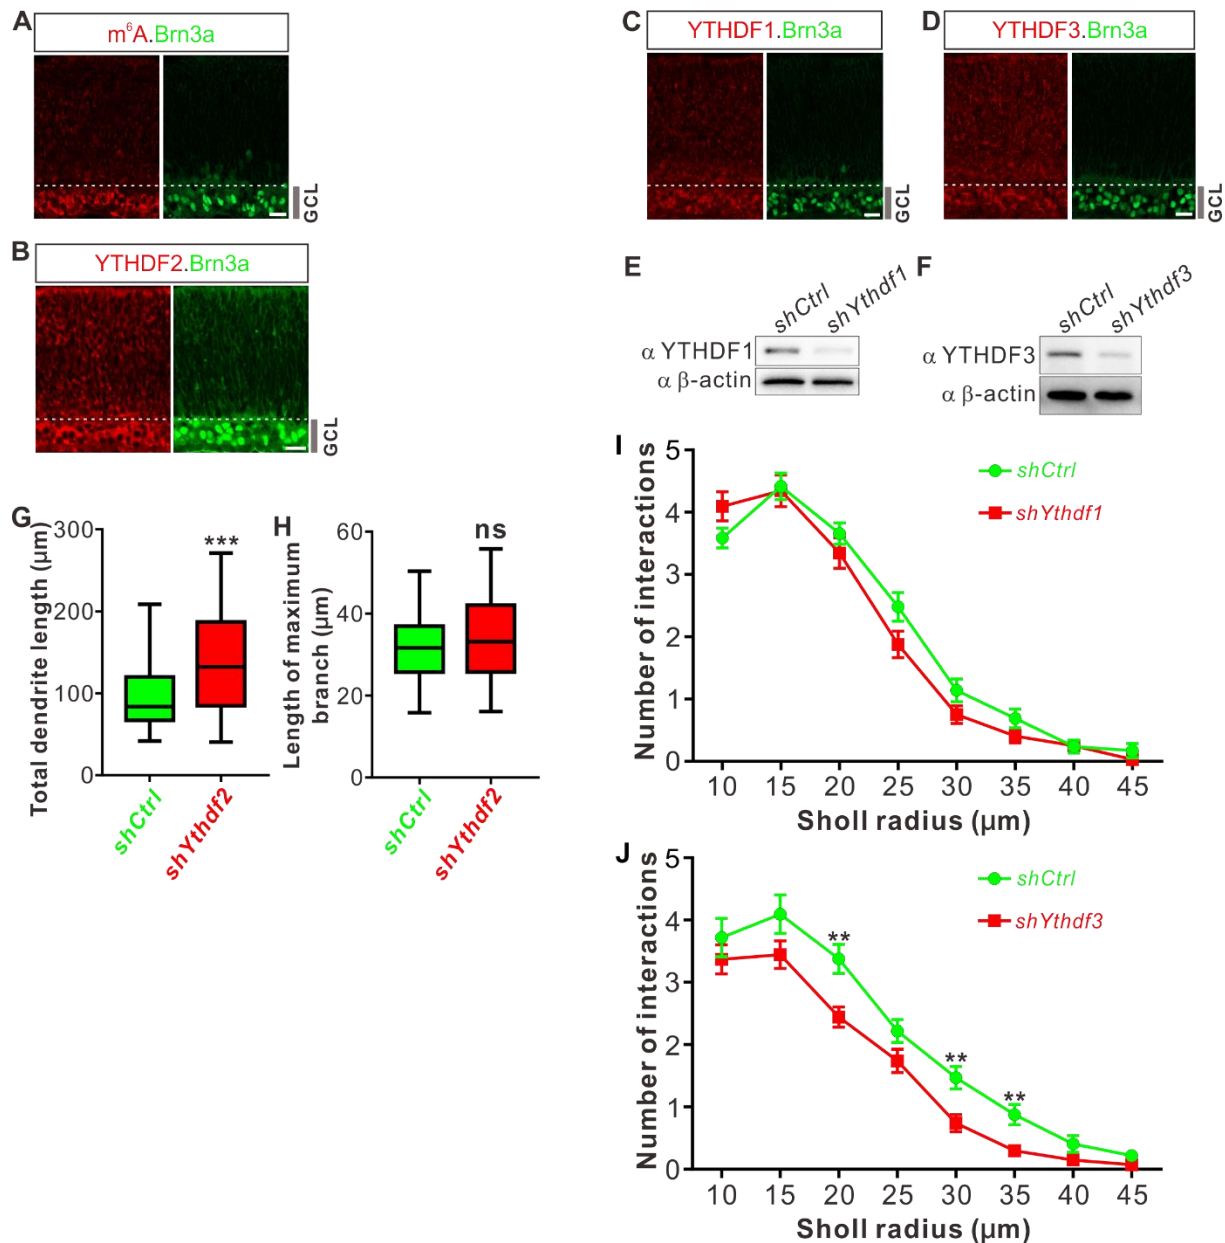

879  
 880 **Figure 1—figure supplement 1. RGC have high level of m<sup>6</sup>A modification and strong expression of**  
 881 **YTHDFs.**

882 **(A-D)** Representative confocal images showing high levels of m<sup>6</sup>A modification **(A)**, and strong  
883 expressions of YTHDF2 **(B)**, YTHDF1 **(C)**, and YTHDF3 **(D)** in RGCs (marked by Brn3a) in P0 retina. Scale  
884 bars: 20 μm.

885 **(E, F)** Western blotting (WB) confirming efficient knockdown (KD) of YTHDF1 and YTHDF3 in cultured  
886 RGCs using *shYthdf1* and *shYthdf3*, respectively.

887 **(G, H)** Quantification of total length **(G)** and length of maximum branch **(H)** of RGC dendrites after  
888 YTHDF2 KD. Data are represented as box and whisker plots:  $n = 36$  RGCs for *shCtrl*,  $n = 32$  RGCs for  
889 *shYthdf2*; \*\*\* $p = 0.00062$  for **G**;  $p = 0.22$  for **H**; ns, not significant; by unpaired Student's *t* test.

890 **(I, J)** Quantification of dendrite branching using Sholl analysis after YTHDF1 KD **(I)** and YTHDF3 KD **(J)**.  
891 Data are mean ± SEM. In **I**,  $n = 29$  RGCs for *shCtrl*,  $n = 32$  RGCs for *shYthdf1*, all not significant; in **J**,  $n =$   
892  $32$  RGCs for *shCtrl*,  $n = 27$  RGCs for *shYthdf3*, \*\* $p = 0.0028$  (20 μm), \*\* $p = 0.0028$  (30 μm), \*\* $p =$   
893  $0.0052$  (35 μm); by unpaired Student's *t* test.

894

895

896

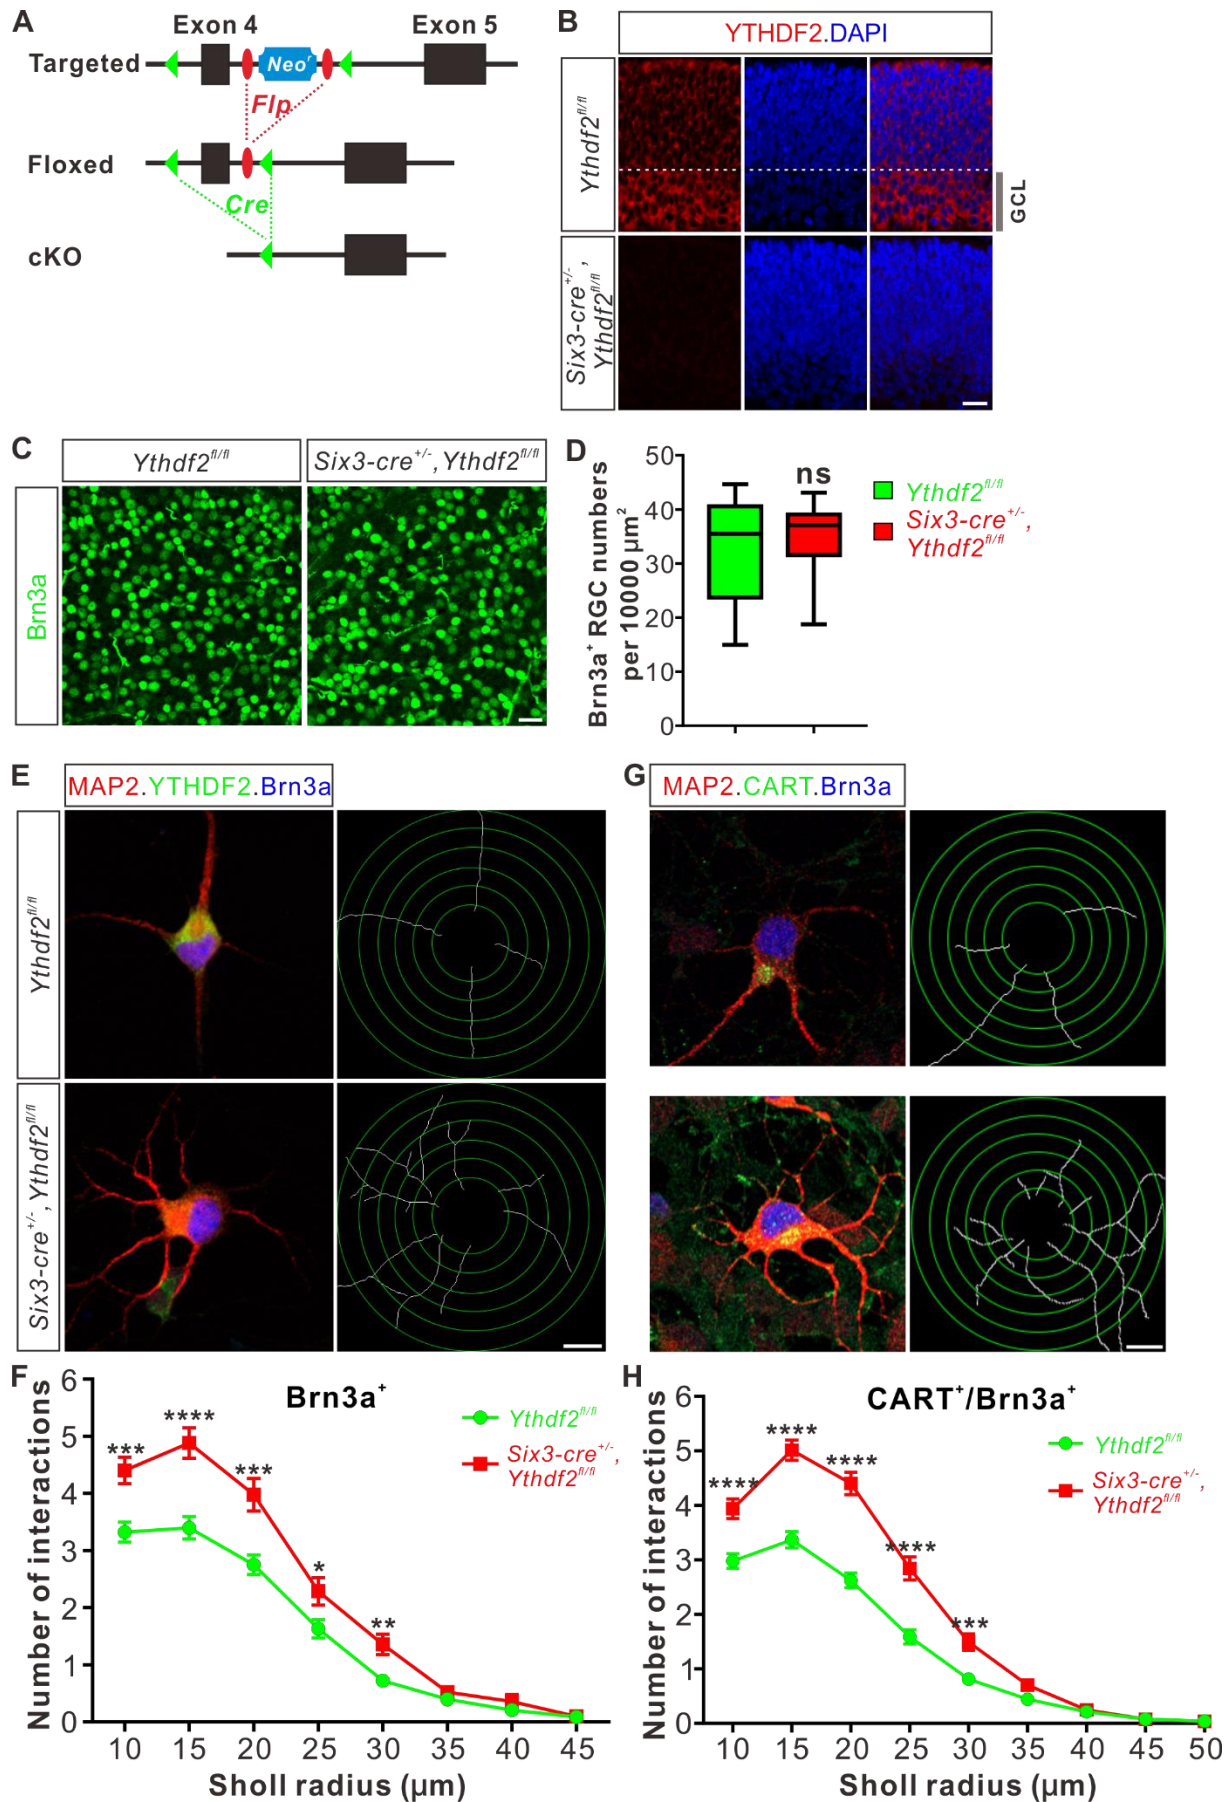

897

898 **Figure 2. Dendrite branching is dramatically increased in cultured RGCs from *Ythdf2* cKO.**

899 **(A)** Schematic drawings of the genetic deletion strategy for *Ythdf2*. Exon 4 which contains YTH  
900 domain-coding sequence is deleted after Cre-mediated recombination.

901 **(B)** Depletion of YTHDF2 protein in retina of *Six3-cre<sup>+/-</sup>;Ythdf2<sup>fl/fl</sup>* cKO mice. Anti-YTHDF2  
902 immunostaining of E15.5 retina vertical sections confirmed cKO of YTHDF2 protein, compared with  
903 *Ythdf2<sup>fl/fl</sup>* littermate controls. Scale bar: 20  $\mu\text{m}$ .

904 **(C, D)** RGC neurogenesis not affected in the *Ythdf2* cKO retina. Wholemount immunostaining using a  
905 Brn3a antibody was carried out in P20 retina **(C)**. Numbers of Brn3a<sup>+</sup> RGC per 10000  $\mu\text{m}^2$  of retina  
906 were quantified and showed no difference between the *Ythdf2* cKO and their littermate controls **(D)**.  
907  $n = 12$  confocal fields for each genotype. Data are represented as box and whisker plots: ns, not  
908 significant ( $p = 0.79$ ); by unpaired Student's *t* test. Scale bar: 25  $\mu\text{m}$ .

909 **(E)** Examination of RGC dendrite development in *Ythdf2* cKO RGCs. As shown, knockout of YTHDF2  
910 was confirmed by YTHDF2 IF (green). Significantly increased branching of dendrites marked by MAP2  
911 IF (red) was observed in cultured RGCs from the *Ythdf2* cKO retina compared with their littermate  
912 controls. Dendrite traces were drawn for the corresponding RGCs. Scale bar: 10  $\mu\text{m}$ .

913 **(F)** Quantification of RGC dendrite branching **(E)** using Sholl analysis. Data are mean  $\pm$  SEM. Numbers  
914 of interactions are significantly greater in *Six3-cre<sup>+/-</sup>,Ythdf2<sup>fl/fl</sup>* groups ( $n = 68$  RGCs) than *Ythdf2<sup>fl/fl</sup>*  
915 groups ( $n = 42$  RGCs) in Sholl radii between 10-30  $\mu\text{m}$ : \*\*\* $p = 0.00030$  (10  $\mu\text{m}$ ), \*\*\*\* $p = 1.19\text{E-}05$  (15  
916  $\mu\text{m}$ ), \*\*\* $p = 0.00018$  (20  $\mu\text{m}$ ), \* $p = 0.021$  (25  $\mu\text{m}$ ), \*\* $p = 0.0022$  (30  $\mu\text{m}$ ), by unpaired Student's *t* test.

917 **(G)** Examination of CART<sup>+</sup> RGC dendrite development in *Ythdf2* cKO RGCs. Cultured CART<sup>+</sup> RGCs from  
918 the *Ythdf2* cKO retina have significantly increased branching of dendrites marked by MAP2 IF (red)  
919 compared with their littermate controls. Dendrite traces were drawn for the corresponding RGCs.  
920 Scale bar: 10  $\mu\text{m}$ .

921 **(H)** Quantification of CART<sup>+</sup> RGC dendrite branching **(G)** using Sholl analysis. Data are mean  $\pm$  SEM.  
922 Numbers of interactions are significantly greater in *Six3-cre<sup>+/-</sup>,Ythdf2<sup>fl/fl</sup>* groups ( $n = 77$  RGCs) than  
923 *Ythdf2<sup>fl/fl</sup>* groups ( $n = 90$  RGCs) in Sholl radii between 10-30  $\mu\text{m}$ : \*\*\*\* $p = 3.17\text{E-}05$  (10  $\mu\text{m}$ ), \*\*\*\* $p =$

924 6.50E-11 (15  $\mu\text{m}$ ), \*\*\*\* $p = 5.14\text{E-}12$  (20  $\mu\text{m}$ ), \*\*\*\* $p = 5.00\text{E-}07$  (25  $\mu\text{m}$ ), \*\*\* $p = 0.00020$  (30  $\mu\text{m}$ ), by

925 unpaired Student's  $t$  test.

926

927



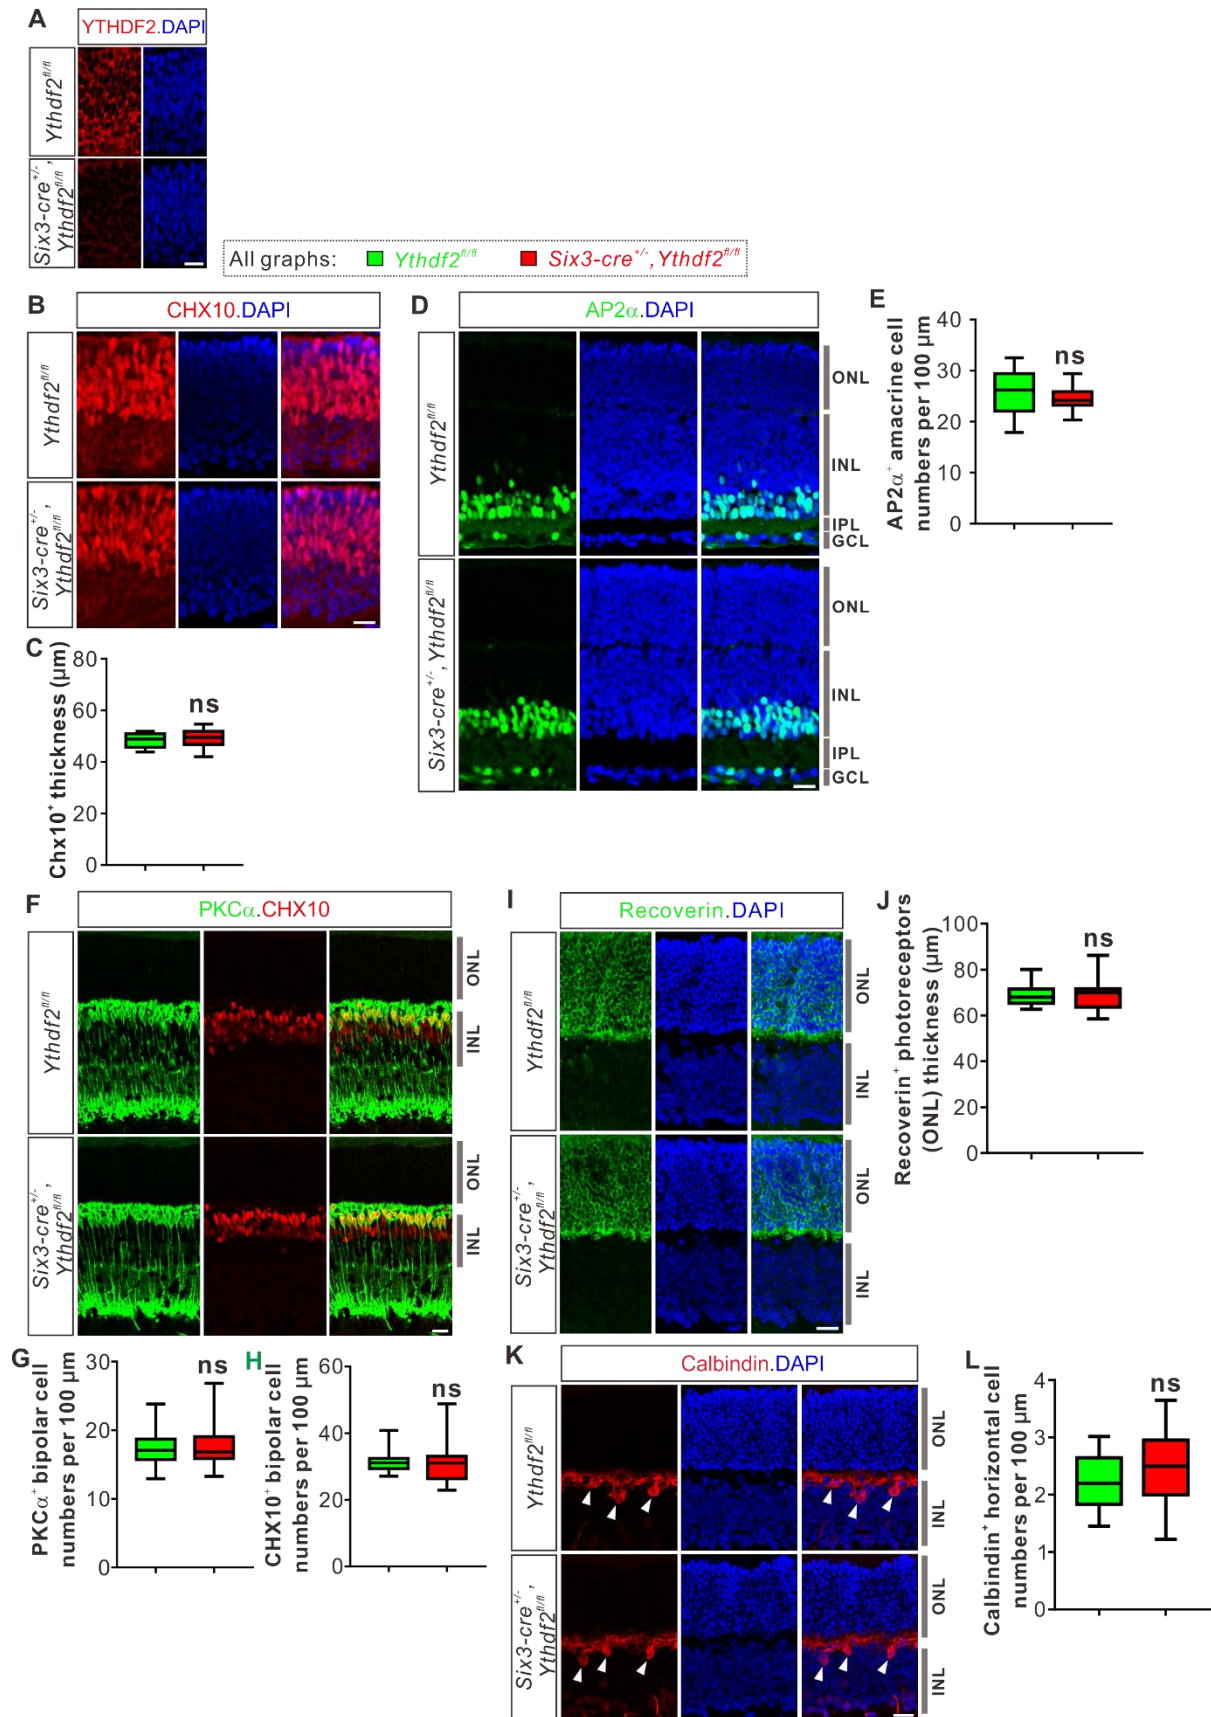

928

929 **Figure 2—figure supplement 1. *Ythdf2* cKO does not change numbers of retinal progenitors,**

930 **amacrine cells, bipolar cells, photoreceptors, or horizontal cells.**

931 **(A)** YTHDF2 protein was efficiently knocked out in the retinas of Six3-Cre-mediated *Ythdf2* cKO mice  
932 at E12.5.

933 **(B, C)** Retinal progenitors not affected in *Ythdf2* cKO retina. CHX10 IF was used to label retinal  
934 progenitors at E15.5 **(B)**. Thickness of CHX10<sup>+</sup> retinal layer was quantified and showed no difference  
935 between the *Ythdf2* cKO retina ( $n = 10$  sections) and their littermate controls ( $n = 19$  sections) **(C)**.

936 **(D, E)** Amacrine cells not affected in the *Ythdf2* cKO retina. AP2 $\alpha$  IF was used to mark amacrine cells  
937 in P6 retina **(D)**. Numbers of AP2 $\alpha$ <sup>+</sup> amacrine cells per 100  $\mu\text{m}$  of layer width in retina vertical  
938 sections were quantified and showed no difference between the *Ythdf2* cKO ( $n = 26$  sections) and  
939 littermate controls ( $n = 26$  sections) **(E)**. ONL, outer nuclear layer; INL, inner nuclear layer; IPL, inner  
940 plexiform layer.

941 **(F-H)** Bipolar cells not changed in the *Ythdf2* cKO retina. PKC $\alpha$  and CHX10 IF were used to label  
942 different bipolar cells in P15 retina **(F)**. Numbers of PKC $\alpha$ <sup>+</sup> and CHX10<sup>+</sup> bipolar cells per 100  $\mu\text{m}$  of  
943 layer width in retina vertical sections were quantified and showed no difference between the *Ythdf2*  
944 cKO ( $n = 18$  sections for PKC $\alpha$ <sup>+</sup> in **G**,  $n = 19$  sections for CHX10<sup>+</sup> in **H**) and littermate controls ( $n = 18$   
945 sections for PKC $\alpha$ <sup>+</sup> in **G**,  $n = 19$  sections for CHX10<sup>+</sup> in **H**).

946 **(I, J)** Photoreceptors not changed in the *Ythdf2* cKO retina. Recoverin IF was used to label  
947 photoreceptors in P20 retina **(I)**. Thickness of Recoverin<sup>+</sup> photoreceptor layer (e.g. ONL) in the retinal  
948 vertical sections was quantified and showed no difference between the *Ythdf2* cKO ( $n = 34$  confocal  
949 fields) and littermate controls ( $n = 30$  confocal fields) **(J)**.

950 **(K, L)** Horizontal cells not affected in the *Ythdf2* cKO retina. Calbindin IF was used to mark horizontal  
951 cells in P20 retina (arrowheads in **K**). Numbers of Calbindin<sup>+</sup> horizontal cells per 100  $\mu\text{m}$  of layer  
952 width in retina vertical sections were quantified and showed no difference between the *Ythdf2* cKO  
953 ( $n = 17$  sections) and littermate controls ( $n = 17$  sections) **(L)**.

954 All quantification data are represented as box and whisker plots: ns, not significant;  $p = 0.41$  for **C**,  $p =$   
955  $0.16$  for **E**,  $p = 0.82$  for **G**,  $p = 0.97$  for **H**,  $p = 0.89$  for **J**,  $p = 0.19$  for **L**; by unpaired Student's  $t$  test.

956 Scale bars: 20  $\mu\text{m}$ .

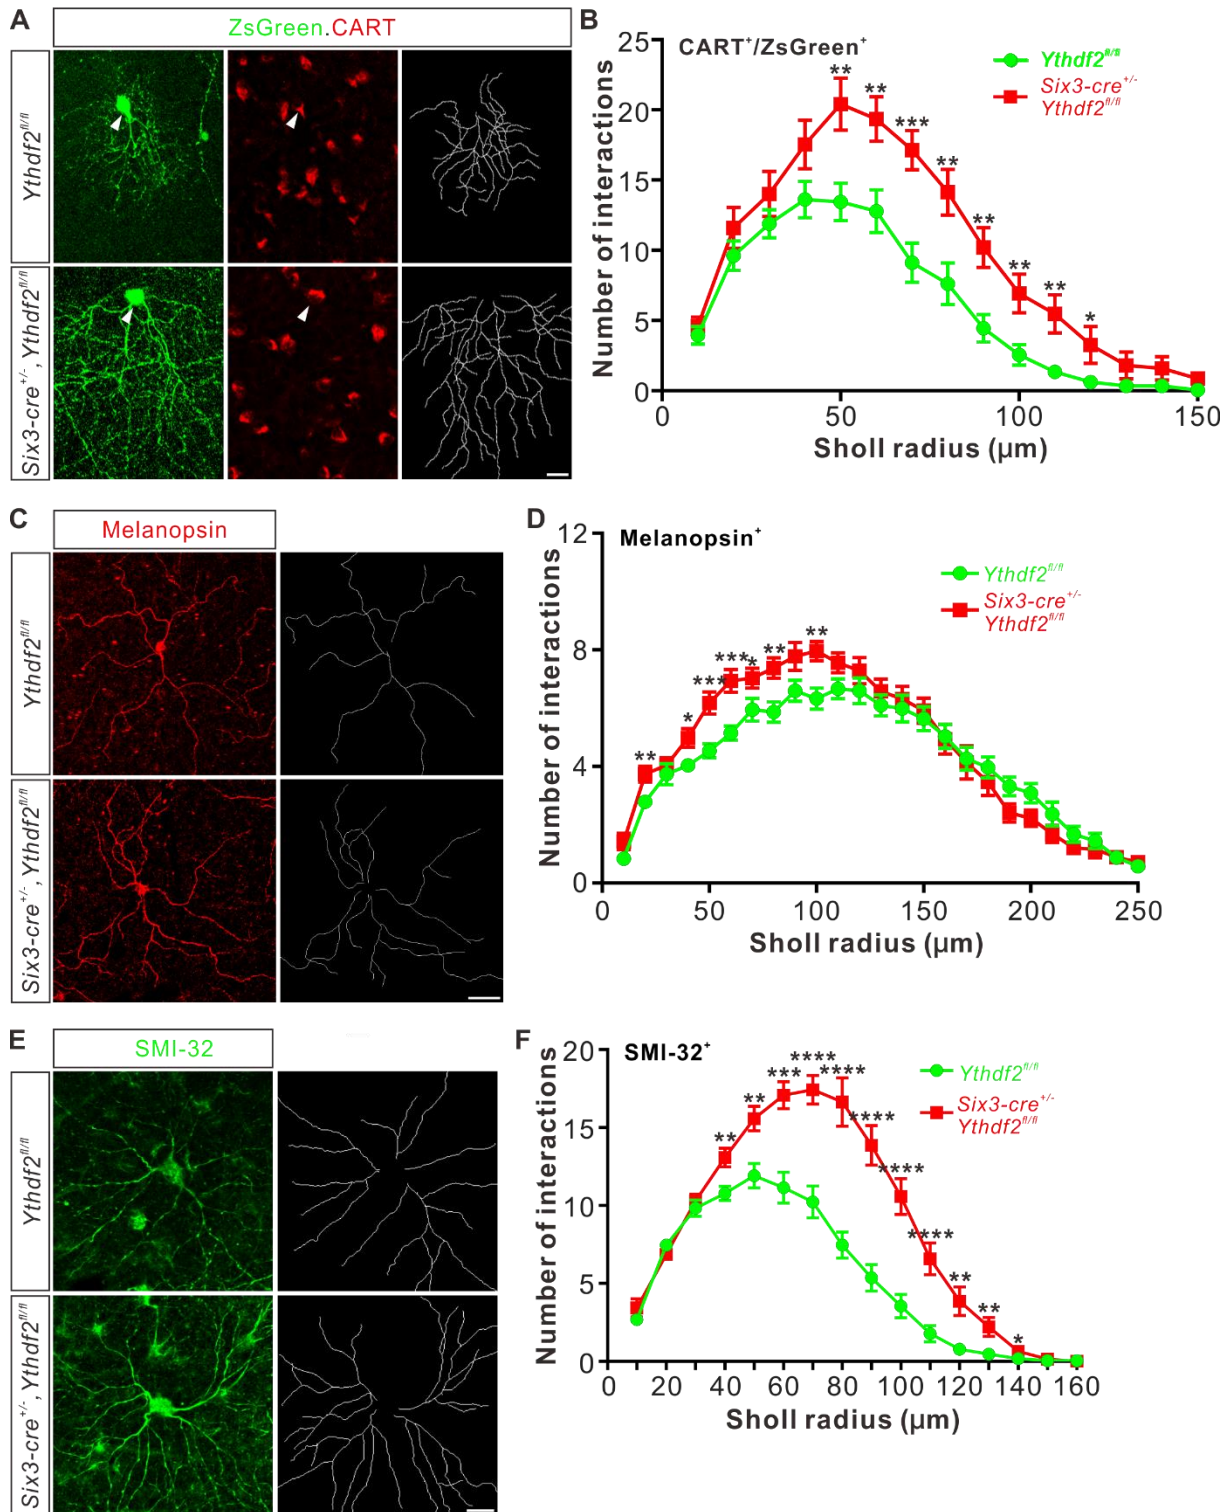

957

958 **Figure 3. Dendrite branching of specific RGC subtypes increases in *Ythdf2* cKO in vivo.**

959 **(A)** Co-labeling of oDSGCs by AAV-ZsGreen and CART IF in vivo. Intravitreal injection of AAV

960 expressing ZsGreen reporter was performed at P17 and retinas were collected at P27. The white

961 arrowheads indicate oDSGCs co-labeled by ZsGreen and CART IF, which show dramatically increased

962 dendrite branching in *Ythdf2* cKO compared with control. Dendrite traces were drawn for the  
963 corresponding RGCs shown. Scale bar: 20  $\mu\text{m}$ .

964 **(B)** Quantification of dendrite branching of ZsGreen<sup>+</sup>/CART<sup>+</sup> ooDSGCs **(A)** using Sholl analysis. Data  
965 are mean  $\pm$  SEM. Numbers of interactions are significantly greater in *Six3-cre*<sup>+/-</sup>, *Ythdf2*<sup>fl/fl</sup> groups ( $n =$   
966 15 RGCs) than *Ythdf2*<sup>fl/fl</sup> groups ( $n = 18$  RGCs) in Sholl radii between 50-120  $\mu\text{m}$ : \*\* $p = 0.0041$  (50  $\mu\text{m}$ ),  
967 \*\* $p = 0.0059$  (60  $\mu\text{m}$ ), \*\*\* $p = 0.00036$  (70  $\mu\text{m}$ ), \*\* $p = 0.0058$  (80  $\mu\text{m}$ ), \*\* $p = 0.0018$  (90  $\mu\text{m}$ ), \*\* $p =$   
968 0.0064 (100  $\mu\text{m}$ ), \*\* $p = 0.0045$  (110  $\mu\text{m}$ ), \* $p = 0.040$  (120  $\mu\text{m}$ ), by unpaired Student's  $t$  test.

969 **(C)** Dendrites of ipRGCs visualized by wholemount immunostaining of P20 retina using a melanopsin  
970 antibody in vivo. Dendrite traces were drawn for the corresponding RGCs shown. Scale bar: 50  $\mu\text{m}$ .

971 **(D)** Quantification of dendrite branching of melanopsin<sup>+</sup> ipRGCs **(C)** using Sholl analysis. Data are  
972 mean  $\pm$  SEM. Numbers of interactions are significantly greater in *Six3-cre*<sup>+/-</sup>, *Ythdf2*<sup>fl/fl</sup> groups ( $n = 18$   
973 RGCs) than *Ythdf2*<sup>fl/fl</sup> groups ( $n = 21$  RGCs) in Sholl radii between 20-100  $\mu\text{m}$ : \*\* $p = 0.0083$  (20  $\mu\text{m}$ ),  
974 \* $p = 0.018$  (40  $\mu\text{m}$ ), \*\*\* $p = 0.00068$  (50  $\mu\text{m}$ ), \*\*\* $p = 0.00027$  (60  $\mu\text{m}$ ), \* $p = 0.048$  (70  $\mu\text{m}$ ), \*\* $p =$   
975 0.0048 (80  $\mu\text{m}$ ), \*\* $p = 0.0023$  (100  $\mu\text{m}$ ), by unpaired Student's  $t$  test.

976 **(E)** Dendrites of  $\alpha$ RGCs visualized by wholemount immunostaining of P20 retina using a SMI-32  
977 antibody in vivo. Dendrite traces were drawn for the corresponding RGCs shown. Scale bar: 20  $\mu\text{m}$ .

978 **(F)** Quantification of dendrite branching of SMI-32<sup>+</sup>  $\alpha$ RGCs **(E)** using Sholl analysis. Data are mean  $\pm$   
979 SEM. Numbers of interactions are significantly greater in *Six3-cre*<sup>+/-</sup>, *Ythdf2*<sup>fl/fl</sup> groups ( $n = 14$  RGCs)  
980 than *Ythdf2*<sup>fl/fl</sup> groups ( $n = 22$  RGCs) in Sholl radii between 40-140  $\mu\text{m}$ : \*\* $p = 0.0044$  (40  $\mu\text{m}$ ), \*\* $p =$   
981 0.0035 (50  $\mu\text{m}$ ), \*\*\* $p = 0.00021$  (60  $\mu\text{m}$ ), \*\*\*\* $p = 2.63\text{E-}05$  (70  $\mu\text{m}$ ), \*\*\*\* $p = 2.38\text{E-}06$  (80  $\mu\text{m}$ ),  
982 \*\*\*\* $p = 1.68\text{E-}06$  (90  $\mu\text{m}$ ), \*\*\*\* $p = 6.76\text{E-}06$  (100  $\mu\text{m}$ ), \*\*\*\* $p = 5.72\text{E-}05$  (110  $\mu\text{m}$ ), \*\* $p = 0.0011$  (120  
983  $\mu\text{m}$ ), \*\* $p = 0.0032$  (130  $\mu\text{m}$ ), \* $p = 0.047$  (140  $\mu\text{m}$ ), by unpaired Student's  $t$  test.

984

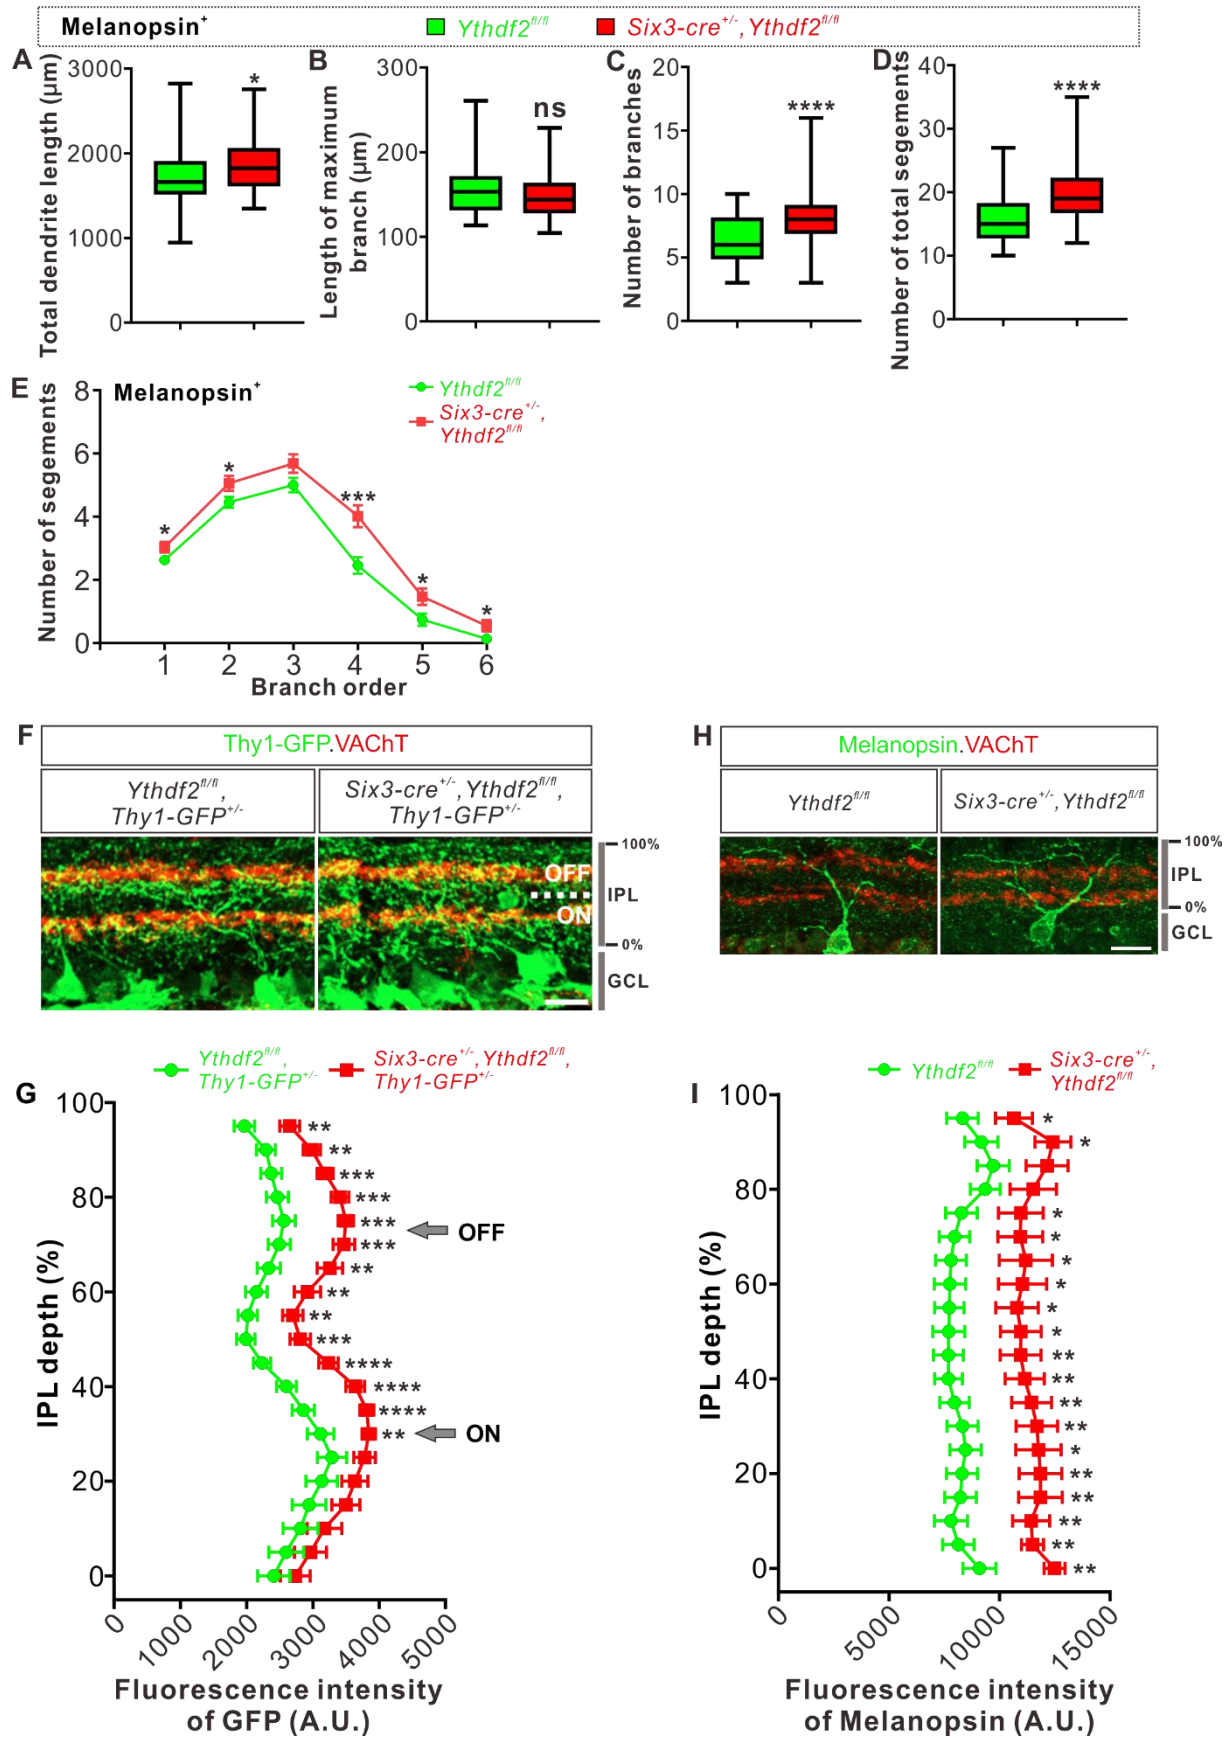

985

986 **Figure 3—figure supplement 1. General dendrite density in IPL is increased without affecting**  
987 **sublaminar targeting.**

988 **(A-E)** Quantification of total length **(A)**, length of maximum branch **(B)**, branch numbers **(C)**, number  
989 of total segments **(D)**, and numbers of segments on each branch order **(E)** of melanopsin<sup>+</sup> ipRGCs  
990 dendrites visualized by wholemount immunostaining of P20 retina using a melanopsin antibody in  
991 vivo (shown in *Figure 3C*). Data are represented as box and whisker plots in **A-D**:  $n = 58$  RGCs for  
992 *Ythdf2<sup>fl/fl</sup>*,  $n = 51$  RGCs for *Six3-cre<sup>+/-</sup>, Ythdf2<sup>fl/fl</sup>*; \* $p = 0.040$  for **A**;  $p = 0.12$  for **B**; \*\*\*\* $p = 1.39E-06$  for **C**;  
993 \* $p = 7.89E-08$  for **D**; ns, not significant. Data are mean  $\pm$  SEM in **E**: \* $p = 0.038$  (branch order 1), \* $p =$   
994  $0.039$  (branch order 2), \*\*\* $p = 0.00045$  (branch order 4), \* $p = 0.026$  (branch order 5), \* $p = 0.029$   
995 (branch order 6). All by unpaired Student's *t* test.

996 **(F)** Cross-sections of the IPL showing dendritic sublaminar patterning of Thy1-GFP<sup>+</sup> RGCs in P20  
997 control and *Ythdf2* cKO retina. ON and OFF refer to the ON-OFF bipartite divisions of the IPL marked  
998 by VAcHT. Scale bar: 20  $\mu$ m.

999 **(G)** Quantification and distribution of GFP intensities from Thy1-GFP<sup>+</sup> RGC dendrites through the  
1000 depth of IPL shown in **(F)**. GFP IF intensities are increased for the 30-95% depth of IPL in the *Ythdf2*  
1001 cKO retina compared with their littermate controls, but the general patterning is similar between the  
1002 two genotypes. Data are mean  $\pm$  SEM ( $n = 13$  sections for each genotype): \*\* $p = 0.0039$  (95%), \*\* $p =$   
1003  $0.0014$  (90%), \*\*\* $p = 0.00049$  (85%), \*\*\* $p = 0.00020$  (80%), \*\*\* $p = 0.00018$  (75%), \*\*\* $p = 0.00036$   
1004 (70%), \*\* $p = 0.0018$  (65%), \*\* $p = 0.0067$  (60%), \*\* $p = 0.0040$  (55%), \*\*\* $p = 0.00057$  (50%), \*\*\*\* $p =$   
1005  $3.48E-05$  (45%), \*\*\*\* $p = 4.76E-05$  (40%), \*\*\*\* $p = 6.85E-05$  (35%), \*\* $p = 0.0034$  (30%), by unpaired  
1006 Student's *t* test. Arrows indicate peaks of VAcHT signals.

1007 **(H)** Cross-sections of the IPL showing dendritic sublaminar patterning of melanopsin<sup>+</sup> ipRGCs in P20  
1008 control and *Ythdf2* cKO retina. Scale bar: 20  $\mu$ m.

1009 **(I)** Quantification and distribution of melanopsin IF intensities from melanopsin<sup>+</sup> ipRGC dendrites  
1010 through the depth of IPL shown in **(H)**. Melanopsin IF intensities are increased in the *Ythdf2* cKO  
1011 retina compared with their littermate controls, but the general patterning is similar between the two

1012 genotypes. Data are mean  $\pm$  SEM ( $n = 11$  neurons for control,  $n = 8$  neurons for *Ythdf2* cKO): \* $p =$   
 1013 0.049 (95%), \* $p = 0.010$  (90%), \* $p = 0.039$  (75%), \* $p = 0.022$  (70%), \* $p = 0.019$  (65%), \* $p = 0.018$   
 1014 (60%), \* $p = 0.016$  (55%), \* $p = 0.013$  (50%), \*\* $p = 0.0095$  (45%), \*\* $p = 0.0044$  (40%), \*\* $p = 0.0053$   
 1015 (35%), \*\* $p = 0.0091$  (30%), \* $p = 0.014$  (25%), \*\* $p = 0.0074$  (20%), \*\* $p = 0.0071$  (15%), \*\* $p = 0.0053$   
 1016 (10%), \*\* $p = 0.0025$  (5%), \*\* $p = 0.0029$  (0%), by unpaired Student's *t* test.  
 1017

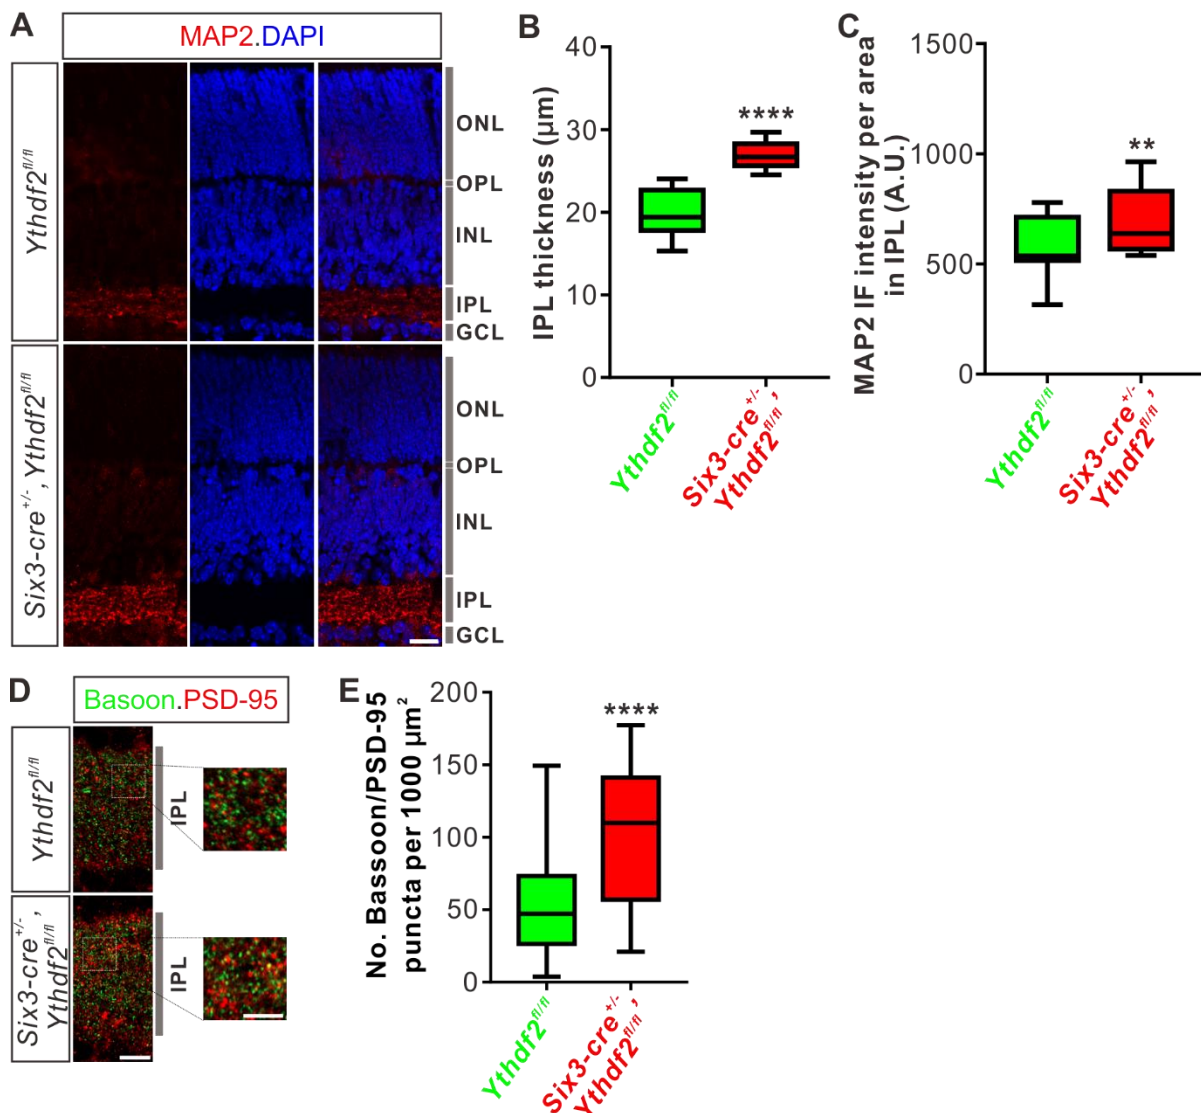

1018

1019 **Figure 4. IPL of the *Ythdf2* cKO retina is thicker and has more synapses.**

1020 **(A)** Cross-sections of P6 *Six3-cre*<sup>+/-</sup>, *Ythdf2*<sup>fl/fl</sup> retina showing increased IPL thickness by MAP2 staining

1021 compared with littermate control. ONL, outer nuclear layer; OPL, outer plexiform layer; INL, inner

1022 nuclear layer; IPL, inner plexiform layer; GCL, granule cell layer. Scale bar: 20  $\mu\text{m}$ .

1023 (B, C) Quantification showing increased IPL thickness and MAP2 IF intensity per area in IPL of the  
1024 *Ythdf2* cKO retina (A). Quantification data are represented as box and whisker plots: \*\*\* $p = 1.28E-07$   
1025 for B ( $n = 12$  sections for each genotype), by unpaired Student's *t* test; \*\* $p = 0.0045$  for C ( $n = 12$   
1026 sections for each genotype), by paired Student's *t* test.  
1027 (D, E) Representative confocal images showing the excitatory synapses labeled by co-localization of  
1028 Bassoon (presynaptic) and PSD-95 (postsynaptic) in the IPL of P30 retina (D). There are significantly  
1029 more synapses in the *Ythdf2* cKO IPL compared with control. Quantification data are represented as  
1030 box and whisker plots (E):  $n = 47$  confocal fields for *Ythdf2*<sup>fl/fl</sup>,  $n = 23$  confocal fields for *Six3-cre*<sup>+/-</sup>  
1031 , *Ythdf2*<sup>fl/fl</sup>; \*\* $p = 1.63E-05$ ; by unpaired Student's *t* test. Scale bars: 10  $\mu\text{m}$  (D) and 5  $\mu\text{m}$  (inset in D).  
1032

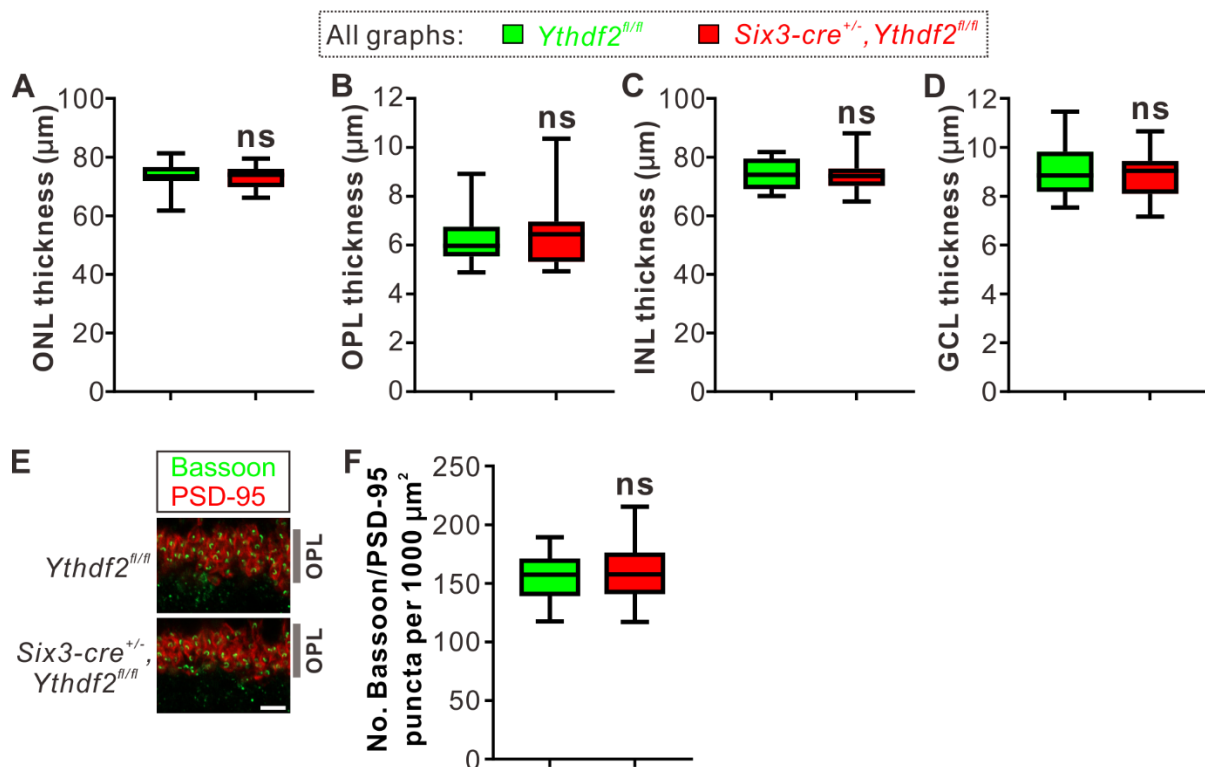

1033  
1034 **Figure 4—figure supplement 1. Thickness or synapse numbers in OPL shows no difference between**  
1035 **the *Ythdf2* cKO and control retinas.**

1036 (A-D) Quantification of the thickness of different layers by MAP2/DAPI IF in P6 *Ythdf2* cKO and  
1037 control retinas as shown in Figure 4A. Data are represented as box and whisker plots:  $n = 14$  sections



1038 for each genotype;  $p = 0.60$  for ONL in **A**,  $p = 0.61$  for OPL in **B**,  $p = 0.84$  for INL in **C**,  $p = 0.62$  for GCL  
1039 in **D**; ns, not significant; by unpaired Student's  $t$  test.  
1040 **(E, F)** Representative confocal images showing the excitatory ribbon synapses labeled by co-  
1041 localization of Bassoon (presynaptic) and PSD-95 (postsynaptic) in the OPL of P30 retina **(E)**, which  
1042 shows no difference between *Ythdf2* cKO and control. Quantification data are represented as box  
1043 and whisker plots **(F)**:  $n = 39$  confocal fields for *Ythdf2*<sup>fl/fl</sup>,  $n = 36$  confocal fields for *Six3-cre*<sup>+/-</sup>,*Ythdf2*<sup>fl/fl</sup>;  
1044  $p = 0.66$ ; ns, not significant; by unpaired Student's  $t$  test. Scale bar: 5  $\mu$ m.  
1045

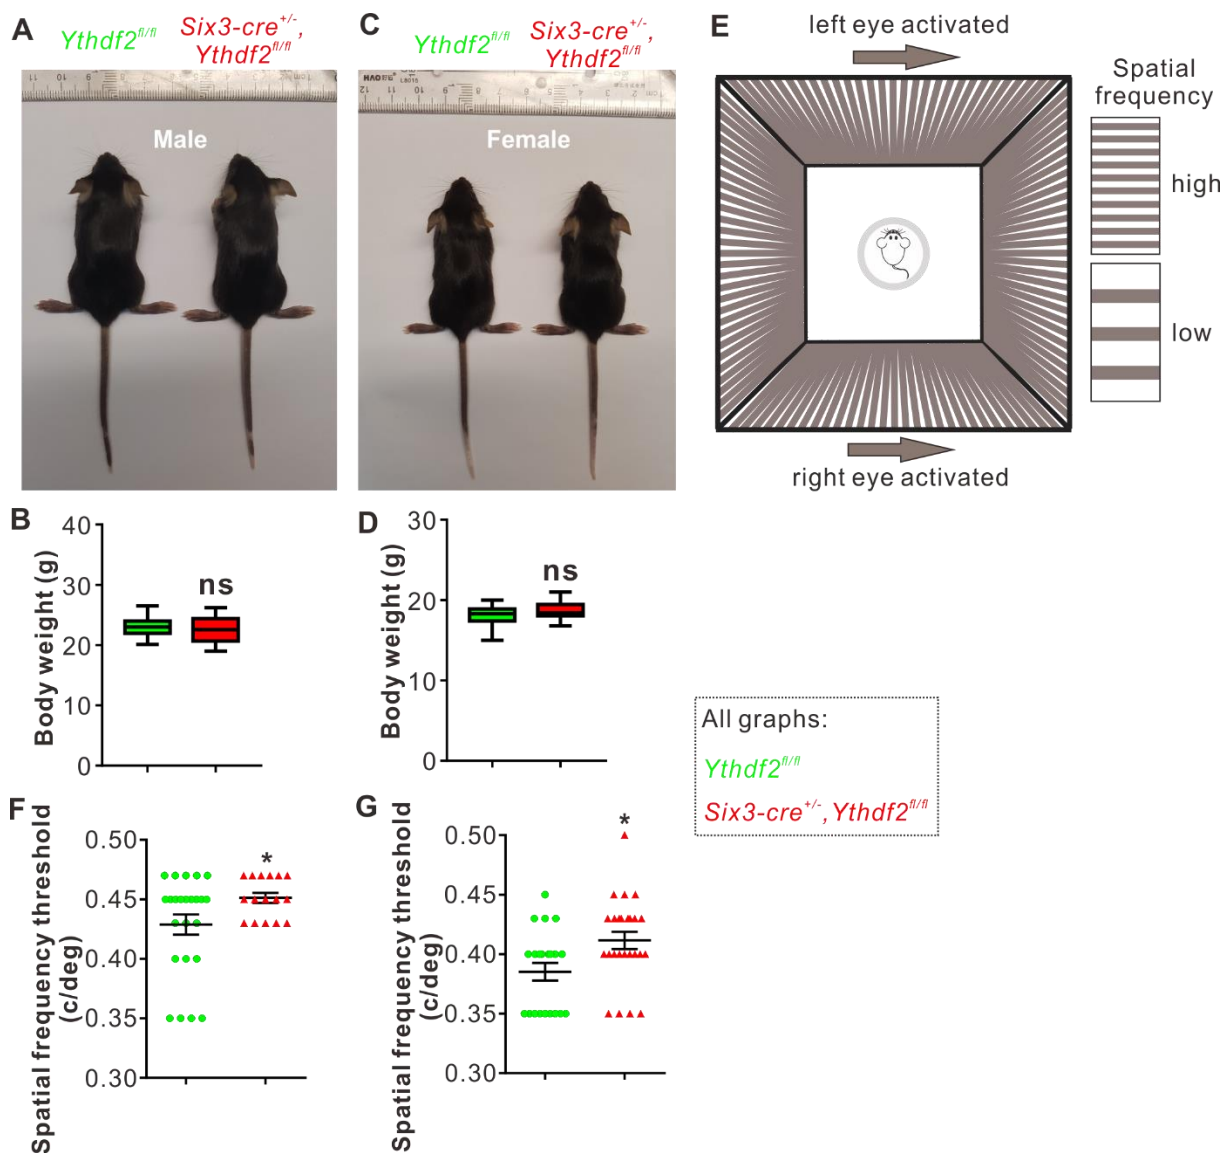

1046

1047 **Figure 5. Visual acuity is improved for the *Ythdf2* cKO mice.**

1048 **(A-D)** Six3-Cre-mediated *Ythdf2* cKO showing normal animal development and body weight (male in  
1049 **A**, female in **C**). Quantification data of body weight (**B**, **D**) are represented as box and whisker plots:  $p$   
1050 = 0.41 in **B** (male,  $n = 24$  for control,  $n = 18$  for cKO);  $p = 0.08$  in **D** (female,  $n = 23$  for control,  $n = 25$   
1051 for cKO); ns, not significant; by unpaired Student's  $t$  test.  
1052 **(E)** The setup of optomotor response assay is illustrated by schematic drawing.  
1053 **(F, G)** Optomotor response assay demonstrating improved visual acuity in the *Ythdf2* cKO mice.  
1054 Quantification data are mean  $\pm$  SEM:  $*p = 0.048$  in **F** (male,  $n = 24$  control,  $n = 16$  cKO);  $*p = 0.015$  in  
1055 **G** (female,  $n = 21$  control,  $n = 25$  cKO); by unpaired Student's  $t$  test.  
1056

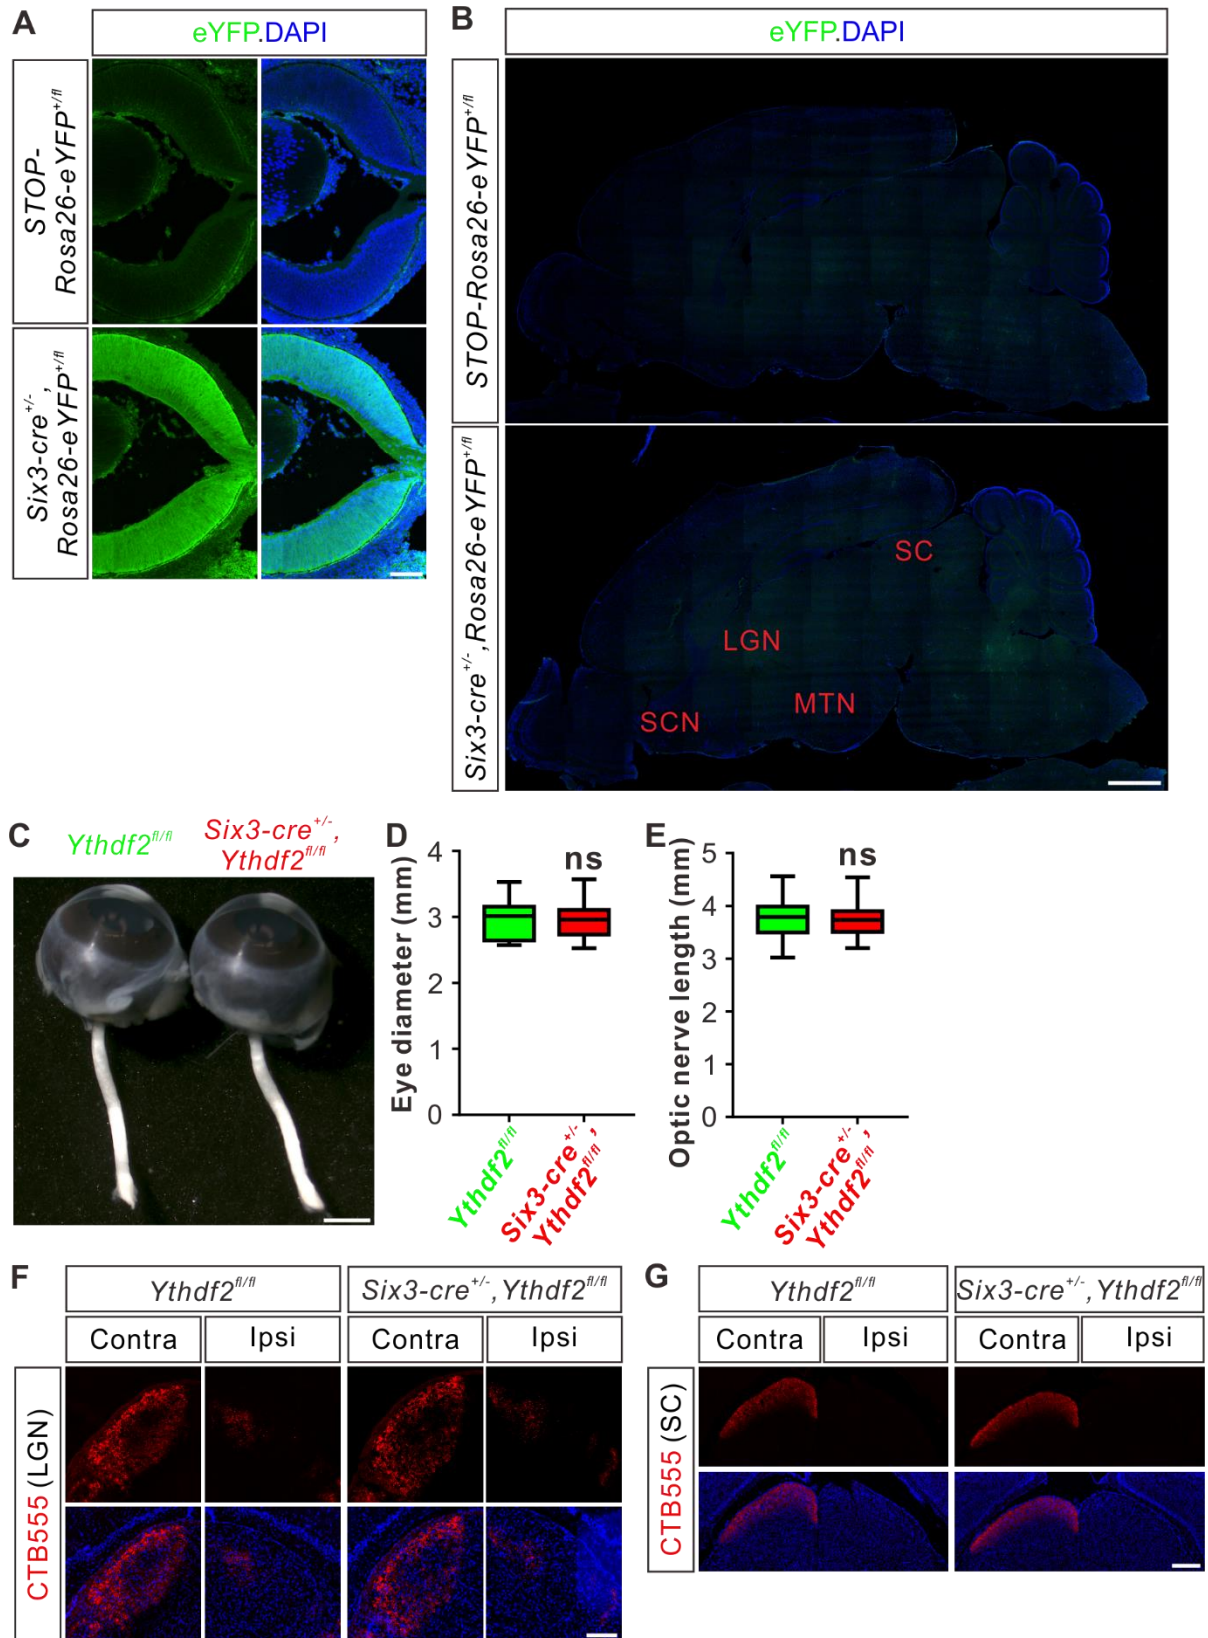

1057

1058 **Figure 5—figure supplement 1. Guidance or central targeting of optic nerves is not affected in Six-**

1059 **Cre-mediated *Ythdf2* cKO.**

1060 **(A)** Cross-sections of E14.5 retina showing strong expression of Six3-Cre using an eYFP reporter. Scale  
1061 bar: 100  $\mu\text{m}$ .

1062 **(B)** Sagittal sections of P10 brain showing negligible expression of Six3-Cre in the potential RGC target  
1063 regions in the brain. SCN, suprachiasmatic nucleus; LGN, lateral geniculate nucleus; MTN, medial  
1064 terminal nucleus; SC, superior colliculus. Scale bar: 1 mm.

1065 **(C-E)** Normal eye diameter and optic nerve length. Quantification data **(D, E)** are represented as box  
1066 and whisker plots:  $p = 0.80$  ( $n = 31$  for each genotype in **D**);  $p = 0.99$  ( $n = 31$  for each genotype in **E**);  
1067 ns, not significant; by unpaired Student's  $t$  test. Scale bar: 1 mm.

1068 **(F, G)** Representative images of coronal sections through the LGN **(F)** and SC **(G)** after unilateral  
1069 injection of CTB-Alexa Fluor 555 at P37 in *Ythdf2* cKO and control mice. Projections to the  
1070 contralateral (Contra), ipsilateral (Ipsi) LGN and contralateral (Contra) SC are visible, which shows no  
1071 difference between *Ythdf2* cKO and control mice. Scale bars: 100  $\mu\text{m}$  **(F)** and 200  $\mu\text{m}$  **(G)**.

1072

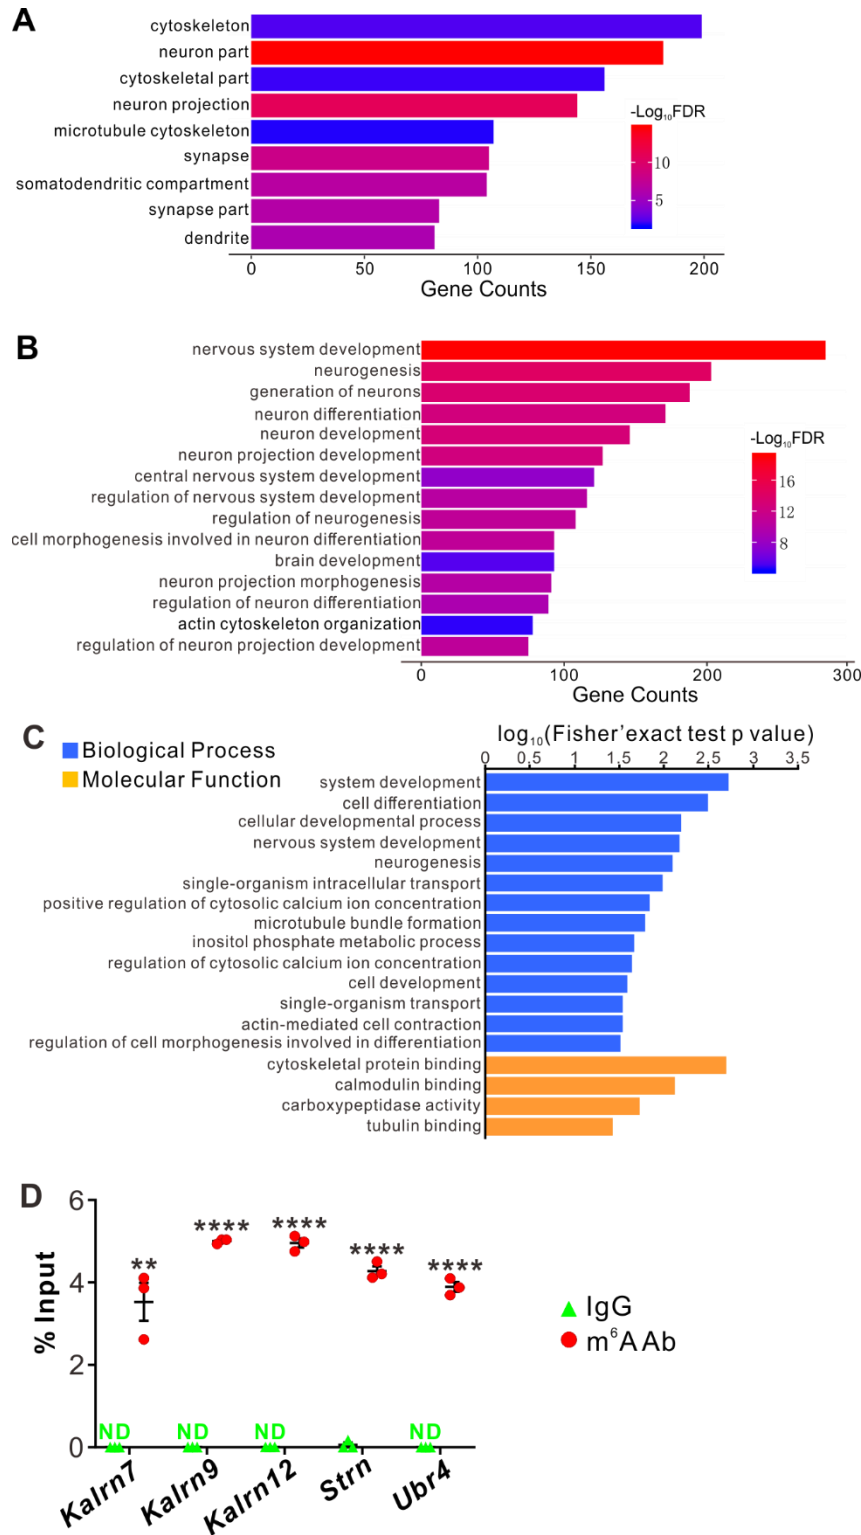

1073

1074 **Figure 6. YTHDF2 target mRNAs were identified with transcriptomic and proteomic analysis.**

1075 **(A, B)** Gene Ontology (GO) analysis of YTHDF2 target transcripts identified by anti-YTHDF2 RNA

1076 immunoprecipitation (RIP) in the retina followed by RNA sequencing (RIP-seq). Neural terms were

1077 picked out in Cellular Component **(A)** and Biological Process **(B)**.

1078 (C) GO analysis of proteins which are upregulated after YTHDF2 KD by MS.

1079 (D) Verification of m<sup>6</sup>A modification of YTHDF2 target mRNAs by anti-m<sup>6</sup>A pulldown followed by RT-

1080 qPCR. ND, not detected. Data are mean ± SEM and are represented as dot plots (*n* = 3 replicates):

1081 \*\**p* = 0.0016 for *Kalrn7*; \*\*\*\**p* = 1.40E-08 for *Kalrn9*; \*\*\*\**p* = 1.46E-06 for *Kalrn12*; \*\*\*\**p* = 5.46E-06

1082 for *Strn*; \*\*\*\**p* = 4.90E-06 for *Ubr4*; by unpaired Student's *t* test.

1083

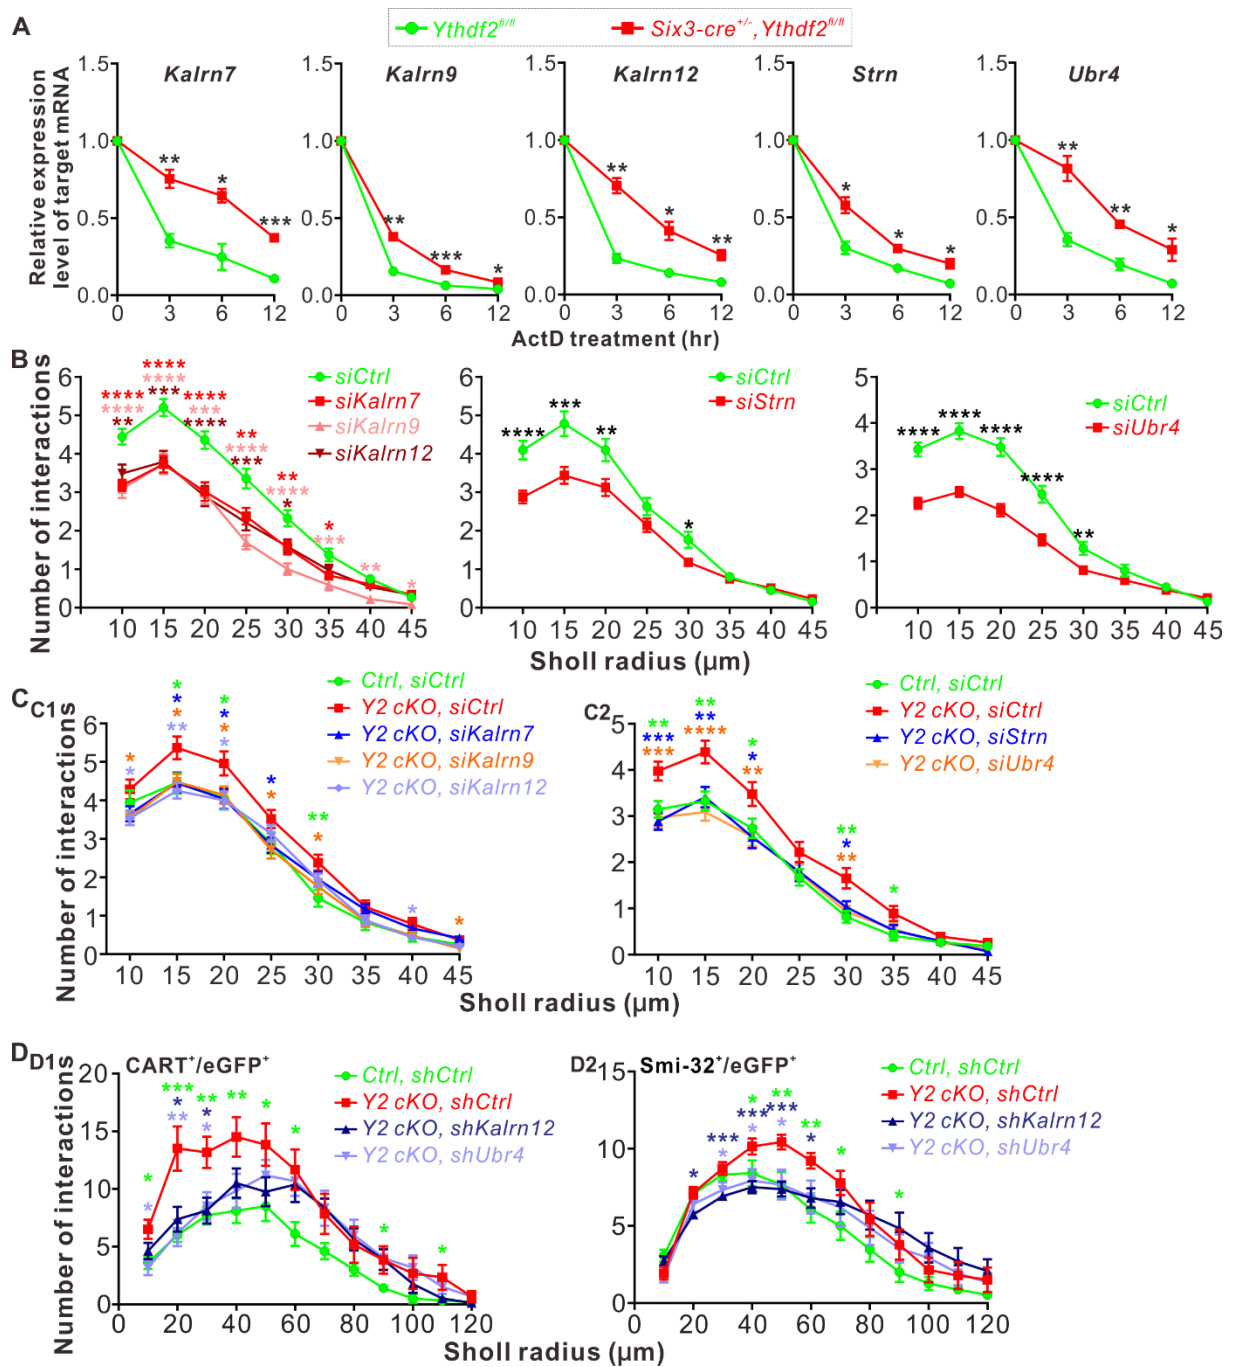

1084

1085 **Figure 7. YTHDF2 target mRNAs mediate YTHDF2-controlled RGC dendrite branching.**

1086 (A) YTHDF2 target mRNAs showing increased stability in the *Ythdf2* cKO retina. RGCs dissected from  
1087 E14.5 *Ythdf2* cKO and control embryos were cultured, treated with actinomycin D (ActD) and  
1088 collected at different timepoints. Data are mean  $\pm$  SEM ( $n = 3$  replicates). For *Kalrn7*,  $**p = 0.0057$  (3  
1089 hr),  $*p = 0.014$  (6 hr),  $***p = 0.00039$  (12 hr); for *Kalrn9*,  $**p = 0.0036$  (3 hr),  $***p = 0.00090$  (6 hr),  $*p$   
1090  $= 0.032$  (12 hr); for *Kalrn12*,  $***p = 0.0012$  (3 hr),  $*p = 0.010$  (6 hr),  $**p = 0.0069$  (12 hr); for *Strn*,  $*p =$   
1091  $0.014$  (3 hr),  $*p = 0.012$  (6 hr),  $*p = 0.016$  (12 hr); for *Ubr4*,  $**p = 0.0077$  (3 hr),  $**p = 0.0059$  (6 hr),  $*p$   
1092  $= 0.041$  (12 hr); all by unpaired Student's *t* test.

1093 (B) KD of the target mRNAs causing decreased dendrite branching of cultured RGCs prepared from  
1094 wild type (WT) E14.5 retina by Sholl analysis. Brn3a and MAP2 IF were used to mark RGCs and  
1095 visualize dendrites. Data are mean  $\pm$  SEM. For *Kalrn7* ( $n = 59$  for *siCtrl*,  $n = 56$  for *siKalrn7*),  $***p =$   
1096  $2.33E-06$  (10  $\mu$ m),  $***p = 5.85E-06$  (15  $\mu$ m),  $***p = 8.67E-05$  (20  $\mu$ m),  $**p = 0.0045$  (25  $\mu$ m),  $**p =$   
1097  $0.0058$  (30  $\mu$ m),  $*p = 0.010$  (35  $\mu$ m); for *Kalrn9* ( $n = 59$  for *siCtrl*,  $n = 46$  for *siKalrn9*),  $***p = 3.69E-$   
1098  $05$  (10  $\mu$ m),  $***p = 5.53E-05$  (15  $\mu$ m),  $***p = 0.00020$  (20  $\mu$ m),  $***p = 3.09E-06$  (25  $\mu$ m),  $***p =$   
1099  $4.63E-06$  (30  $\mu$ m),  $***p = 0.00059$  (35  $\mu$ m),  $**p = 0.0010$  (40  $\mu$ m),  $*p = 0.042$  (45  $\mu$ m); for *Kalrn12* ( $n$   
1100  $= 59$  for *siCtrl*,  $n = 39$  for *siKalrn12*),  $**p = 0.0031$  (10  $\mu$ m),  $***p = 0.00017$  (15  $\mu$ m),  $***p = 6.56E-05$   
1101 (20  $\mu$ m),  $**p = 0.0017$  (25  $\mu$ m),  $*p = 0.017$  (30  $\mu$ m); for *Strn* ( $n = 51$  for *siCtrl*,  $n = 57$  for *siStrn*),  $***p =$   
1102  $4.19E-05$  (10  $\mu$ m),  $***p = 0.00067$  (15  $\mu$ m),  $**p = 0.0079$  (20  $\mu$ m),  $*p = 0.015$  (30  $\mu$ m); for *Ubr4* ( $n =$   
1103  $81$  for *siCtrl*,  $n = 81$  for *siUbr4*),  $***p = 1.26E-08$  (10  $\mu$ m),  $***p = 7.61E-10$  (15  $\mu$ m),  $***p = 2.35E-$   
1104  $08$  (20  $\mu$ m),  $***p = 1.39E-05$  (25  $\mu$ m),  $**p = 0.0061$  (30  $\mu$ m); all by unpaired Student's *t* test.

1105 (C) Increased dendrite branching of cultured RGCs prepared from E14.5 *Ythdf2* cKO retina was  
1106 rescued by KD of target mRNAs using siRNAs. Data are mean  $\pm$  SEM. *Ctrl*, *Ythdf2<sup>fl/fl</sup>*; *Y2 cKO*, *Six3-cre<sup>+/-</sup>*  
1107 *, Ythdf2<sup>fl/fl</sup>*. In **C1**, “*Ctrl*, *siCtrl*” ( $n = 35$  neurons) vs “*Y2 cKO*, *siCtrl*” ( $n = 52$  neurons),  $*p = 0.038$  (15  $\mu$ m),  
1108  $*p = 0.045$  (20  $\mu$ m),  $**p = 0.0036$  (30  $\mu$ m); “*Y2 cKO*, *siKalrn7*” ( $n = 55$  neurons) vs “*Y2 cKO*, *siCtrl*”,  $*p$   
1109  $= 0.020$  (15  $\mu$ m),  $*p = 0.025$  (20  $\mu$ m),  $*p = 0.031$  (25  $\mu$ m); “*Y2 cKO*, *siKalrn9*” ( $n = 66$  neurons) vs “*Y2*  
1110 *cKO*, *siCtrl*”,  $*p = 0.020$  (10  $\mu$ m),  $*p = 0.013$  (15  $\mu$ m),  $*p = 0.031$  (20  $\mu$ m),  $*p = 0.017$  (25  $\mu$ m),  $*p =$   
1111  $0.031$  (30  $\mu$ m),  $*p = 0.031$  (45  $\mu$ m); “*Y2 cKO*, *siKalrn12*” ( $n = 80$  neurons) vs “*Y2 cKO*, *siCtrl*”,  $*p =$

1112 0.015 (10  $\mu\text{m}$ ),  $**p = 0.0018$  (15  $\mu\text{m}$ ),  $*p = 0.015$  (20  $\mu\text{m}$ ),  $*p = 0.027$  (40  $\mu\text{m}$ ). In **C2**, “*Ctrl*, *siCtrl*” ( $n =$   
1113 50 neurons) vs “*Y2 cKO*, *siCtrl*” ( $n = 47$  neurons),  $**p = 0.0031$  (10  $\mu\text{m}$ ),  $**p = 0.0013$  (15  $\mu\text{m}$ ),  $*p =$   
1114 0.029 (20  $\mu\text{m}$ ),  $**p = 0.0015$  (30  $\mu\text{m}$ ),  $*p = 0.014$  (35  $\mu\text{m}$ ); “*Y2 cKO*, *siStrn*” ( $n = 45$  neurons) vs “*Y2*  
1115 *cKO*, *siCtrl*”,  $***p = 0.00016$  (10  $\mu\text{m}$ ),  $**p = 0.0043$  (15  $\mu\text{m}$ ),  $*p = 0.010$  (20  $\mu\text{m}$ ),  $*p = 0.018$  (30  $\mu\text{m}$ );  
1116 “*Y2 cKO*, *siUbr4*” ( $n = 57$  neurons) vs “*Y2 cKO*, *siCtrl*”,  $***p = 0.00084$  (10  $\mu\text{m}$ ),  $****p = 4.89\text{E-}05$  (15  
1117  $\mu\text{m}$ ),  $**p = 0.0058$  (20  $\mu\text{m}$ ),  $**p = 0.0045$  (30  $\mu\text{m}$ ). All by unpaired Student’s *t* test.

1118 **(D)** Increased dendrite branching of RGC subtypes in *Ythdf2* cKO retina was rescued by KD of target  
1119 mRNAs through intravitreal injection of AAV siRNAs in vivo. Data are mean  $\pm$  SEM. *Ctrl*, *Ythdf2<sup>fl/fl</sup>*; *Y2*  
1120 *cKO*, *Six3-cre<sup>+/-</sup>*; *Ythdf2<sup>fl/fl</sup>*. In **D1** (CART<sup>+</sup>/eGFP<sup>+</sup> ooDSGCs), “*Ctrl*, *shCtrl*” ( $n = 10$  neurons) vs “*Y2 cKO*,  
1121 *shCtrl*” ( $n = 6$  neurons),  $*p = 0.010$  (10  $\mu\text{m}$ ),  $***p = 0.00049$  (20  $\mu\text{m}$ ),  $**p = 0.0021$  (30  $\mu\text{m}$ ),  $**p =$   
1122 0.0047 (40  $\mu\text{m}$ ),  $*p = 0.028$  (50  $\mu\text{m}$ ),  $*p = 0.011$  (60  $\mu\text{m}$ ),  $*p = 0.030$  (90  $\mu\text{m}$ ),  $*p = 0.042$  (110  $\mu\text{m}$ );  
1123 “*Y2 cKO*, *shKalrn12*” ( $n = 8$  neurons) vs “*Y2 cKO*, *shCtrl*”,  $*p = 0.012$  (20  $\mu\text{m}$ ),  $*p = 0.014$  (30  $\mu\text{m}$ ); “*Y2*  
1124 *cKO*, *shUbr4*” ( $n = 6$  neurons) vs “*Y2 cKO*, *shCtrl*”,  $*p = 0.011$  (10  $\mu\text{m}$ ),  $**p = 0.0084$  (20  $\mu\text{m}$ ),  $*p =$   
1125 0.029 (30  $\mu\text{m}$ ). In **D2** (SMI-32<sup>+</sup>  $\alpha$ RGCs), “*Ctrl*, *shCtrl*” ( $n = 14$  neurons) vs “*Y2 cKO*, *shCtrl*” ( $n = 14$   
1126 neurons),  $*p = 0.032$  (40  $\mu\text{m}$ ),  $**p = 0.0019$  (50  $\mu\text{m}$ ),  $**p = 0.0014$  (60  $\mu\text{m}$ ),  $*p = 0.015$  (70  $\mu\text{m}$ ),  $*p =$   
1127 0.044 (90  $\mu\text{m}$ ); “*Y2 cKO*, *shKalrn12*” ( $n = 26$  neurons) vs “*Y2 cKO*, *shCtrl*”,  $**p = 0.0023$  (20  $\mu\text{m}$ ),  $***p$   
1128  $= 0.00076$  (30  $\mu\text{m}$ ),  $***p = 0.00030$  (40  $\mu\text{m}$ ),  $***p = 0.00020$  (50  $\mu\text{m}$ ),  $*p = 0.015$  (60  $\mu\text{m}$ ); “*Y2 cKO*,  
1129 *shUbr4*” ( $n = 15$  neurons) vs “*Y2 cKO*, *shCtrl*”,  $*p = 0.042$  (30  $\mu\text{m}$ ),  $*p = 0.024$  (40  $\mu\text{m}$ ),  $*p = 0.018$  (50  
1130  $\mu\text{m}$ ). All by unpaired Student’s *t* test.

1131

1132



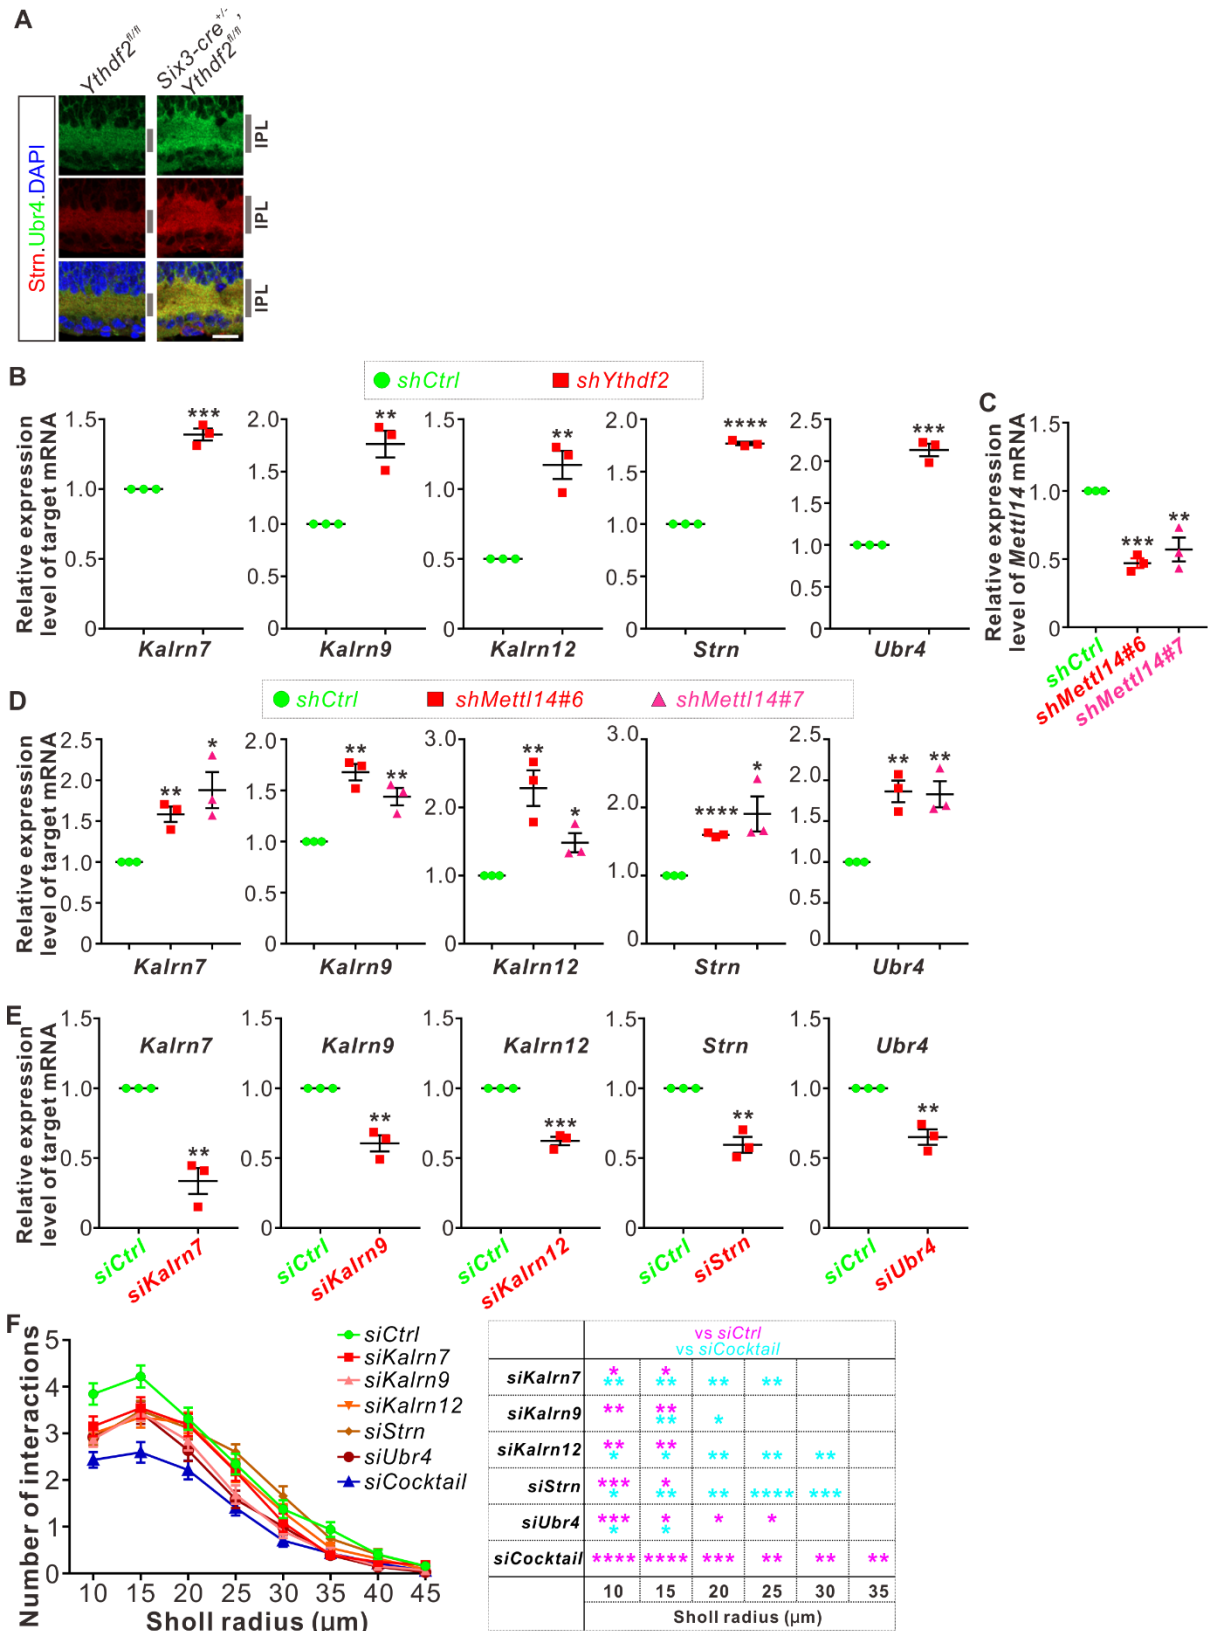

1133

1134

**Figure 7—figure supplement 1. YTHDF2 target mRNAs were characterized and validated.**

1135 (A) Upregulation of target mRNAs-encoding proteins *Strn* and *Ubr4* in *Ythdf2* cKO retina in vivo.  
1136 Enrichment and higher levels of these proteins were detected in the IPL of P6 *Ythdf2* cKO retina  
1137 compared with control by IF. Scale bar: 20  $\mu$ m.

1138 (B) Upregulation of target mRNA levels after YTHDF2 KD. RT-qPCR confirmed upregulation of the  
1139 candidate target mRNAs after KD of YTHDF2 in cultured RGCs using *shYthdf2*. Data are mean  $\pm$  SEM  
1140 and are represented as dot plots ( $n = 3$  replicates): \*\*\* $p = 0.00084$  for *Kalrn7*; \*\* $p = 0.0039$  for  
1141 *Kalrn9*; \*\* $p = 0.0026$  for *Kalrn12*; \*\*\*\* $p = 1.11E-06$  for *Strn*; \*\*\* $p = 0.00011$  for *Ubr4*; by unpaired  
1142 Student's *t* test.

1143 (C) Confirmation of METTL14 KD in cultured RGCs using *shMettl14* by RT-qPCR. Data are mean  $\pm$  SEM  
1144 and are represented as dot plots ( $n = 3$  replicates): \*\*\* $p = 0.00012$  (*shMettl14#6* vs *shCtrl*); \*\* $p =$   
1145  $0.0079$  (*shMettl14#7* vs *shCtrl*); by unpaired Student's *t* test.

1146 (D) Upregulation of target mRNA levels after METTL14 KD. RT-qPCR confirmed upregulation of the  
1147 candidate target mRNAs after KD of METTL14 in cultured RGCs using *shMettl14*. Data are mean  $\pm$   
1148 SEM and are represented as dot plots ( $n = 3$  replicates): for *Kalrn7*, \*\* $p = 0.0034$  (*shMettl14#6* vs  
1149 *shCtrl*), \* $p = 0.016$  (*shMettl14#7* vs *shCtrl*); for *Kalrn9*, \*\* $p = 0.0010$  (*shMettl14#6* vs *shCtrl*), \*\* $p =$   
1150  $0.0067$  (*shMettl14#7* vs *shCtrl*); for *Kalrn12*, \*\* $p = 0.0079$  (*shMettl14#6* vs *shCtrl*), \* $p = 0.026$   
1151 (*shMettl14#7* vs *shCtrl*); for *Strn*, \*\*\*\* $p = 5.45E-06$  (*shMettl14#6* vs *shCtrl*), \* $p = 0.025$  (*shMettl14#7*  
1152 vs *shCtrl*); for *Ubr4*, \*\* $p = 0.0029$  (*shMettl14#6* vs *shCtrl*), \*\* $p = 0.0066$  (*shMettl14#7* vs *shCtrl*); by  
1153 unpaired Student's *t* test.

1154 (E) Confirmation of KD by siRNAs against target mRNAs. Data are mean  $\pm$  SEM and are represented as  
1155 dot plots ( $n = 3$  replicates): \*\* $p = 0.0020$  for *Kalrn7*; \*\* $p = 0.0025$  for *Kalrn9*; \*\*\* $p = 0.00020$  for  
1156 *Kalrn12*; \*\* $p = 0.0021$  for *Strn*; \*\* $p = 0.0033$  for *Ubr4*; by unpaired Student's *t* test.

1157 (F) KD of target mRNAs all together using a siRNA cocktail causing further decrease of dendrite  
1158 branching of cultured RGCs compared with single siRNA against each target mRNA. Data are mean  $\pm$   
1159 SEM:  $n = 32$  RGCs for *siCtrl*,  $n = 33$  RGCs for *siKalrn7*,  $n = 32$  RGCs for *siKalrn9*,  $n = 35$  RGCs for  
1160 *siKalrn12*,  $n = 35$  RGCs for *siStrn*,  $n = 36$  RGCs for *siUbr4*,  $n = 36$  RGCs for *siCocktail*. *siKalrn7* vs *siCtrl*:

1161 \* $p$  = 0.031 (10  $\mu$ m), \* $p$  = 0.046 (15  $\mu$ m); *siKalrn9* vs *siCtrl*: \*\* $p$  = 0.0011 (10  $\mu$ m), \*\* $p$  = 0.0090 (15  
1162  $\mu$ m); *siKalrn12* vs *siCtrl*: \*\* $p$  = 0.0061 (10  $\mu$ m), \*\* $p$  = 0.0086 (15  $\mu$ m); *siStrn* vs *siCtrl*: \*\*\* $p$  = 0.00056  
1163 (10  $\mu$ m), \* $p$  = 0.025 (15  $\mu$ m); *siUbr4* vs *siCtrl*: \*\* $p$  = 0.0018 (10  $\mu$ m), \* $p$  = 0.026 (15  $\mu$ m), \* $p$  = 0.048  
1164 (20  $\mu$ m), \* $p$  = 0.011 (25  $\mu$ m); *siCocktail* vs *siCtrl*: \*\*\*\* $p$  = 3.44E-06 (10  $\mu$ m), \*\*\*\* $p$  = 4.07E-06 (15  $\mu$ m),  
1165 \*\*\* $p$  = 0.00077 (20  $\mu$ m), \*\* $p$  = 0.0010 (25  $\mu$ m), \*\* $p$  = 0.0049 (30  $\mu$ m), \*\* $p$  = 0.0094 (35  $\mu$ m). *siKalrn7*  
1166 vs *siCocktail*: \*\* $p$  = 0.0092 (10  $\mu$ m), \*\* $p$  = 0.0040 (15  $\mu$ m), \*\* $p$  = 0.0028 (20  $\mu$ m), \*\* $p$  = 0.0034 (25  
1167  $\mu$ m); *siKalrn9* vs *siCocktail*: \*\* $p$  = 0.0042 (15  $\mu$ m), \* $p$  = 0.034 (20  $\mu$ m); *siKalrn12* vs *siCocktail*: \* $p$  =  
1168 0.029 (10  $\mu$ m), \* $p$  = 0.019 (15  $\mu$ m), \*\* $p$  = 0.0014 (20  $\mu$ m), \*\* $p$  = 0.0091 (25  $\mu$ m), \*\* $p$  = 0.0063 (30  
1169  $\mu$ m); *siStrn* vs *siCocktail*: \* $p$  = 0.043 (10  $\mu$ m), \*\* $p$  = 0.0051 (15  $\mu$ m), \*\* $p$  = 0.0045 (20  $\mu$ m), \*\*\*\* $p$  =  
1170 3.79E-06 (25  $\mu$ m), \*\*\* $p$  = 0.00022 (30  $\mu$ m); *siUbr4* vs *siCocktail*: \* $p$  = 0.049 (10  $\mu$ m), \* $p$  = 0.011 (15  
1171  $\mu$ m). All by unpaired Student's  $t$  test.  
1172

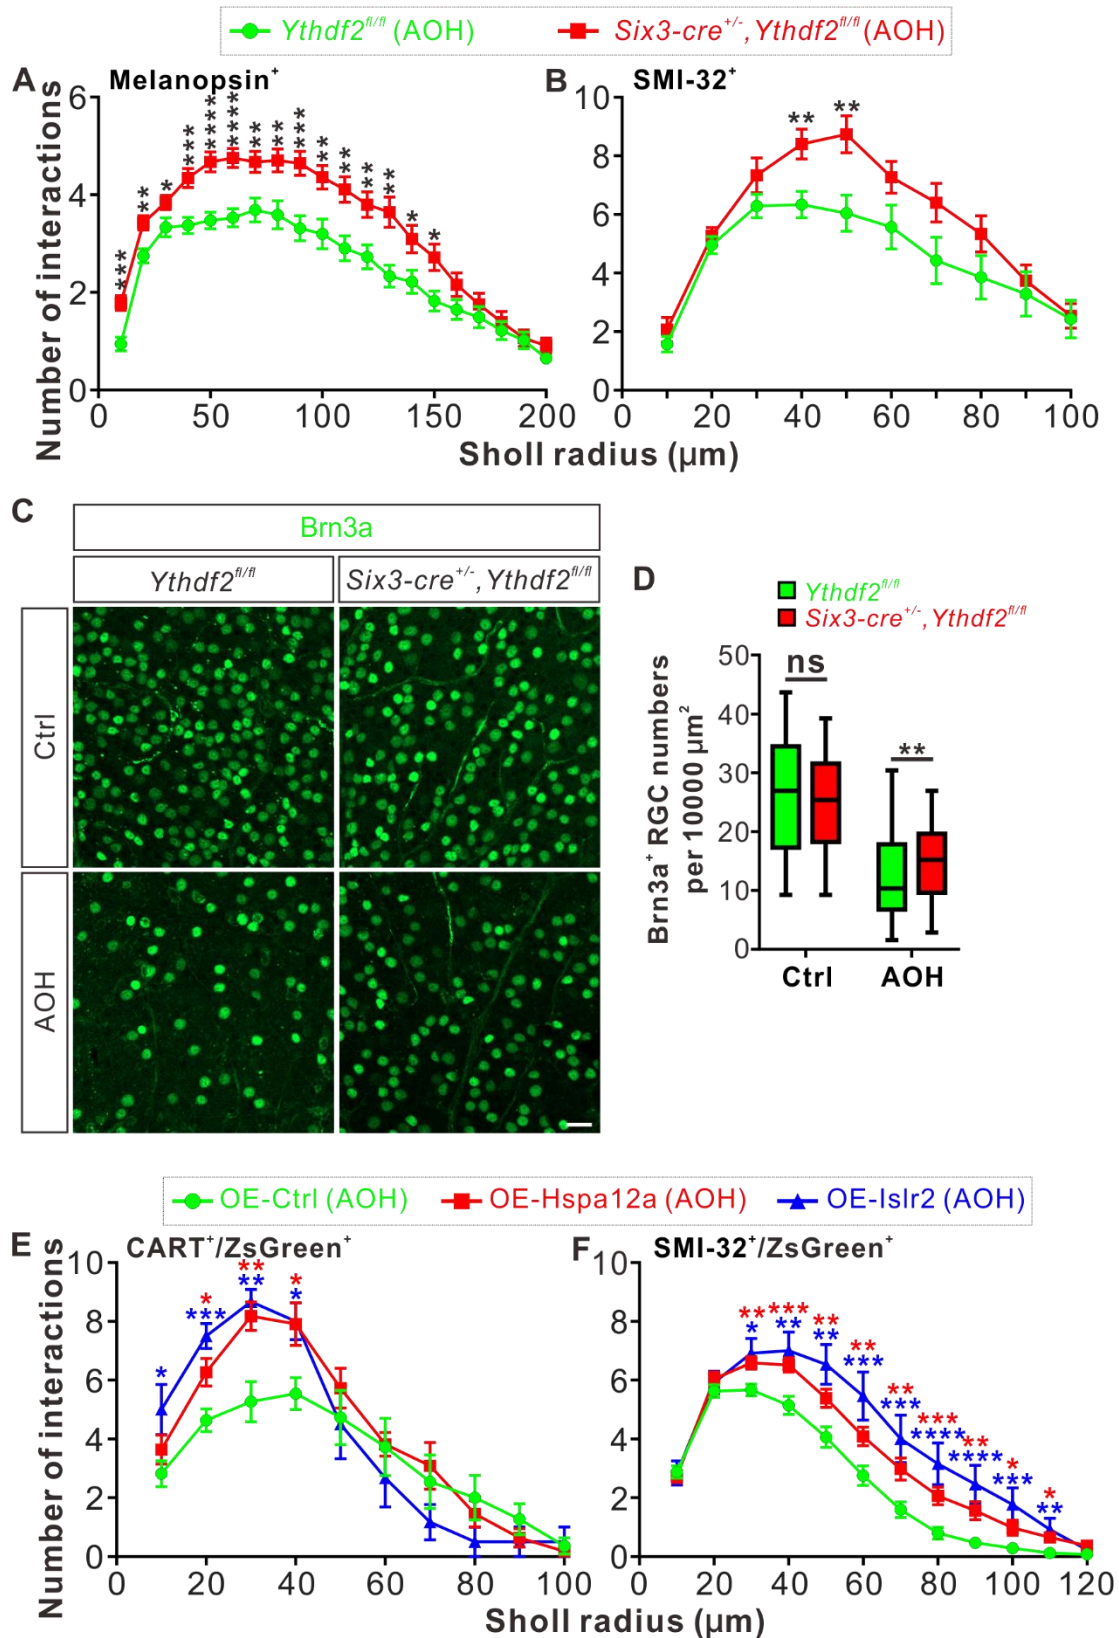

1173

1174 **Figure 8. *Ythdf2* cKO retina is more resistant to acute ocular hypertension (AOH).**

1175 (A, B) Better maintenance of RGC dendrite arborization in *Ythdf2* cKO retina after AOH operation.

1176 AOH was performed using adult mice, and retinas were collected after AOH for wholemount

1177 immunostaining of melanopsin and SMI-32 to visualize the dendrite arbors of corresponding RGC  
1178 subtype, respectively. Dendrite traces were drawn as previously shown and quantification of  
1179 dendrite branching was done using Sholl analysis. Data are mean  $\pm$  SEM. Numbers of interactions are  
1180 significantly greater in *Six3-cre<sup>+/+</sup>, Ythdf2<sup>fl/fl</sup>* retina than *Ythdf2<sup>fl/fl</sup>* control retina in both RGC subtypes  
1181 after AOH: for melanopsin<sup>+</sup> ipRGCs in **A**, *Ythdf2<sup>fl/fl</sup>/AOH* ( $n = 51$  RGCs) vs cKO/AOH ( $n = 64$  RGCs), \*\*\* $p$   
1182 = 0.00015 (10  $\mu$ m), \*\* $p$  = 0.0017 (20  $\mu$ m), \* $p$  = 0.034 (30  $\mu$ m), \*\*\* $p$  = 0.00035 (40  $\mu$ m), \*\*\*\* $p$  =  
1183 3.02E-05 (50  $\mu$ m), \*\*\*\* $p$  = 2.63E-05 (60  $\mu$ m), \*\* $p$  = 0.0029 (70  $\mu$ m), \*\* $p$  = 0.0028 (80  $\mu$ m), \*\*\* $p$  =  
1184 0.00035 (90  $\mu$ m), \*\* $p$  = 0.0032 (100  $\mu$ m), \*\* $p$  = 0.0014 (110  $\mu$ m), \*\* $p$  = 0.0043 (120  $\mu$ m), \*\* $p$  =  
1185 0.0014 (130  $\mu$ m), \* $p$  = 0.023 (140  $\mu$ m), \* $p$  = 0.013 (150  $\mu$ m); for SMI-32<sup>+</sup>  $\alpha$ RGCs in **B**, *Ythdf2<sup>fl/fl</sup>/AOH*  
1186 ( $n = 21$  neurons) vs cKO/AOH ( $n = 15$  neurons), \*\* $p$  = 0.0052 (40  $\mu$ m), \*\* $p$  = 0.0057 (50  $\mu$ m); all by  
1187 unpaired Student's  $t$  test.

1188 **(C, D)** *Ythdf2* cKO retina showing less severe RGC loss after AOH. AOH was performed using adult  
1189 mice and retinas were collected after AOH for wholemount immunostaining using a Brn3a antibody  
1190 **(C)**. Numbers of Brn3a<sup>+</sup> RGCs per 10000  $\mu$ m<sup>2</sup> of retina were quantified for different genotypes and  
1191 conditions (confocal fields for analysis:  $n = 117$  for *Ythdf2<sup>fl/fl</sup>/Ctrl*;  $n = 98$  for *Ythdf2<sup>fl/fl</sup>/AOH*;  $n = 110$   
1192 for cKO/Ctrl;  $n = 104$  for cKO/AOH). Data are represented as box and whisker plots **(D)**: ns, not  
1193 significant ( $p = 0.16$ ; *Ythdf2<sup>fl/fl</sup>/Ctrl* vs cKO/Ctrl); \*\* $p$  = 0.0077 (*Ythdf2<sup>fl/fl</sup>/AOH* vs cKO/AOH); by  
1194 unpaired Student's  $t$  test. Scale bar: 25  $\mu$ m.

1195 **(E, F)** Overexpression (OE) of YTHDF2 targets *Hspa12a* and *Islr2* protecting retina from RGC dendrite  
1196 degeneration. Wild type (WT) mice were intravitreally injected with AAV overexpressing *Hspa12a* or  
1197 *Islr2* and then operated with AOH. Wholemount immunostaining of CART/ZsGreen and SMI-  
1198 32/ZsGreen was carried out to visualize the dendrite arbors of corresponding RGC subtype,  
1199 respectively. Dendrite traces were drawn as previously shown and quantification of dendrite  
1200 branching was done using Sholl analysis. Data are mean  $\pm$  SEM. Numbers of interactions are  
1201 significantly greater in retina with OE of *Hspa12a* or *Islr2* than control retina in both RGC subtypes  
1202 after AOH. For CART<sup>+</sup> ooDSGCs in **E**: OE-Ctrl/AOH ( $n = 11$  RGCs) vs OE-Hspa12a/AOH ( $n = 11$  RGCs), \* $p$

1203 = 0.014 (20  $\mu$ m), \*\* $p$  = 0.0025 (30  $\mu$ m), \* $p$  = 0.018 (40  $\mu$ m); OE-Ctrl/AOH vs OE-Isir2/AOH ( $n$  = 6  
1204 RGCs), \* $p$  = 0.024 (10  $\mu$ m), \*\*\* $p$  = 0.00031 (20  $\mu$ m), \*\* $p$  = 0.0038 (30  $\mu$ m), \* $p$  = 0.013 (40  $\mu$ m). For  
1205 SMI-32<sup>+</sup>  $\alpha$ RGCs in F: OE-Ctrl/AOH ( $n$  = 49 neurons) vs OE-Hspa12a/AOH ( $n$  = 46 neurons), \*\* $p$  =  
1206 0.0023 (30  $\mu$ m), \*\*\* $p$  = 0.00080 (40  $\mu$ m), \*\* $p$  = 0.0059 (50  $\mu$ m), \*\* $p$  = 0.0051 (60  $\mu$ m), \*\* $p$  = 0.0036  
1207 (70  $\mu$ m), \*\*\* $p$  = 0.00070 (80  $\mu$ m), \*\* $p$  = 0.0015 (90  $\mu$ m), \* $p$  = 0.016 (100  $\mu$ m), \* $p$  = 0.011 (110  $\mu$ m);  
1208 OE-Ctrl/AOH vs OE-Isir2/AOH ( $n$  = 13 RGCs), \* $p$  = 0.010 (30  $\mu$ m), \*\* $p$  = 0.0093 (40  $\mu$ m), \*\* $p$  = 0.0019  
1209 (50  $\mu$ m), \*\*\* $p$  = 0.00085 (60  $\mu$ m), \*\*\* $p$  = 0.00067 (70  $\mu$ m), \*\*\*\* $p$  = 4.25E-05 (80  $\mu$ m), \*\*\*\* $p$  = 2.54E-  
1210 05 (90  $\mu$ m), \*\*\* $p$  = 0.00020 (100  $\mu$ m), \*\* $p$  = 0.0016 (110  $\mu$ m). All by unpaired Student's  $t$  test.  
1211

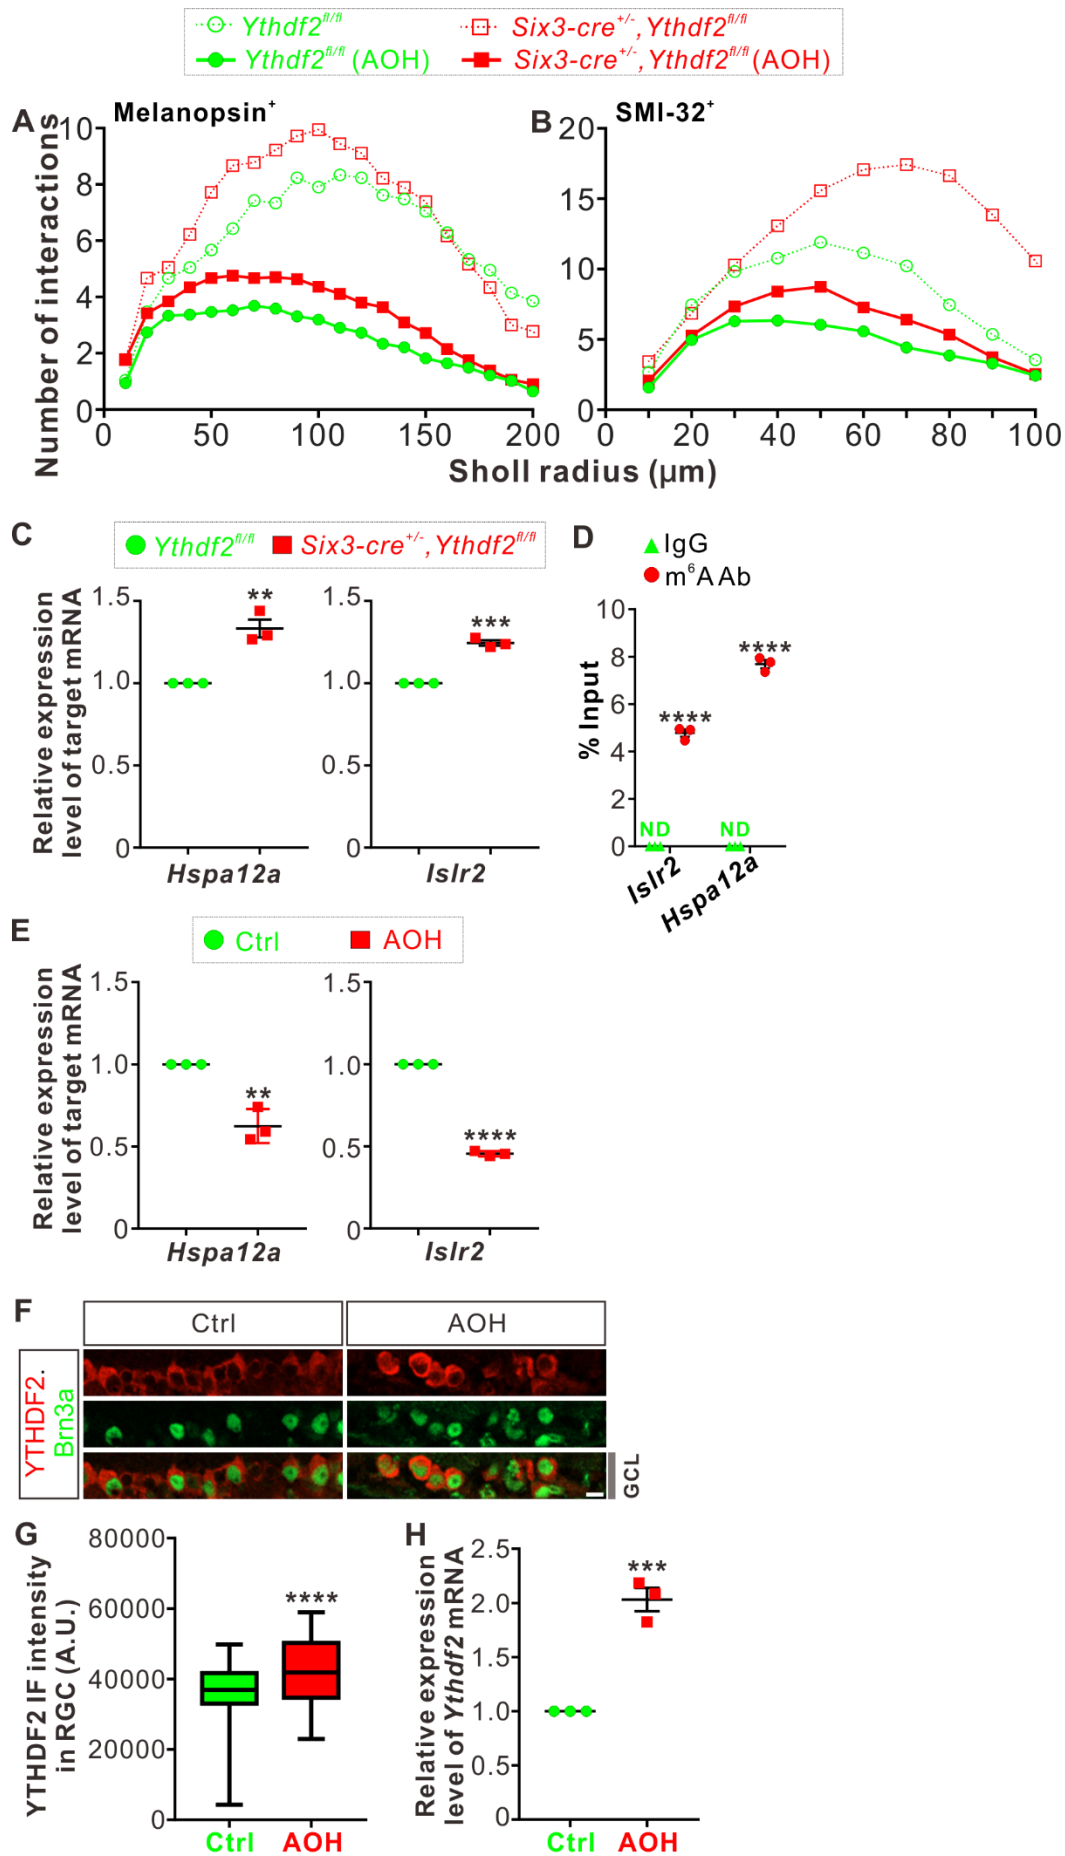

1213 **Figure 8—figure supplement 1. *Hspa12a* and *Islr2* are two target mRNAs of YTHDF2 in adult retina.**

1214 **(A, B)** The curves from *Figure 3D,F* and *Figure 8A,B* were plotted together for easy comparison. The  
1215 error bars and the asterisks were removed from these graphs for easy reading and these information  
1216 can still be seen in *Figure 3D,F* and *Figure 8A,B*.

1217 **(C)** Upregulation of YTHDF2 target mRNA *Hspa12a* and *Islr2* in adult *Ythdf2* cKO retina compared with  
1218 control by RT-qPCR. Data are mean  $\pm$  SEM and are represented as dot plots ( $n = 3$  replicates):  $**p =$   
1219  $0.0035$  for *Hspa12a*;  $***p = 0.00012$  for *Islr2*; by unpaired Student's *t* test.

1220 **(D)** Verification of m<sup>6</sup>A modification of *Hspa12a* and *Islr2* mRNAs by anti-m<sup>6</sup>A pulldown followed by  
1221 RT-qPCR. ND, not detected. Data are mean  $\pm$  SEM and are represented as dot plots ( $n = 3$  replicates):  
1222  $****p = 7.07E-06$  for *Islr2*;  $****p = 1.55E-06$  for *Hspa12a*; by unpaired Student's *t* test.

1223 **(E)** Downregulation of *Hspa12a* and *Islr2* mRNA levels in retina 3 days after AOH. Data are mean  $\pm$   
1224 SEM and are represented as dot plots ( $n = 3$  replicates):  $**p = 0.0032$  for *Hspa12a*;  $****p = 5.41E-07$   
1225 for *Islr2*; by unpaired Student's *t* test.

1226 **(F, G)** Cross-sections of retina showing increased YTHDF2 expression in Brn3a<sup>+</sup> RGCs by IF. AOH was  
1227 performed using P60 mice, and retinas were collected 1 day after AOH for analysis. Quantification  
1228 data of YTHDF2 IF were represented as box and whisker plots **(G)**:  $****p = 1.13E-06$  ( $n = 110$  RGCs for  
1229 each condition); by unpaired Student's *t* test. Scale bar: 10  $\mu$ m.

1230 **(H)** Upregulation of *Ythdf2* mRNA level after AOH. Data are mean  $\pm$  SEM and are represented as dot  
1231 plots ( $n = 3$  replicates):  $***p = 0.00066$ ; by unpaired Student's *t* test.

1232

1233

1234 **Supplementary file 1. List of YTHDF2 target mRNAs by anti YTHDF2 RIP-seq.**

1235

1236 **Supplementary file 2. Proteome of YTHDF2 knockdown vs control.**

1237

1238 **Supplementary file 3. Overlapping mRNA of Y2-RIP vs Y2-KD-MS.**



1239

1240 **Figure 1-source data 1. Source data for Figure 1B.**

1241 (A) WB of anti YTHDF2 after KD of YTHDF2.

1242 (B) WB of anti  $\beta$ -actin after KD of YTHDF2.

1243

1244 **Figure 1-source data 2. Source data for Figure 1B.**

1245 Original file of the full raw unedited blot of anti YTHDF2 after KD of YTHDF2.

1246

1247 **Figure 1-source data 3. Source data for Figure 1B.**

1248 Original file of the full raw unedited blot of anti  $\beta$ -actin after KD of YTHDF2.

1249

1250 **Figure 1-figure supplement 1-source data 1. Source data for Figure 1-figure supplement 1E,F.**

1251 (A) WB of anti YTHDF1 after KD of YTHDF1.

1252 (B) WB of anti  $\beta$ -actin after KD of YTHDF1.

1253 (C) WB of anti YTHDF3 after KD of YTHDF3.

1254 (D) WB of anti  $\beta$ -actin after KD of YTHDF3.

1255

1256 **Figure 1-figure supplement 1-source data 2. Source data for Figure 1-figure supplement 1E.**

1257 Original file of the full raw unedited blot of anti YTHDF1 after KD of YTHDF1.

1258

1259 **Figure 1-figure supplement 1-source data 3. Source data for Figure 1-figure supplement 1E.**

1260 Original file of the full raw unedited blot of anti  $\beta$ -actin after KD of YTHDF1.

1261

1262 **Figure 1-figure supplement 1-source data 4. Source data for Figure 1-figure supplement 1F.**

1263 Original file of the full raw unedited blot of anti YTHDF3 after KD of YTHDF3.

1264

1265 **Figure 1-figure supplement 1-source data 5. Source data for Figure 1-figure supplement 1F.**

1266 Original file of the full raw unedited blot of anti  $\beta$ -actin after KD of YTHDF3.

1267

1268
